# Supplementary material for: Cycloaddition of tertiary aziridines and carbon dioxide using a recyclable organocatalyst, 1,3-di-tert-butylimidazolium-2-carboxylate: straightforward access to 3-substituted 2-oxazolidones
Source: Royal Society of Chemistry journal article supplement (doi:10.1039/c2gc36414j), 2012-10-25
Supplement: c2gc36414j.pdf [file c2gc36414j.pdf]

## **ELECTRONIC SUPPLEMENTARY INFORMATION**

### **Cycloaddition of Tertiary Aziridines and Carbon Dioxide Using a Recyclable Organocatalyst, 1,3-Di-*tert*-butylimidazolium-2-carboxylate: A Straightforward Access to 3-Substituted 2-Oxazolidones**

Atsushi Ueno, Yoshihito Kayaki and Takao Ikariya

Department of Applied Chemistry, Graduate School of Science and Engineering, Tokyo  
Institute of Technology, O-okayama 2-12-1-E4-1, Meguro-ku, Tokyo 152-8552, Japan

#### **CONTENTS**

|                                                  |    |
|--------------------------------------------------|----|
| <b>General information</b>                       | S2 |
| <b>Synthesis of Aziridines (2d–2e and 2g–2o)</b> | S3 |
| <b>References</b>                                | S7 |
| <b>NMR Spectra of Substrates and Products.</b>   | S8 |

**General information.** Solvents were purchased from Kanto Chemical Co., Inc. or Nacalai Tesque, Inc. Et<sub>2</sub>O was dried by refluxing over sodium benzophenone ketyl and distilled under argon. 1-(2-Hydroxyethyl)ethyleneimine (**2c**) was purchased from Tokyo Kasei Co. Ltd., and used after purification by distillation under argon. Other reagents were used as delivered. Aziridine substrates of **2a**, **2b** and **2f** were prepared by the literature methods.<sup>1</sup>

### Synthesis of Aziridines (**2d–2e** and **2g–2o**).

To an Et<sub>2</sub>O solution (40.0 mL) of 1-(2-Hydroxyethyl)ethyleneimine (1.50 g, 17.2 mmol) was added NaH (1.2 g, 30 mmol) under argon atmosphere at 0 °C. The mixture was stirred for 10 minutes, and appropriate organic bromides (17.2 mmol) dissolved in Et<sub>2</sub>O (10 mL) was added dropwisely at room temperature over a period of 5 minutes. After stirring for 18 h, H<sub>2</sub>O (5.0 mL) was added to the solution. The ethereal solution was washed with brine (50 mL) and dried with Na<sub>2</sub>SO<sub>4</sub>. The filtrate was concentrated *in vacuo* to give the crude products. The desired aziridines were isolated after purification by column chromatography using alumina and distillation.

### *N*-[2-Benzyloxy]ethyl]aziridine (**2d**).

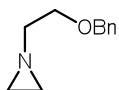

The title compound was prepared from benzyl bromide by the procedure described above: yield: 75%; colorless liquid. <sup>1</sup>H NMR (399.8 MHz, CDCl<sub>3</sub>) δ 1.17 (m, 2H), 1.75 (m, 2H), 2.44 (t, 2H, <sup>3</sup>J<sub>HH</sub> = 5.8 Hz; NCH<sub>2</sub>CH<sub>2</sub>O), 3.65 (t, 2H, <sup>3</sup>J<sub>HH</sub> = 5.8 Hz; NCH<sub>2</sub>CH<sub>2</sub>O), 4.57 (s, 2H; CH<sub>2</sub>C<sub>6</sub>H<sub>5</sub>), 7.26-7.37 (m, 4H; CH<sub>2</sub>C<sub>6</sub>H<sub>5</sub>); <sup>13</sup>C{<sup>1</sup>H} NMR

(100.5 MHz,  $\text{CDCl}_3$ )  $\delta$  27.1, 61.1, 69.8, 73.2, 127.4, 127.5, 128.3, 138.4; HRMS (ESI) calcd for  $\text{C}_{11}\text{H}_{16}\text{NO}$  178.1226 ( $\text{M} + \text{H}^+$ ), found 178.1224.

**1-[2-(Allyloxy)ethyl]aziridine (2e).**

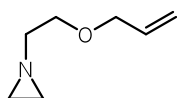

The title compound was prepared from allyl bromide by the procedure described above: yield: 56%; colorless liquid.  $^1\text{H}$  NMR (399.8 MHz,  $\text{CDCl}_3$ )  $\delta$  1.15 (m, 2H), 1.73 (m, 2H), 2.40 (t, 2H,  $^3J_{\text{HH}} = 5.8$  Hz;  $\text{NCH}_2\text{CH}_2\text{OCH}_2$ ), 3.59 (t, 2H,  $^3J_{\text{HH}} = 5.6$  Hz;  $\text{NCH}_2\text{CH}_2\text{OCH}_2$ ), 4.01 (m, 2H;  $\text{CH}_2\text{CH}=\text{CH}_2$ ), 5.16 (ddt, 1H,  $^2J_{\text{HH}} = 10.4$  Hz,  $^3J_{\text{HH}} = 1.8$  Hz,  $^4J_{\text{HH}} = 1.2$  Hz;  $\text{CH}_2\text{CH}=\text{CH}_2$ ), 5.30 (ddt, 1H,  $^2J_{\text{HH}} = 17.2$  Hz,  $^3J_{\text{HH}} = 1.8$  Hz,  $^4J_{\text{HH}} = 1.8$  Hz;  $\text{CH}_2\text{CH}=\text{CH}_2$ ), 5.87-5.97 (m, 1H;  $\text{CH}_2\text{CH}=\text{CH}_2$ );  $^{13}\text{C}\{^1\text{H}\}$  NMR (100.5 MHz,  $\text{CDCl}_3$ )  $\delta$  61.1, 69.7, 72.1, 116.7, 134.8; HRMS (ESI) calcd for  $\text{C}_7\text{H}_{14}\text{NO}$  128.1070 ( $\text{M} + \text{H}^+$ ), found 128.1073.

**1-[2-(Benzoyloxy)ethyl]aziridine (2g).**

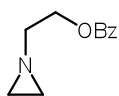

The title compound was prepared from benzoyl bromide by the procedure described above: yield: 55%; colorless liquid.  $^1\text{H}$  NMR (399.8 MHz,  $\text{CDCl}_3$ )  $\delta$  1.22 (m, 2H), 1.81 (m, 2H), 2.33 (t, 2H,  $^3J_{\text{HH}} = 5.5$  Hz;  $\text{NCH}_2\text{CH}_2\text{O}$ ), 4.49 (t, 2H,  $^3J_{\text{HH}} = 5.5$  Hz;  $\text{NCH}_2\text{CH}_2\text{O}$ ), 7.41-8.07 (m, 5H;  $\text{COC}_6\text{H}_5$ );  $^{13}\text{C}\{^1\text{H}\}$  NMR (100.5 MHz,  $\text{CDCl}_3$ )  $\delta$  27.2, 59.8, 128.3, 129.6, 130.1, 132.9, 166.5. Anal. Calcd. for  $\text{C}_{11}\text{H}_{13}\text{NO}_2$ : C, 69.09; H, 6.85; N, 7.32. Found: C, 69.47; H, 6.74; N, 7.02.

**1-[2-(3-Fluorophenyl)methoxy]ethyl]aziridine (2h).**

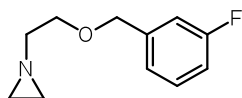

The title compound was prepared from 3-fluorobenzyl bromide by the procedure described above: yield: 72%; colorless liquid.  $^1\text{H}$  NMR (399.8 MHz,  $\text{CDCl}_3$ )  $\delta$  1.17 (m, 2H), 1.76 (m, 2H), 2.44 (t, 2H,  $^3J_{\text{HH}} = 5.5$  Hz;  $\text{NCH}_2\text{CH}_2\text{O}$ ), 3.65 (t, 2H,  $^3J_{\text{HH}} = 5.5$  Hz;  $\text{NCH}_2\text{CH}_2\text{O}$ ), 4.56 (s, 2H;  $\text{CH}_2\text{C}_6\text{H}_4\text{F}$ ), 7.07-7.31 (m, 4H;  $\text{CH}_2\text{C}_6\text{H}_4\text{F}$ );  $^{13}\text{C}\{^1\text{H}\}$  NMR (100.5 MHz,  $\text{CDCl}_3$ )  $\delta$  27.1, 61.0, 70.0, 72.4, 114.1(d), 114.3(d), 122.7, 129.7(d), 141.1, 162.7(d). Anal. Calcd. for  $\text{C}_{11}\text{H}_{14}\text{FNO}$ : C, 67.67; H, 7.23; N, 7.17. Found: C, 67.89; H, 6.95; N, 6.80.

**1-[2-(3-Chlorophenyl)methoxy]ethyl]aziridine (2i).**

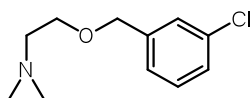

The title compound was prepared from 3-chlorobenzyl bromide by the procedure described above: yield: 62%; colorless liquid.  $^1\text{H}$  NMR (399.8 MHz,  $\text{CDCl}_3$ )  $\delta$  1.17 (m, 2H), 1.76 (m, 2H), 2.44 (t, 2H,  $^3J_{\text{HH}} = 5.5$  Hz;  $\text{NCH}_2\text{CH}_2\text{O}$ ), 3.64 (t, 2H,  $^3J_{\text{HH}} = 5.5$  Hz;  $\text{NCH}_2\text{CH}_2\text{O}$ ), 4.53 (s, 2H;  $\text{CH}_2\text{C}_6\text{H}_4\text{Cl}$ ), 7.20-7.36 (m, 4H;  $\text{CH}_2\text{C}_6\text{H}_4\text{Cl}$ );  $^{13}\text{C}\{^1\text{H}\}$  NMR (100.5 MHz,  $\text{CDCl}_3$ )  $\delta$  27.1, 61.0, 70.0, 72.3, 125.4, 127.4, 127.5, 129.5, 134.2, 140.5. Anal. Calcd. for  $\text{C}_{11}\text{H}_{14}\text{ClNO}$ : C, 62.42; H, 6.67; N, 6.62. Found: C, 62.53; H, 6.59; N, 6.23.

**1-[2-(3-Bromophenyl)methoxy]ethyl]aziridine (2j).**

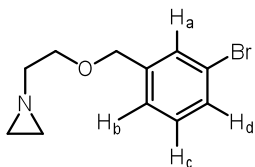

The title compound was prepared from 3-bromobenzyl bromide by the procedure described above: yield: 52%; colorless liquid. <sup>1</sup>H NMR (399.8 MHz, CDCl<sub>3</sub>) δ 1.17 (m, 2H), 1.76 (m, 2H), 2.44 (t, 2H, <sup>3</sup>J<sub>HH</sub> = 5.5 Hz; NCH<sub>2</sub>CH<sub>2</sub>O), 3.64 (t, 2H, <sup>3</sup>J<sub>HH</sub> = 5.5 Hz; NCH<sub>2</sub>CH<sub>2</sub>O), 4.53 (s, 2H; CH<sub>2</sub>C<sub>6</sub>H<sub>4</sub>Br), 7.20 (m, 1H; aromatic), 7.26 (d, 1H, <sup>3</sup>J<sub>HH</sub> = 6.4 Hz; aromatic), 7.41 (d, 1H, <sup>3</sup>J<sub>HH</sub> = 1.2 Hz; aromatic), 7.52 (s, 1H; aromatic); <sup>13</sup>C{<sup>1</sup>H} NMR (100.5 MHz, CDCl<sub>3</sub>) δ 27.1, 61.0, 70.0, 72.3, 122.4, 125.9, 129.8, 130.4, 130.5, 140.8; HRMS (ESI) calcd for C<sub>11</sub>H<sub>14</sub>BrNONa 278.0157 (M + Na<sup>+</sup>), found 278.0163.

**1-[2-(3-Iodophenyl)methoxy]ethyl]aziridine (2k).**

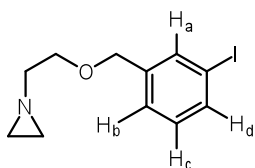

The title compound was prepared from 3-iodobenzyl bromide, but was decomposed at around 200 °C. The product was purified only with column chromatography: yield: 70%; colorless liquid. <sup>1</sup>H NMR (399.8 MHz, CDCl<sub>3</sub>) δ 1.17 (m, 2H), 1.76 (m, 2H), 2.43 (t, 2H, <sup>3</sup>J<sub>HH</sub> = 5.5 Hz; NCH<sub>2</sub>CH<sub>2</sub>O), 3.63 (t, 2H, <sup>3</sup>J<sub>HH</sub> = 5.5 Hz; NCH<sub>2</sub>CH<sub>2</sub>O), 4.50 (s, 2H; CH<sub>2</sub>C<sub>6</sub>H<sub>4</sub>I), 7.07 (dd, 1H; aromatic), 7.29 (d, 1H, <sup>3</sup>J<sub>HH</sub> = 6.4 Hz; aromatic), 7.60 (d, 1H, <sup>3</sup>J<sub>HH</sub> = 8.0 Hz; aromatic), 7.71 (s, 1H; aromatic); <sup>13</sup>C{<sup>1</sup>H} NMR (100.5 MHz, CDCl<sub>3</sub>) δ 27.1, 61.0, 70.0, 72.3, 122.4, 125.9, 129.8, 130.4, 130.5, 140.8. Anal. Calcd. for C<sub>11</sub>H<sub>14</sub>INO: C, 43.48; H, 4.66; N, 4.62. Found: C, 43.55; H, 4.64; N, 4.48..

### 1-[2-(3-Nitrophenyl)methoxy]ethyl]aziridine (2l).

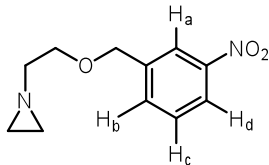

The title compound was prepared from 3-nitrobenzyl bromide by the procedure described above: yield: 40%; orange liquid. <sup>1</sup>H NMR (399.8 MHz, CDCl<sub>3</sub>) δ 1.19 (m, 2H), 1.78 (m, 2H), 2.47 (t, 2H, <sup>3</sup>J<sub>HH</sub> = 5.5 Hz; NCH<sub>2</sub>CH<sub>2</sub>O), 3.69 (t, 2H, <sup>3</sup>J<sub>HH</sub> = 5.5 Hz; NCH<sub>2</sub>CH<sub>2</sub>O), 4.66 (s, 2H; CH<sub>2</sub>C<sub>6</sub>H<sub>4</sub>NO<sub>2</sub>), 7.50 (m, 1H; aromatic), 7.68 (d, 1H, <sup>3</sup>J<sub>HH</sub> = 7.6 Hz; aromatic), 8.13 (d, 1H, <sup>3</sup>J<sub>HH</sub> = 8.2 Hz; aromatic), 8.23 (s, 1H; aromatic); <sup>13</sup>C{<sup>1</sup>H} NMR (100.5 MHz, CDCl<sub>3</sub>) δ 27.2, 61.0, 70.5, 71.8, 122.0, 122.4, 129.2, 133.1, 140.7, 148.1. Anal. Calcd. for C<sub>11</sub>H<sub>14</sub>N<sub>2</sub>O<sub>3</sub>: C, 59.45; H, 6.35; N, 12.60. Found: C, 59.70; H, 6.13; N, 12.26.

### 1-[2-(3-Methoxyphenyl)methoxy]ethyl]aziridine (2m).

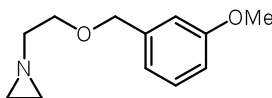

The title compound was prepared from 3-methoxybenzyl bromide by the procedure described above: yield: 60%; colorless liquid. <sup>1</sup>H NMR (399.8 MHz, CDCl<sub>3</sub>) δ 1.17 (m, 2H), 1.75 (m, 2H), 2.43 (t, 2H, <sup>3</sup>J<sub>HH</sub> = 5.5 Hz; NCH<sub>2</sub>CH<sub>2</sub>O), 3.64 (t, 2H, <sup>3</sup>J<sub>HH</sub> = 5.5 Hz; NCH<sub>2</sub>CH<sub>2</sub>O), 3.80 (s, 2H; OCH<sub>3</sub>), 4.54 (s, 2H; CH<sub>2</sub>C<sub>6</sub>H<sub>4</sub>NO<sub>2</sub>), 6.80-6.83 (m, 1H), 6.91-6.93 (m, 2H), 7.24 (m, 1H); <sup>13</sup>C{<sup>1</sup>H} NMR (100.5 MHz, CDCl<sub>3</sub>) δ 55.1, 61.1, 69.8, 73.0, 112.8, 113.1, 119.7, 129.3, 140.0, 159.6; HRMS (ESI) calcd for C<sub>12</sub>H<sub>18</sub>NO 208.1332 (M + H<sup>+</sup>), found 208.1337.

**1-[2-(3,4-Methylenedioxyphenylmethoxy)ethyl]aziridine (2n).**

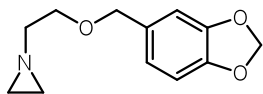

The title compound was prepared from 3,4-methylenedioxybenzyl bromide by the procedure described above: yield: 50%; colorless liquid.  $^1\text{H}$  NMR (399.8 MHz,  $\text{CDCl}_3$ )  $\delta$  1.16 (m, 2H), 1.75 (m, 2H), 2.41 (t, 2H,  $^3J_{\text{HH}} = 5.5$  Hz;  $\text{NCH}_2\text{CH}_2\text{O}$ ), 3.61 (t, 2H,  $^3J_{\text{HH}} = 5.5$  Hz;  $\text{NCH}_2\text{CH}_2\text{O}$ ), 3.39 (s, 2H;  $\text{CH}_2\text{C}_5\text{H}_3\text{OCH}_2\text{O}$ ), 5.94 (s, 2H;  $\text{CH}_2\text{C}_5\text{H}_3\text{OCH}_2\text{O}$ ), 6.75-6.86 (m, 3H;  $\text{CH}_2\text{C}_5\text{H}_3\text{OCH}_2\text{O}$ );  $^{13}\text{C}\{^1\text{H}\}$  NMR (100.5 MHz,  $\text{CDCl}_3$ )  $\delta$  27.1, 61.1, 65.5, 73.0, 100.8, 107.9, 108.3, 121.1, 132.3, 146.9, 147.6; HRMS (ESI) calcd for  $\text{C}_{12}\text{H}_{16}\text{NO}_3$  222.1125 ( $\text{M} + \text{H}^+$ ), found 222.1125.

**1-[2-(Thiophen-2-ylmethoxy)ethyl]aziridine (2o).**

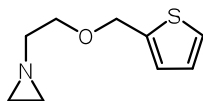

The title compound was prepared from 2-bromothiophene by the procedure described above: yield: 62%; pale yellow liquid.  $^1\text{H}$  NMR (399.8 MHz,  $\text{CDCl}_3$ )  $\delta$  1.16 (m, 2H), 1.74 (m, 2H), 2.42 (t, 2H,  $^3J_{\text{HH}} = 5.5$  Hz;  $\text{NCH}_2\text{CH}_2\text{O}$ ), 3.65 (t, 2H,  $^3J_{\text{HH}} = 5.5$  Hz;  $\text{NCH}_2\text{CH}_2\text{O}$ ), 4.72 (s, 2H;  $\text{CH}_2\text{C}_4\text{H}_3\text{S}$ ), 6.96-7.27 (m, 3H;  $\text{CH}_2\text{C}_4\text{H}_3\text{S}$ );  $^{13}\text{C}\{^1\text{H}\}$  NMR (100.5 MHz,  $\text{CDCl}_3$ )  $\delta$  27.1, 61.0, 67.7, 69.4, 125.6, 126.2, 126.5, 141.1. Anal. Calcd. for  $\text{C}_9\text{H}_{13}\text{NOS}$ : C, 58.98; H, 7.15; N, 7.64. Found: C, 58.67; H, 7.04; N, 7.39.

**References**

<sup>1</sup>(a) H. Wenker, *J. Am. Chem. Soc.*, 1935, **57**, 2328. (b) T. Munegumi, I. Azumaya, T. Kato, H. Masu and S. Saito, *Org. Lett.*, 2006, **27**, 379–382.

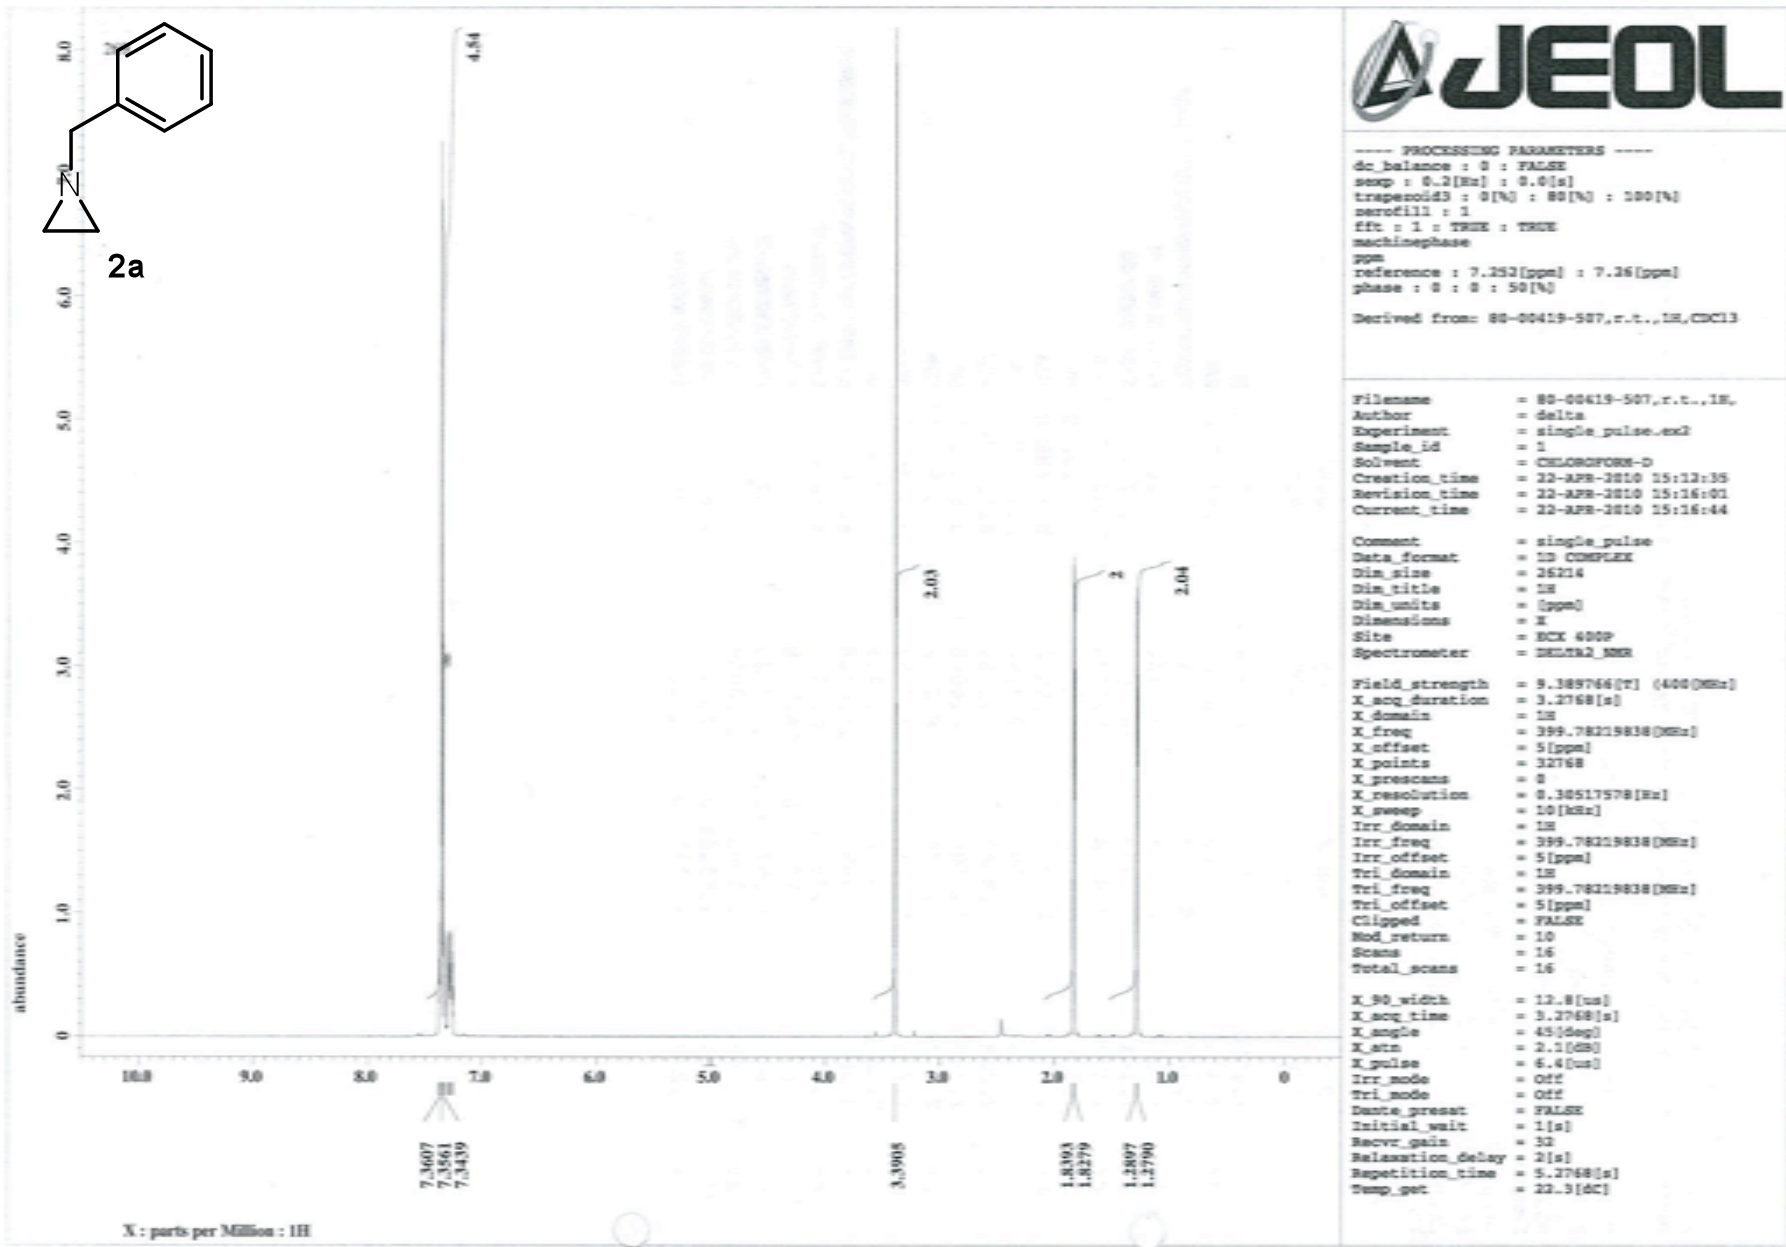



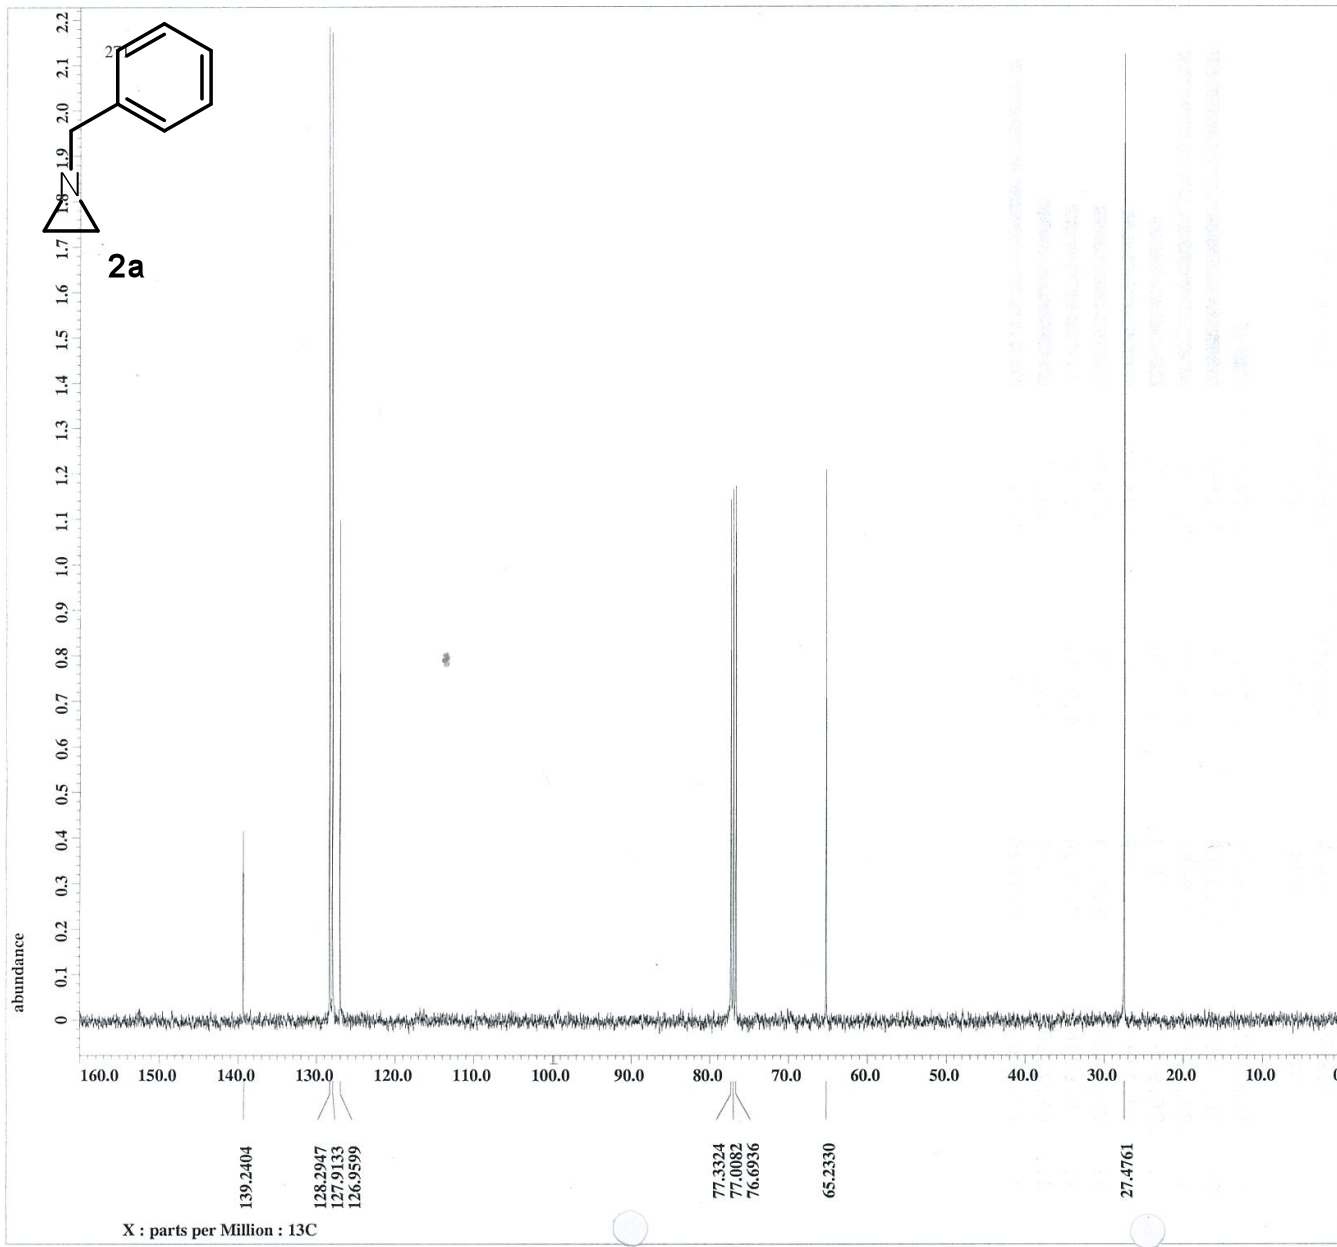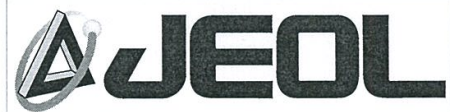

---- PROCESSING PARAMETERS ----  
 dc\_balance : 0 : FALSE  
 secp : 2.0[Hz] : 0.0[s]  
 trapezoid3 : 0[%] : 80[%] : 100[%]  
 zeroFill : 1  
 fft : 1 : TRUE : TRUE  
 machinephase  
 ppm  
 reference : 77.166[ppm] : 77[ppm]  
 Derived from: 80-00419-507,r.t.,13C,CDC1

Filename = 80-00419-507,r.t.,13C  
 Author = delta  
 Experiment = single\_pulse\_dec  
 Sample\_id = 1  
 Solvent = CHLOROFORM-D  
 Creation\_time = 22-APR-2010 15:21:33  
 Revision\_time = 22-APR-2010 15:22:36  
 Current\_time = 22-APR-2010 15:22:37

Comment = single pulse decouple  
 Data\_format = 1D COMPLEX  
 Dim\_size = 26214  
 Dim\_title = 13C  
 Dim\_units = [ppm]  
 Dimensions = X  
 Site = ECX 400P  
 Spectrometer = DELTA2\_NMR

Field\_strength = 9.389766[T] (400[MHz])  
 X\_acq\_duration = 1.04333312[s]  
 X\_domain = 13C  
 X\_freq = 100.52530333[MHz]  
 X\_offset = 100[ppm]  
 X\_points = 32768  
 X\_prescans = 2  
 X\_resolution = 0.95846665[Hz]  
 X\_sweep = 31.40703518[kHz]  
 Irr\_domain = 1H  
 Irr\_freq = 399.78219838[MHz]  
 Irr\_offset = 5[ppm]  
 Clipped = FALSE  
 Mod\_return = 1  
 Scans = 49  
 Total\_scans = 49

X\_90\_width = 9.5[us]  
 X\_acq\_time = 1.04333312[s]  
 X\_angle = 30[deg]  
 X\_atn = 5.2[db]  
 X\_pulse = 3.16666667[us]  
 Irr\_atn\_dec = 21.10216[db]  
 Irr\_atn\_noe = 21.10216[db]  
 Irr\_noise = WALTZ  
 Decoupling = TRUE  
 Initial\_wait = 1[s]  
 Noe = TRUE  
 Noe\_time = 3[s]  
 Recvr\_gain = 60  
 Relaxation\_delay = 3[s]  
 Repetition\_time = 4.04333312[s]  
 Temp\_get = 22.9[dc]

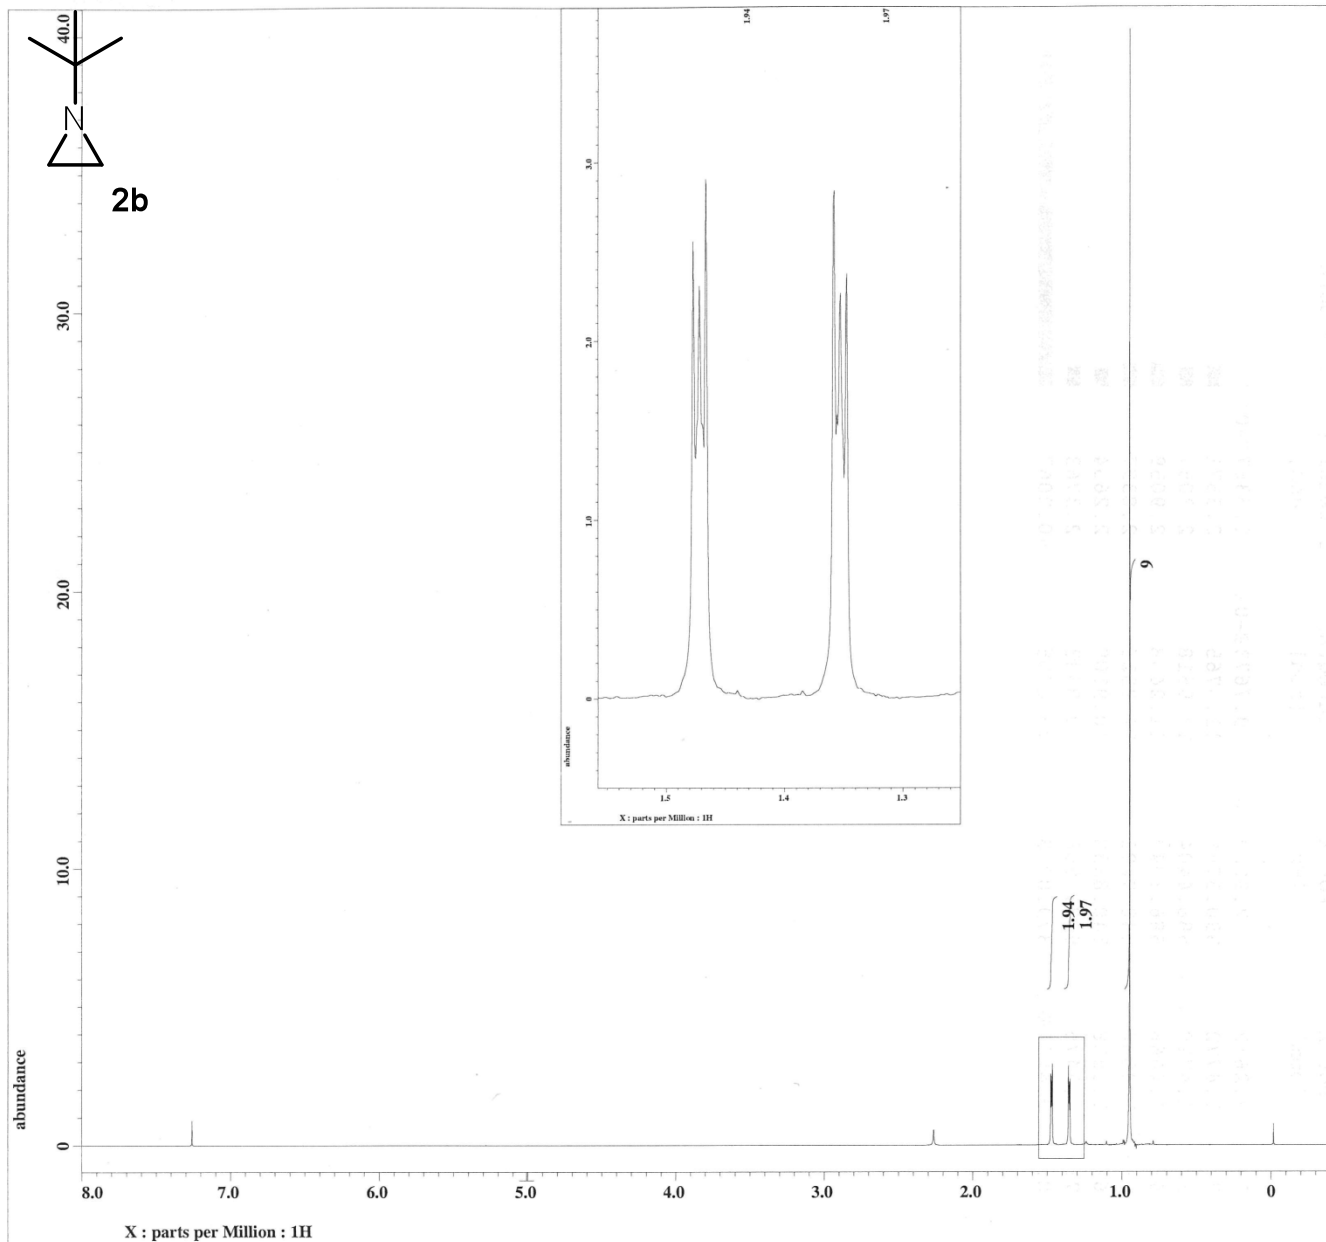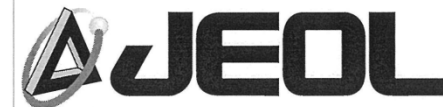

----- PROCESSING PARAMETERS -----  
dc\_balance : 0 : FALSE  
sexp : 0.2[Hz] : 0.0[s]  
trapezoid3 : 0[%] : 80[%] : 100[%]  
zerofill : 1  
fft : 1 : TRUE : TRUE  
machinephase  
ppm  
base\_correct : None : 0 : Smooth  
reference : 7.253[ppm] : 7.26[ppm]  
Derived from: 80-tBuaz-dist,rt,1H,CDCl3-

Filename = 80-tBuaz-dist,rt,1H,C  
Author = delta  
Experiment = single\_pulse.ex2  
Sample\_id = 1  
Solvent = CHLOROFORM-D  
Creation\_time = 15-JUN-2012 19:01:59  
Revision\_time = 15-JUN-2012 19:10:55  
Current\_time = 15-JUN-2012 19:11:44

Comment = single\_pulse  
Data\_format = 1D REAL  
Dim\_size = 26214  
Dim\_title = 1H  
Dim\_units = [ppm]  
Dimensions = X  
Site = ECX 400P  
Spectrometer = DELTA2\_NMR

Field\_strength = 9.389766[T] (400[MHz])  
X\_acq\_duration = 3.2768[s]  
X\_domain = 1H  
X\_freq = 399.78219838[MHz]  
X\_offset = 5[ppm]  
X\_points = 32768  
X\_prescans = 0  
X\_resolution = 0.30517578[Hz]  
X\_sweep = 10[kHz]  
Irr\_domain = 1H  
Irr\_freq = 399.78219838[MHz]  
Irr\_offset = 5[ppm]  
Tri\_domain = 1H  
Tri\_freq = 399.78219838[MHz]  
Tri\_offset = 5[ppm]  
Clipped = FALSE  
Mod\_return = 1  
Scans = 4  
Total\_scans = 4

X\_90\_width = 13.2[us]  
X\_acq\_time = 3.2768[s]  
X\_angle = 45[deg]  
X\_atn = 2.1[dB]  
X\_pulse = 6.6[us]  
Irr\_mode = Off  
Tri\_mode = Off  
Dante\_presat = FALSE  
Initial\_wait = 1[s]  
Recvr\_gain = 36  
Relaxation\_delay = 2[s]  
Repetition\_time = 5.2768[s]  
Temp\_get = 403.5[degC]

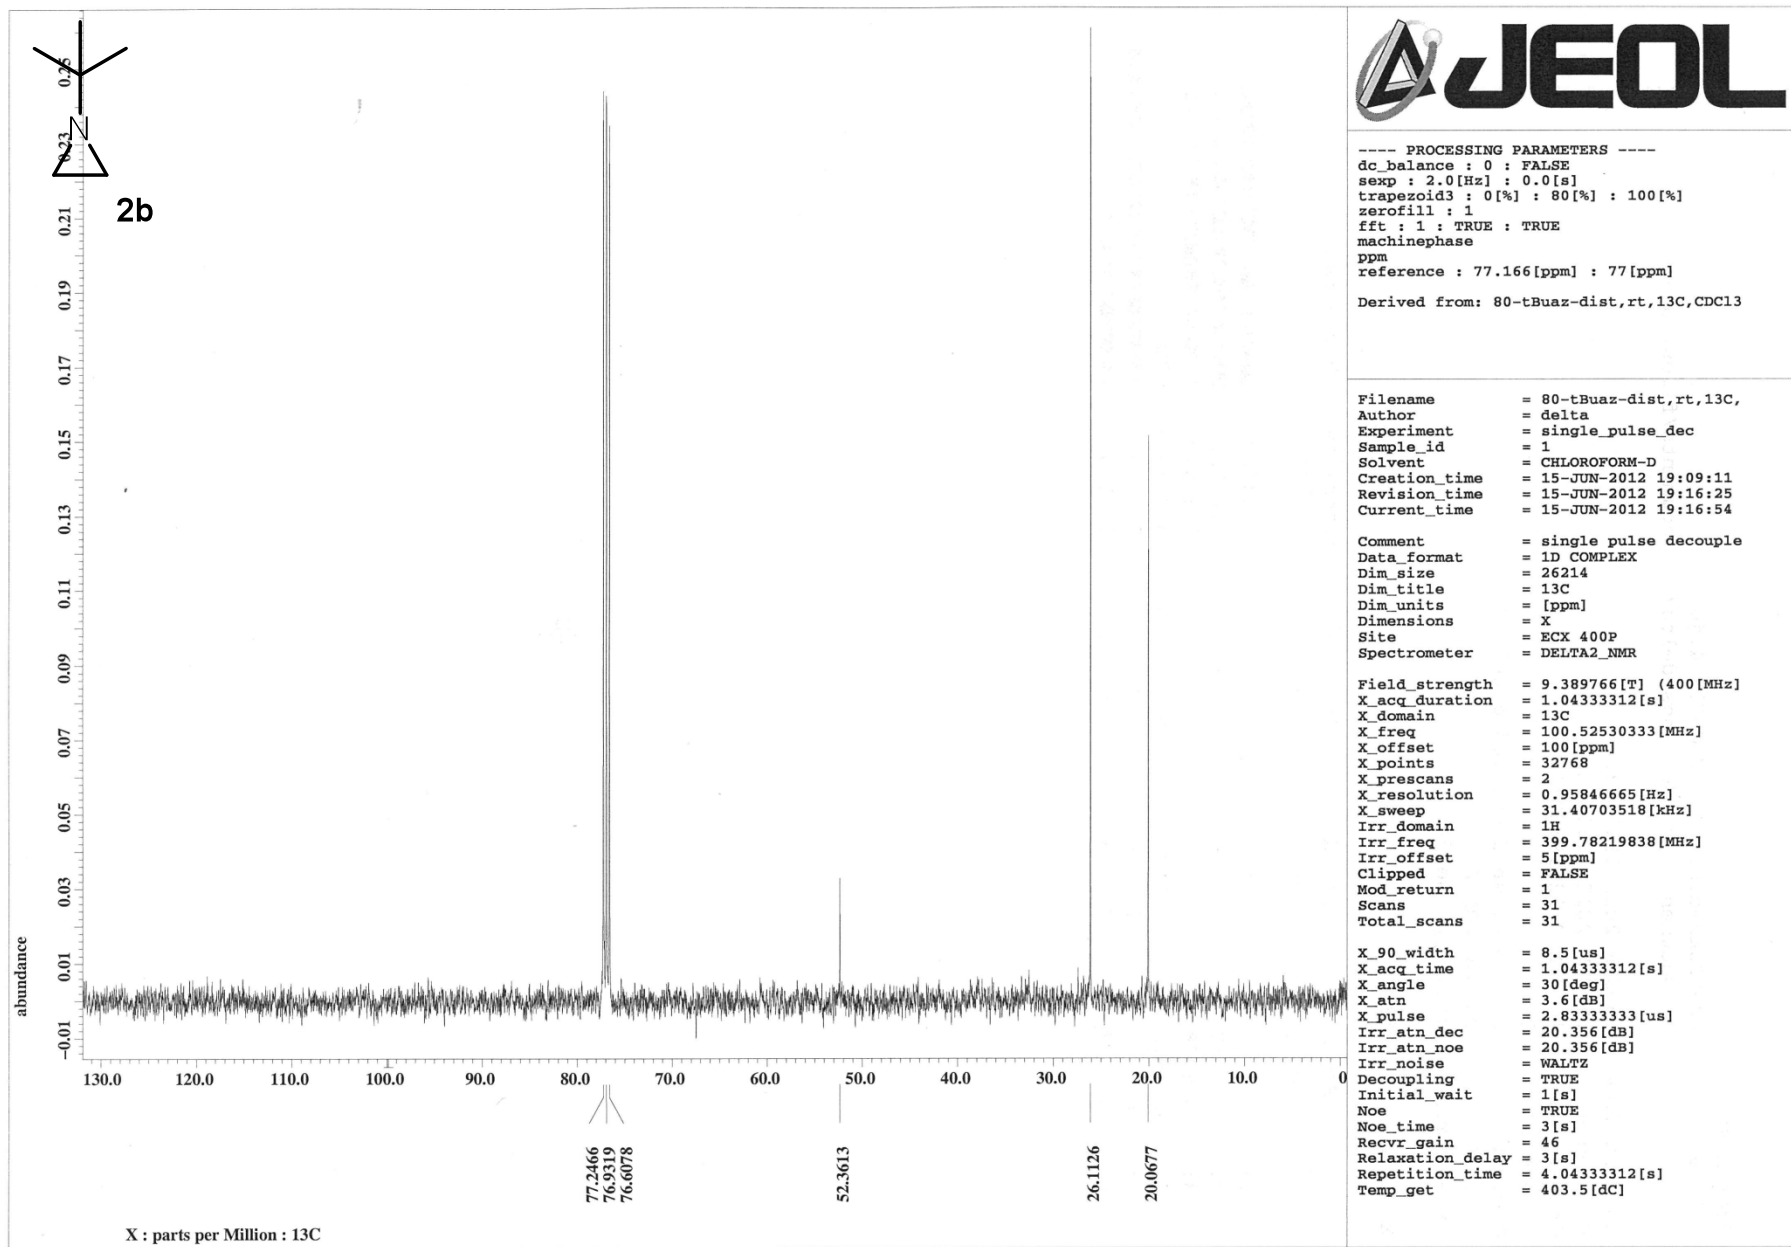

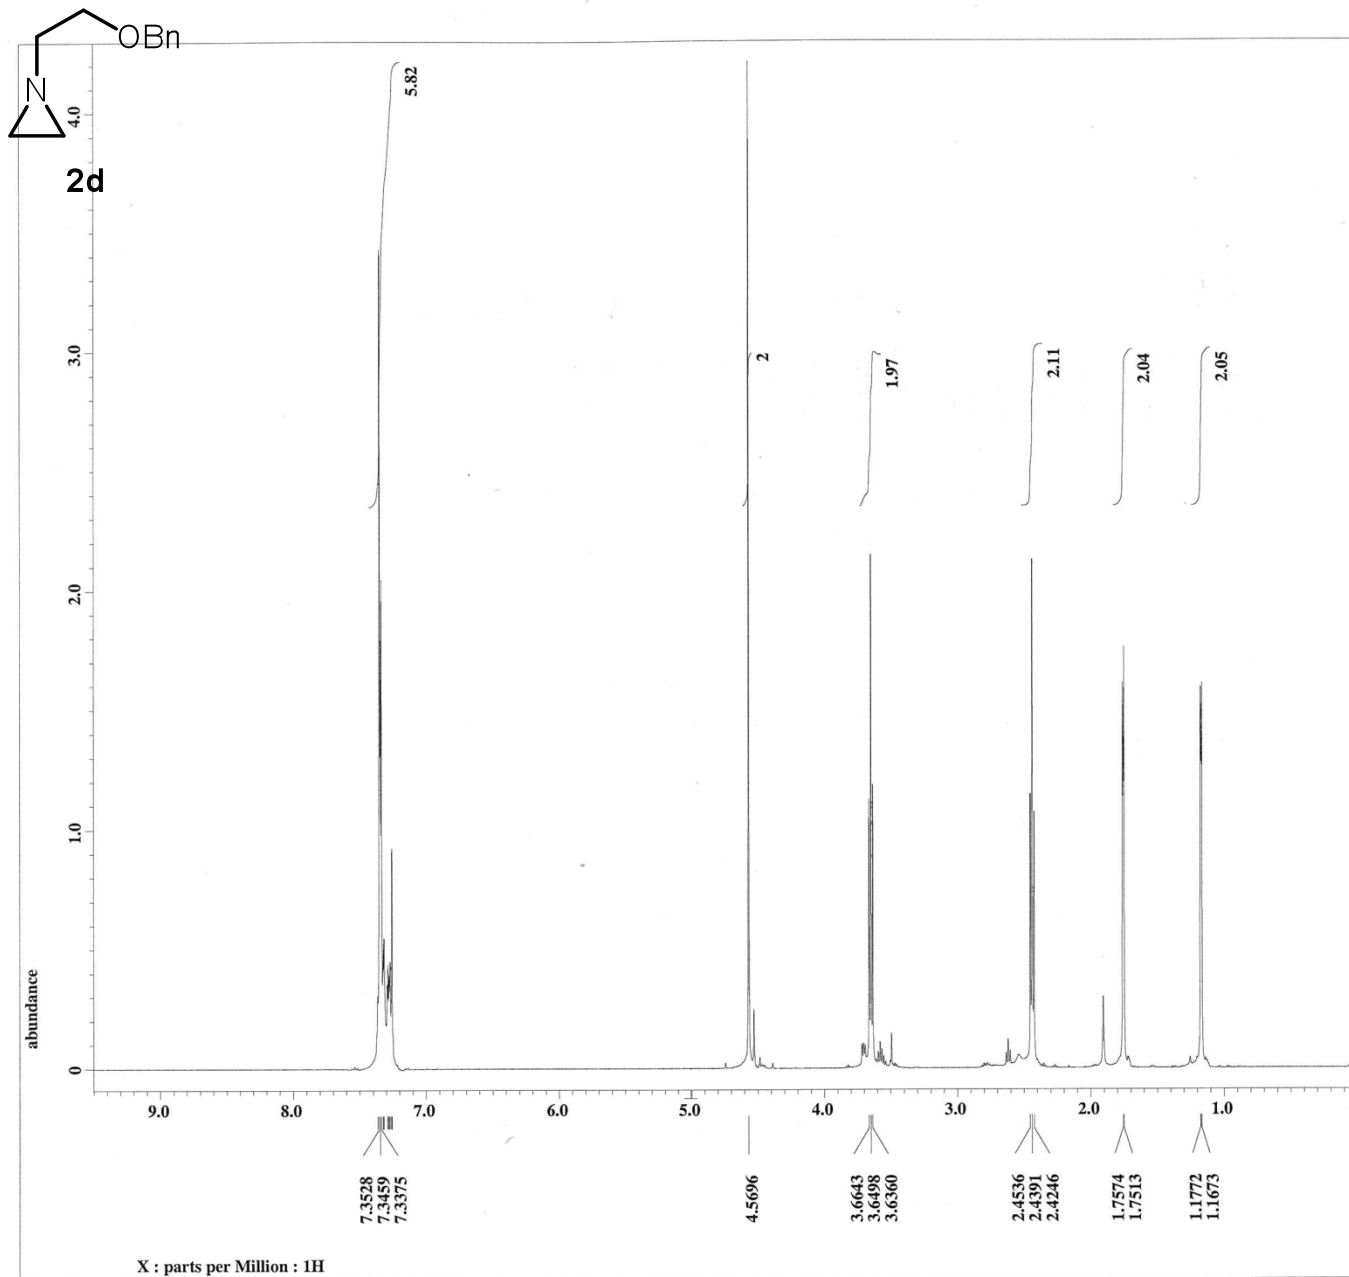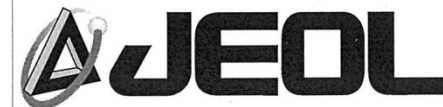

----- PROCESSING PARAMETERS -----  
 dc\_balance : 0 : FALSE  
 sexp : 0.2[Hz] : 0.0[s]  
 trapezoid3 : 0[%] : 80[%] : 100[%]  
 zerofill : 1  
 fft : 1 : TRUE : TRUE  
 machinephase  
 ppm  
 base\_correct : None : 0 : Smooth  
 reference : 7.253[ppm] : 7.26[ppm]  
 Derived from: 80-Bnaz,r.t.,1H,CDC13-1.jd

Filename = 80-Bnaz,r.t.,1H,CDC13  
 Author = delta  
 Experiment = single\_pulse.ex2  
 Sample\_id = 1  
 Solvent = CHLOROFORM-D  
 Creation\_time = 21-FEB-2012 11:34:42  
 Revision\_time = 21-FEB-2012 11:40:02  
 Current\_time = 21-FEB-2012 11:40:23

Comment = single\_pulse  
 Data\_format = 1D REAL  
 Dim\_size = 26214  
 Dim\_title = 1H  
 Dim\_units = [ppm]  
 Dimensions = X  
 Site = ECX 400P  
 Spectrometer = DELTA2\_NMR

Field\_strength = 9.389766[T] (400[MHz])  
 X\_acq\_duration = 3.2768[s]  
 X\_domain = 1H  
 X\_freq = 399.78219838[MHz]  
 X\_offset = 5[ppm]  
 X\_points = 32768  
 X\_prescans = 0  
 X\_resolution = 0.30517578[Hz]  
 X\_sweep = 10[kHz]  
 Irr\_domain = 1H  
 Irr\_freq = 399.78219838[MHz]  
 Irr\_offset = 5[ppm]  
 Tri\_domain = 1H  
 Tri\_freq = 399.78219838[MHz]  
 Tri\_offset = 5[ppm]  
 Clipped = FALSE  
 Mod\_return = 1  
 Scans = 8  
 Total\_scans = 8

X\_90\_width = 13.2[us]  
 X\_acq\_time = 3.2768[s]  
 X\_angle = 45[deg]  
 X\_atn = 2.1[dB]  
 X\_pulse = 6.6[us]  
 Irr\_mode = Off  
 Tri\_mode = Off  
 Dante\_presat = FALSE  
 Initial\_wait = 1[s]  
 Recvr\_gain = 40  
 Relaxation\_delay = 2[s]  
 Repetition\_time = 5.2768[s]  
 Temp\_get = 24.7[°C]

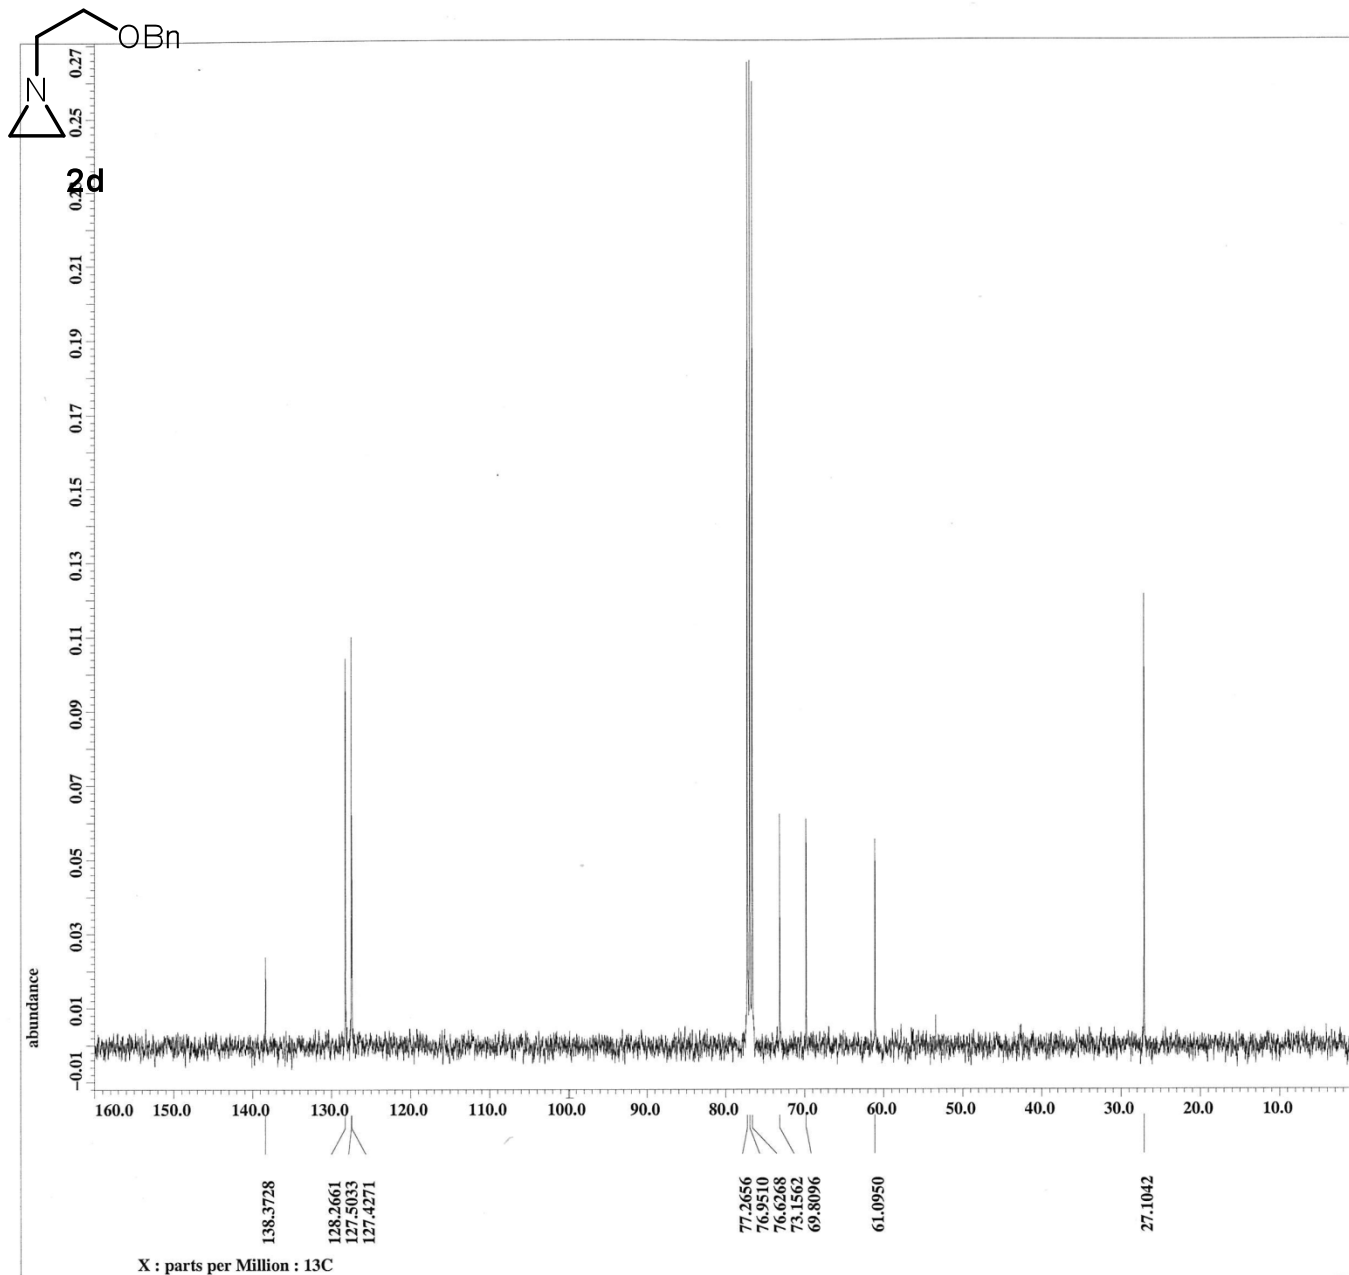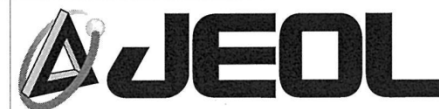

----- PROCESSING PARAMETERS -----  
dc\_balance : 0 : FALSE  
sexp : 2.0 [Hz] : 0.0 [s]  
trapezoid3 : 0 [%] : 80 [%] : 100 [%]  
zerofill : 1  
fft : 1 : TRUE : TRUE  
machinephase  
ppm  
reference : 77.166 [ppm] : 77 [ppm]  
Derived from: 80-Bnaz,r.t.,13C,CDC13-1.j

Filename = 80-Bnaz,r.t.,13C,CDC1  
Author = delta  
Experiment = single\_pulse\_dec  
Sample\_id = 1  
Solvent = CHLOROFORM-D  
Creation\_time = 21-FEB-2012 11:43:15  
Revision\_time = 21-FEB-2012 11:47:08  
Current\_time = 21-FEB-2012 11:47:33

Comment = single pulse decouple  
Data\_format = 1D COMPLEX  
Dim\_size = 26214  
Dim\_title = 13C  
Dim\_units = [ppm]  
Dimensions = X  
Site = ECX 400P  
Spectrometer = DELTA2\_NMR

Field\_strength = 9.389766 [T] (400 [MHz])  
X\_acq\_duration = 1.04333312 [s]  
X\_domain = 13C  
X\_freq = 100.52530333 [MHz]  
X\_offset = 100 [ppm]  
X\_points = 32768  
X\_prescans = 2  
X\_resolution = 0.95846665 [Hz]  
X\_sweep = 31.40703518 [kHz]  
Irr\_domain = 1H  
Irr\_freq = 399.78219838 [MHz]  
Irr\_offset = 5 [ppm]  
Clipped = FALSE  
Mod\_return = 1  
Scans = 70  
Total\_scans = 70

X\_90\_width = 8.5 [us]  
X\_acq\_time = 1.04333312 [s]  
X\_angle = 30 [deg]  
X\_atn = 3.6 [dB]  
X\_pulse = 2.83333333 [us]  
Irr\_atn\_dec = 20.356 [dB]  
Irr\_atn\_noe = 20.356 [dB]  
Irr\_noise = WALTZ  
Decoupling = TRUE  
Initial\_wait = 1 [s]  
Noe = TRUE  
Noe\_time = 3 [s]  
Recvr\_gain = 48  
Relaxation\_delay = 3 [s]  
Repetition\_time = 4.04333312 [s]  
Temp\_get = 25 [dC]

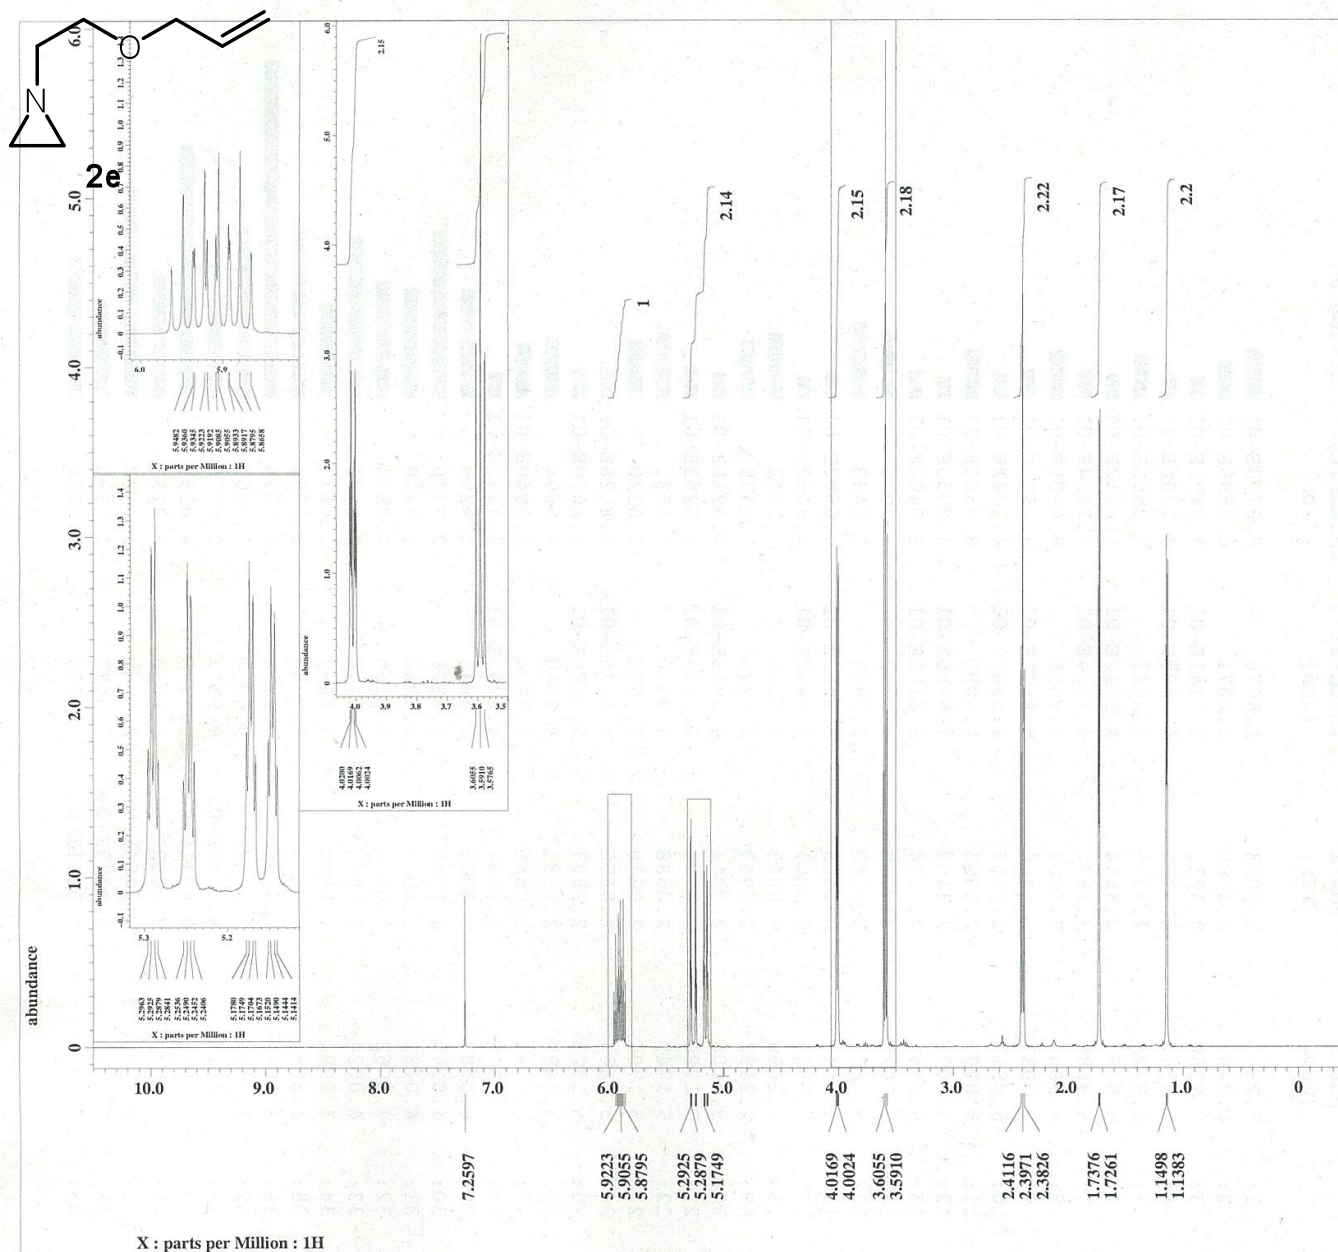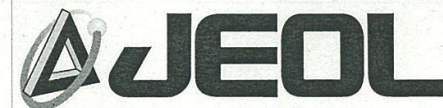

----- PROCESSING PARAMETERS -----  
 dc\_balance : 0 : FALSE  
 sexp : 0.2[Hz] : 0.0[s]  
 trapezoid3 : 0[%] : 80[%] : 100[%]  
 zerofill : 1  
 fft : 1 : TRUE : TRUE  
 machinephase  
 ppm  
 base\_correct : None : 0 : Smooth  
 reference : 7.253[ppm] : 7.26[ppm]  
 Derived from: 80-allyl,r.t.,1H,CDC13-1.j

Filename = 80-allyl,r.t.,1H,CDC1  
 Author = delta  
 Experiment = single\_pulse.ex2  
 Sample\_id = 1  
 Solvent = CHLOROFORM-D  
 Creation\_time = 21-MAY-2011 11:53:36  
 Revision\_time = 21-MAY-2011 11:56:36  
 Current\_time = 21-MAY-2011 11:56:52

Comment = single\_pulse  
 Data\_format = 1D REAL  
 Dim\_size = 26214  
 Dim\_title = 1H  
 Dim\_units = [ppm]  
 Dimensions = X  
 Site = ECX 400P  
 Spectrometer = DELTA2\_NMR

Field\_strength = 9.389766[T] (400[MHz])  
 X\_acq\_duration = 3.2768[s]  
 X\_domain = 1H  
 X\_freq = 399.78219838[MHz]  
 X\_offset = 5[ppm]  
 X\_points = 32768  
 X\_prescans = 0  
 X\_resolution = 0.30517578[Hz]  
 X\_sweep = 10[kHz]  
 Irr\_domain = 1H  
 Irr\_freq = 399.78219838[MHz]  
 Irr\_offset = 5[ppm]  
 Tri\_domain = 1H  
 Tri\_freq = 399.78219838[MHz]  
 Tri\_offset = 5[ppm]  
 Clipped = FALSE  
 Mod\_return = 1  
 Scans = 8  
 Total\_scans = 8

X\_90\_width = 13.2[us]  
 X\_acq\_time = 3.2768[s]  
 X\_angle = 45[deg]  
 X\_atn = 2.1[db]  
 X\_pulse = 6.6[us]  
 Irr\_mode = Off  
 Tri\_mode = Off  
 Dante\_preset = FALSE  
 Initial\_wait = 1[s]  
 Recvr\_gain = 36  
 Relaxation\_delay = 2[s]  
 Repetition\_time = 5.2768[s]  
 Temp\_get = 25.6[dc]

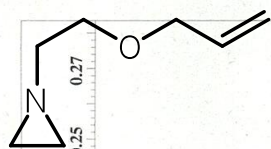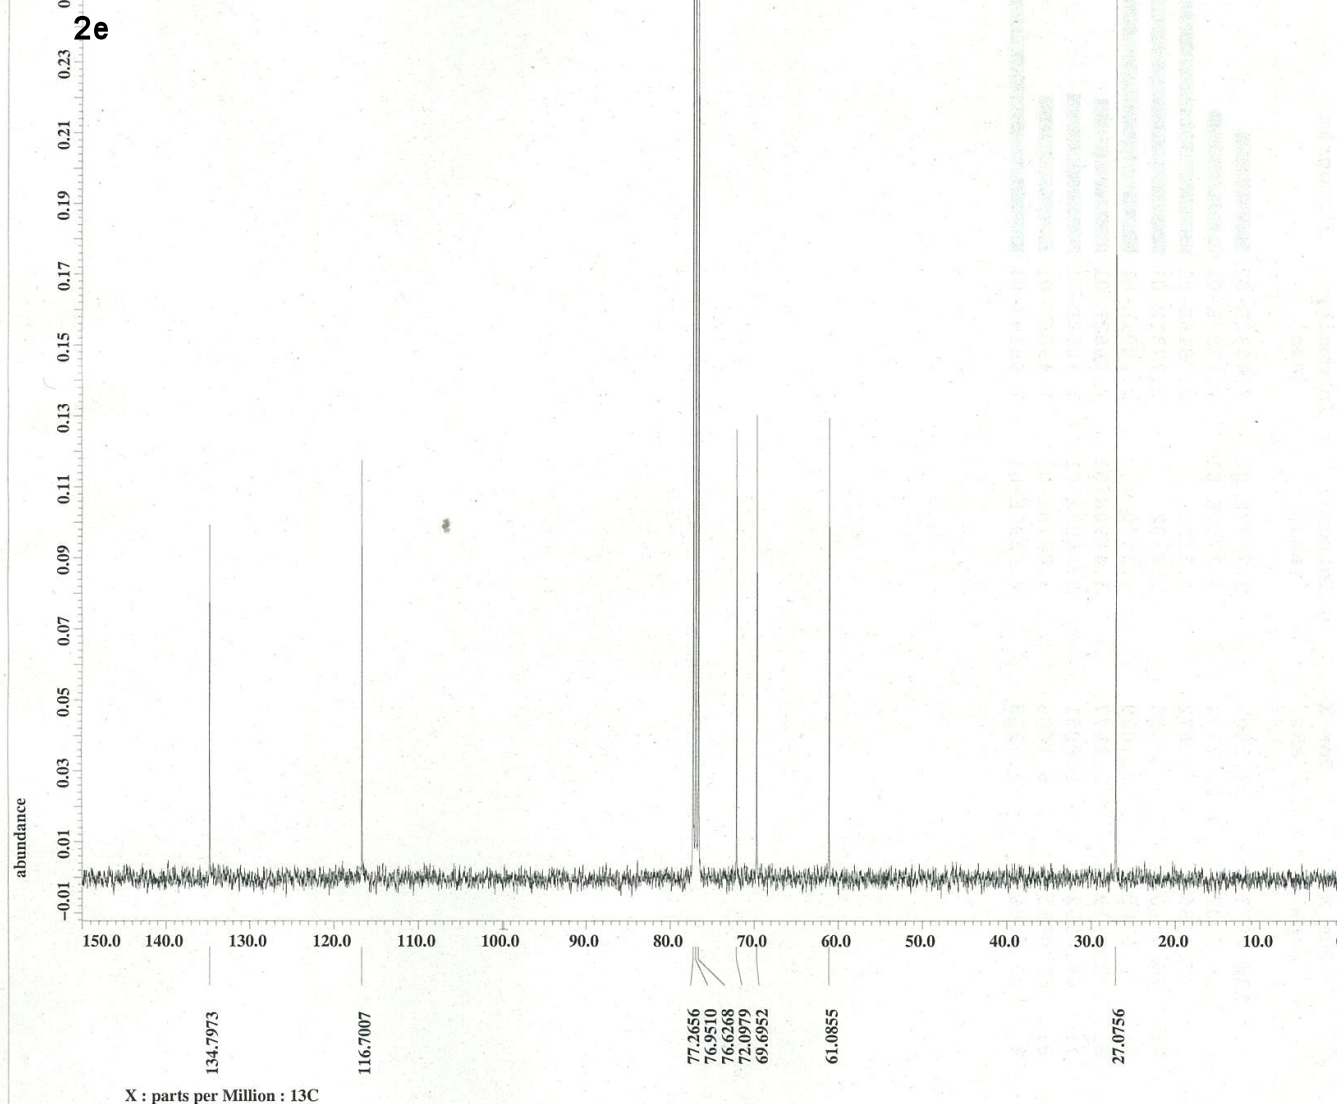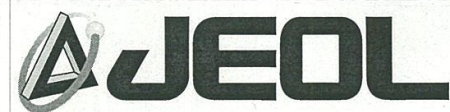

---- PROCESSING PARAMETERS ----  
dc\_balance : 0 : FALSE  
sexp : 2.0 [Hz] : 0.0 [s]  
trapezoid3 : 0 [%] : 80 [%] : 100 [%]  
zerofill : 1  
fft : 1 : TRUE : TRUE  
machinephase  
ppm  
reference : 77.166 [ppm] : 77 [ppm]  
Derived from: 80-allyl,r.t.,13C,CDCl3-1.

Filename = 80-allyl,r.t.,13C,CDC  
Author = delta  
Experiment = single\_pulse\_dec  
Sample\_id = 1  
Solvent = CHLOROFORM-D  
Creation\_time = 21-MAY-2011 11:47:36  
Revision\_time = 21-MAY-2011 11:47:21  
Current\_time = 21-MAY-2011 11:48:10

Comment = single pulse decouple  
Data\_format = 1D COMPLEX  
Dim\_size = 26214  
Dim\_title = 13C  
Dim\_units = [ppm]  
Dimensions = X  
Site = ECX 400P  
Spectrometer = DELTA2\_NMR

Field\_strength = 9.389766 [T] (400 [MHz])  
X\_acq\_duration = 1.04333312 [s]  
X\_domain = 13C  
X\_freq = 100.52530333 [MHz]  
X\_offset = 100 [ppm]  
X\_points = 32768  
X\_prescans = 2  
X\_resolution = 0.95846665 [Hz]  
X\_sweep = 31.40703518 [kHz]  
Irr\_domain = 1H  
Irr\_freq = 399.78219838 [MHz]  
Irr\_offset = 5 [ppm]  
Clipped = FALSE  
Mod\_return = 1  
Scans = 94  
Total\_scans = 94

X\_90\_width = 8.5 [us]  
X\_acq\_time = 1.04333312 [s]  
X\_angle = 30 [deg]  
X\_atn = 3.6 [dB]  
X\_pulse = 2.83333333 [us]  
Irr\_atn\_dec = 20.356 [dB]  
Irr\_atn\_noe = 20.356 [dB]  
Irr\_noise = WALFZ  
Decoupling = TRUE  
Initial\_wait = 1 [s]  
Noe = TRUE  
Noe\_time = 3 [s]  
Recvr\_gain = 48  
Relaxation\_delay = 3 [s]  
Repetition\_time = 4.04333312 [s]  
Temp\_get = 25.4 [dC]

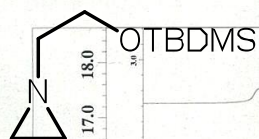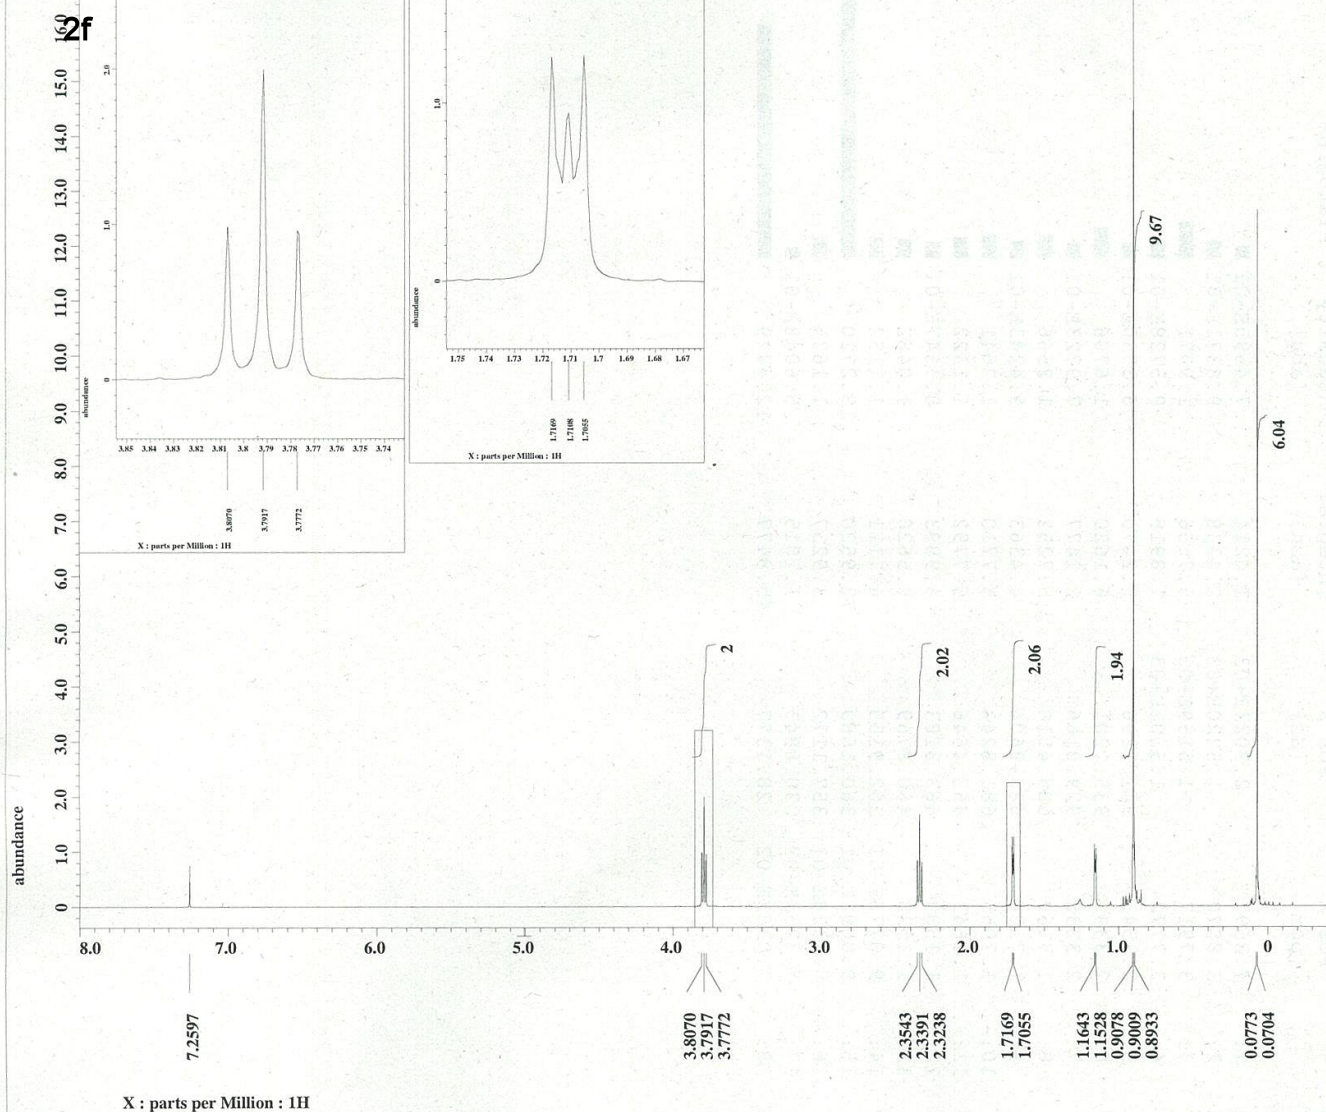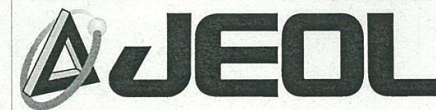

----- PROCESSING PARAMETERS -----  
 dc\_balance : 0 : FALSE  
 secp : 0.2[Hz] : 0.0[s]  
 trapezoid3 : 0[%] : 80[%] : 100[%]  
 zerofill : 1  
 fft : 1 : TRUE : TRUE  
 machinephase  
 ppm  
 base\_correct : None : 0 : Smooth  
 reference : 7.253[ppm] : 7.26[ppm]  
 Derived from: 80-1125,r.t.,1H,CDC13-1.jd

Filename = 80-1125,r.t.,1H,CDC13  
 Author = delta  
 Experiment = single\_pulse.ex2  
 Sample\_id = 1  
 Solvent = CHLOROFORM-D  
 Creation\_time = 26-MAY-2011 16:18:14  
 Revision\_time = 26-MAY-2011 16:19:32  
 Current\_time = 26-MAY-2011 16:20:23

Comment = single\_pulse  
 Data\_format = 1D REAL  
 Dim\_size = 26214  
 Dim\_title = 1H  
 Dim\_units = [ppm]  
 Dimensions = X  
 Site = ECX 400P  
 Spectrometer = DELTA2\_NMR

Field\_strength = 9.389766[T] (400[MHz])  
 X\_acq\_duration = 3.2768[s]  
 X\_domain = 1H  
 X\_freq = 399.78219838[MHz]  
 X\_offset = 5[ppm]  
 X\_points = 32768  
 X\_prescans = 0  
 X\_resolution = 0.30517578[Hz]  
 X\_sweep = 10[kHz]  
 Irr\_domain = 1H  
 Irr\_freq = 399.78219838[MHz]  
 Irr\_offset = 5[ppm]  
 Tri\_domain = 1H  
 Tri\_freq = 399.78219838[MHz]  
 Tri\_offset = 5[ppm]  
 Clipped = FALSE  
 Mod\_return = 1  
 Scans = 8  
 Total\_scans = 8

X\_90\_width = 13.2[us]  
 X\_acq\_time = 3.2768[s]  
 X\_angle = 45[deg]  
 X\_atn = 2.1[dB]  
 X\_pulse = 6.6[us]  
 Irr\_mode = Off  
 Tri\_mode = Off  
 Dante\_presat = FALSE  
 Initial\_wait = 1[s]  
 Recvr\_gain = 36  
 Relaxation\_delay = 2[s]  
 Repetition\_time = 5.2768[s]  
 Temp\_get = 25.6[dc]



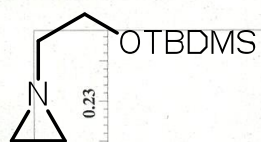

2f

abundance

130.0 120.0 110.0 100.0 90.0 80.0 70.0 60.0 50.0 40.0 30.0 20.0 10.0 0 -10.0 -20.0

77.2370  
76.9224  
76.6078

63.6026  
62.9828

26.8659  
25.8552

18.2466

-5.4373

X : parts per Million : 13C

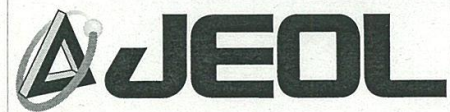

----- PROCESSING PARAMETERS -----  
dc\_balance : 0 : FALSE  
sexp : 2.0[Hz] : 0.0[s]  
trapezoid3 : 0[%] : 80[%] : 100[%]  
zerofill : 1  
fft : 1 : TRUE : TRUE  
machinephase  
ppm  
reference : 77.166[ppm] : 77[ppm]  
Derived from: 80-1125,r.t.13C,CDC13-1.jd

Filename = 80-1125,r.t.13C,CDC13  
Author = delta  
Experiment = single\_pulse\_dec  
Sample\_id = 1  
Solvent = CHLOROFORM-D  
Creation\_time = 26-MAY-2011 16:26:51  
Revision\_time = 26-MAY-2011 16:26:42  
Current\_time = 26-MAY-2011 16:28:06

Comment = single pulse decouple  
Data\_format = 1D COMPLEX  
Dim\_size = 26214  
Dim\_title = 13C  
Dim\_units = [ppm]  
Dimensions = X  
Site = ECX 400P  
Spectrometer = DELTA2\_NMR

Field\_strength = 9.389766[T] (400[MHz])  
X\_acq\_duration = 1.0433312[s]  
X\_domain = 13C  
X\_freq = 100.52530333[MHz]  
X\_offset = 100[ppm]  
X\_points = 32768  
X\_prescans = 2  
X\_resolution = 0.95846665[Hz]  
X\_sweep = 31.40703518[kHz]  
Irr\_domain = 1H  
Irr\_freq = 399.78219838[MHz]  
Irr\_offset = 5[ppm]  
Clipped = FALSE  
Mod\_return = 1  
Scans = 62  
Total\_scans = 62

X\_90\_width = 8.5[us]  
X\_acq\_time = 1.04333312[s]  
X\_angle = 30[deg]  
X\_atn = 3.6[dB]  
X\_pulse = 2.83333333[us]  
Irr\_atn\_dec = 20.356[dB]  
Irr\_atn\_noe = 20.356[dB]  
Irr\_noise = WALTZ  
Decoupling = TRUE  
Initial\_wait = 1[s]  
Noe = TRUE  
Noe\_time = 3[s]  
Recvr\_gain = 46  
Relaxation\_delay = 3[s]  
Repetition\_time = 4.04333312[s]  
Temp\_get = 25.6[dc]

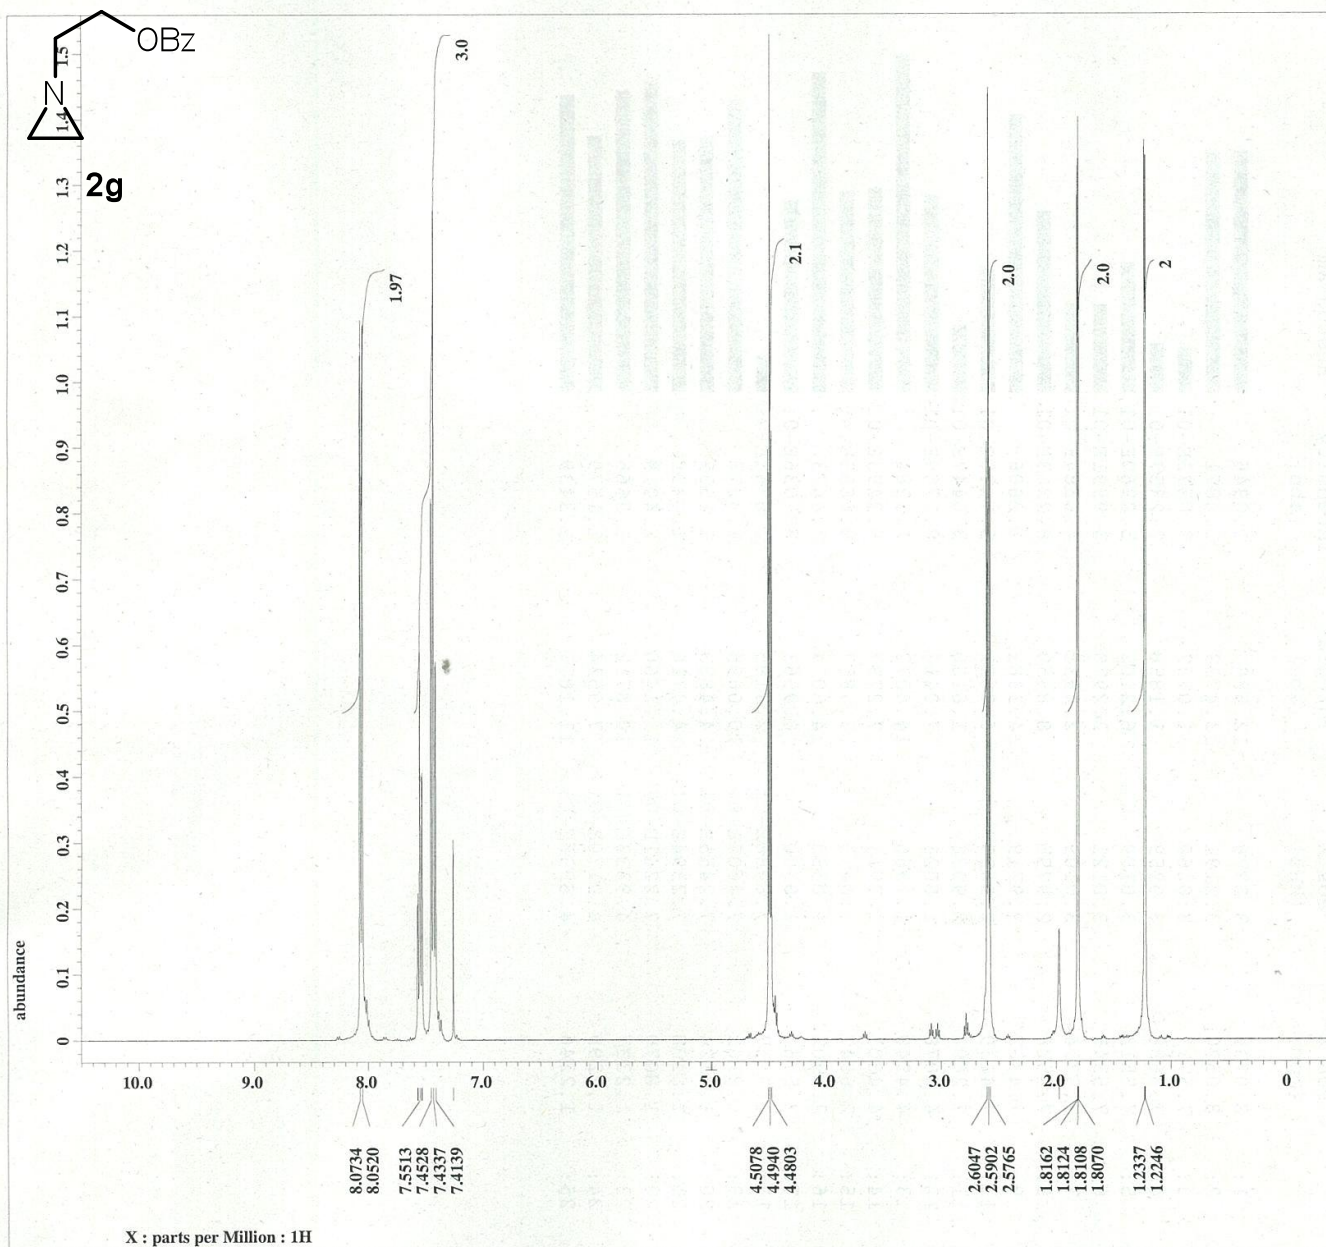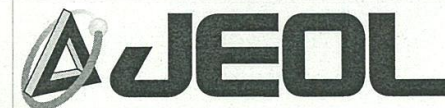

----- PROCESSING PARAMETERS -----  
 dc\_balance : 0 : FALSE  
 sexp : 0.2[Hz] : 0.0[s]  
 trapezoid3 : 0[%] : 80[%] : 100[%]  
 zerofill : 1  
 fft : 1 : TRUE : TRUE  
 machinephase  
 ppm  
 base\_correct : None : 0 : Smooth  
 reference : 7.253[ppm] : 7.26[ppm]  
 Derived from: 80-Bzoxethylaz,r.t.,1H,CD

Filename = 80-Bzoxethylaz,r.t.,  
 Author = delta  
 Experiment = single\_pulse.ex2  
 Sample\_id = 1  
 Solvent = CHLOROFORM-D  
 Creation\_time = 20-MAY-2011 11:24:16  
 Revision\_time = 20-MAY-2011 11:39:40  
 Current\_time = 20-MAY-2011 11:39:49

Comment = single\_pulse  
 Data\_format = 1D REAL  
 Dim\_size = 26214  
 Dim\_title = 1H  
 Dim\_units = [ppm]  
 Dimensions = X  
 Site = ECX 400P  
 Spectrometer = DELTA2\_NMR

Field\_strength = 9.389766[T] (400[MHz])  
 X\_acq\_duration = 3.2768[s]  
 X\_domain = 1H  
 X\_freq = 399.78219838[MHz]  
 X\_offset = 5[ppm]  
 X\_points = 32768  
 X\_prescans = 0  
 X\_resolution = 0.30517578[Hz]  
 X\_sweep = 10[kHz]  
 Irr\_domain = 1H  
 Irr\_freq = 399.78219838[MHz]  
 Irr\_offset = 5[ppm]  
 Tri\_domain = 1H  
 Tri\_freq = 399.78219838[MHz]  
 Tri\_offset = 5[ppm]  
 Clipped = FALSE  
 Mod\_return = 1  
 Scans = 8  
 Total\_scans = 8

X\_90\_width = 13.2[us]  
 X\_acq\_time = 3.2768[s]  
 X\_angle = 45[deg]  
 X\_atn = 2.1[db]  
 X\_pulse = 6.6[us]  
 Irr\_mode = Off  
 Tri\_mode = Off  
 Dante\_presat = FALSE  
 Initial\_wait = 1[s]  
 Recvr\_gain = 36  
 Relaxation\_delay = 2[s]  
 Repetition\_time = 5.2768[s]  
 Temp\_get = 25.2[dc]

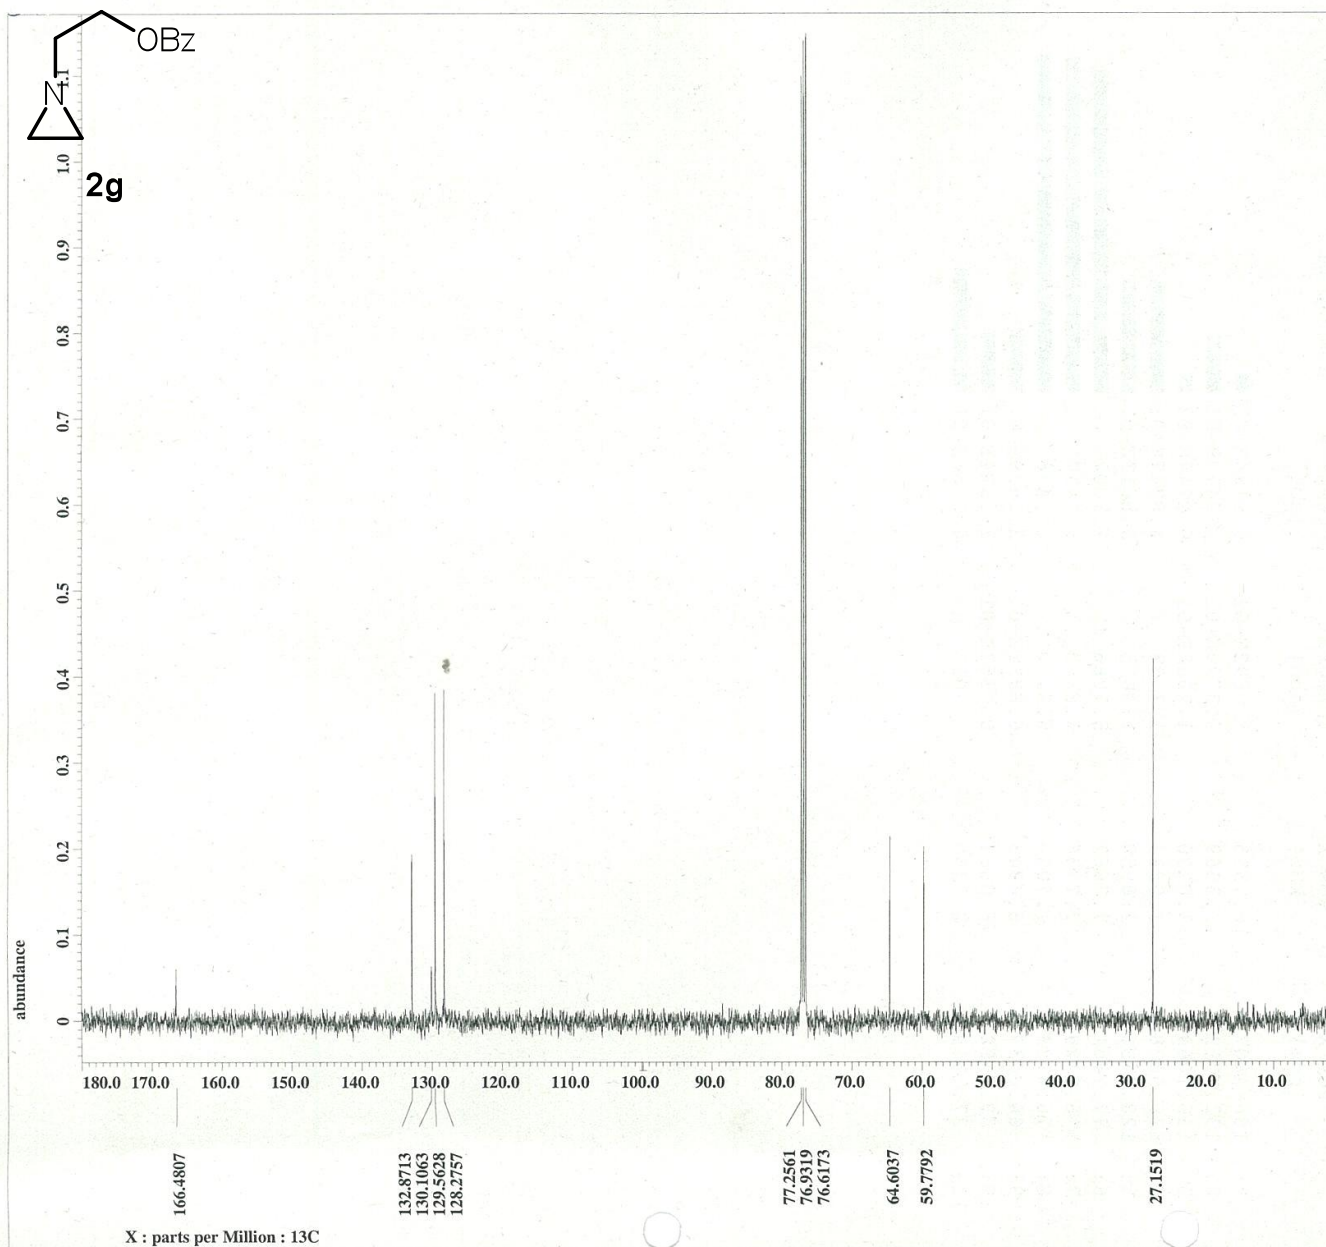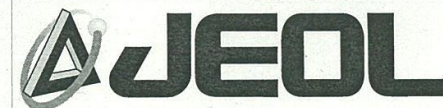

---- PROCESSING PARAMETERS ----  
dc\_balance : 0 : FALSE  
sexp : 2.0[Hz] : 0.0[s]  
trapezoid3 : 0[%] : 80[%] : 100[%]  
zerofill : 1  
fft : 1 : TRUE : TRUE  
machinephase  
ppm  
reference : 77.166[ppm] : 77[ppm]  
Derived from: 80-1089,r.t.,13C,CDC13-1.j

Filename = 80-1089,r.t.,13C,CDC1  
Author = delta  
Experiment = single\_pulse\_dec  
Sample\_id = 1  
Solvent = CHLOROFORM-D  
Creation\_time = 10-MAY-2011 16:00:28  
Revision\_time = 10-MAY-2011 15:59:53  
Current\_time = 10-MAY-2011 16:00:24

Comment = single pulse decouple  
Data\_format = 1D COMPLEX  
Dim\_size = 26214  
Dim\_title = 13C  
Dim\_units = [ppm]  
Dimensions = X  
Site = ECX 400P  
Spectrometer = DELTA2\_NMR

Field\_strength = 9.389766[T] (400[MHz])  
X\_acq\_duration = 1.04333312[s]  
X\_domain = 13C  
X\_freq = 100.52530333[MHz]  
X\_offset = 100[ppm]  
X\_points = 32768  
X\_prescans = 2  
X\_resolution = 0.95846665[Hz]  
X\_sweep = 31.40703518[kHz]  
Irr\_domain = 1H  
Irr\_freq = 399.78219838[MHz]  
Irr\_offset = 5[ppm]  
Clipped = TRUE  
Mod\_return = 1  
Scans = 85  
Total\_scans = 85

X\_90\_width = 8.5[us]  
X\_acq\_time = 1.04333312[s]  
X\_angle = 30[deg]  
X\_atn = 3.6[db]  
X\_pulse = 2.83333333[us]  
Irr\_atn\_dec = 20.356[db]  
Irr\_atn\_noe = 20.356[db]  
Irr\_noise = WALTZ  
Decoupling = TRUE  
Initial\_wait = 1[s]  
Noe = TRUE  
Noe\_time = 3[s]  
Recvr\_gain = 60  
Relaxation\_delay = 3[s]  
Repetition\_time = 4.04333312[s]  
Temp\_get = 26.4[dc]

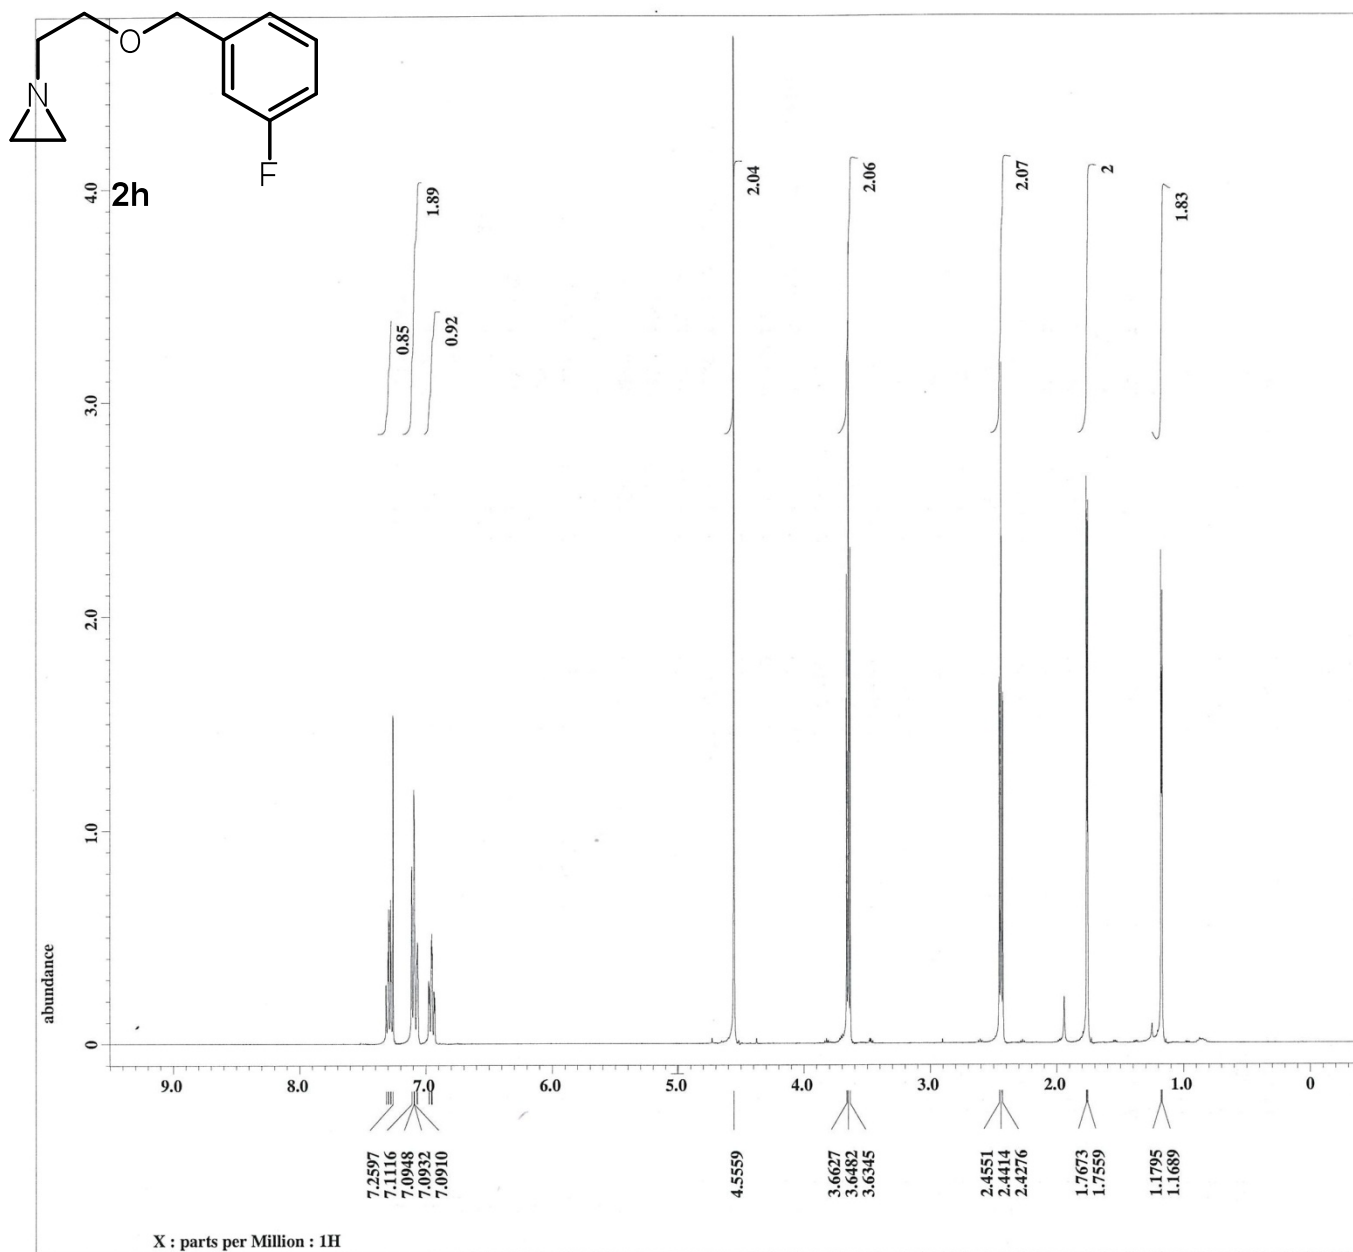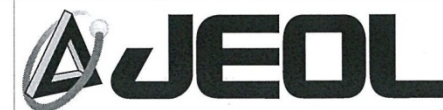

---- PROCESSING PARAMETERS ----  
 dc\_balance : 0 : FALSE  
 secp : 0.2[Hz] : 0.0[s]  
 trapezoid3 : 0[%] : 80[%] : 100[%]  
 zerofill : 1  
 fft : 1 : TRUE : TRUE  
 machinephase  
 ppm  
 base\_correct : None : 0 : Smooth  
 reference : 7.253[ppm] : 7.26[ppm]  
 Derived from: 80-1439,r.t.,1H,CDC13-2.jd

Filename = 80-1439,r.t.,1H,CDC13  
 Author = delta  
 Experiment = single\_pulse.ex2  
 Sample\_id = 1  
 Solvent = CHLOROFORM-D  
 Creation\_time = 20-JAN-2012 15:28:35  
 Revision\_time = 20-JAN-2012 15:35:25  
 Current\_time = 20-JAN-2012 15:35:51

Comment = single\_pulse  
 Data\_format = 1D REAL  
 Dim\_size = 26214  
 Dim\_title = 1H  
 Dim\_units = [ppm]  
 Dimensions = X  
 Site = ECX 400P  
 Spectrometer = DELTA2\_NMR

Field\_strength = 9.389766[T] (400[MHz])  
 X\_acq\_duration = 3.2768[s]  
 X\_domain = 1H  
 X\_freq = 399.78219838[MHz]  
 X\_offset = 5[ppm]  
 X\_points = 32768  
 X\_prescans = 0  
 X\_resolution = 0.30517578[Hz]  
 X\_sweep = 10[kHz]  
 Irr\_domain = 1H  
 Irr\_freq = 399.78219838[MHz]  
 Irr\_offset = 5[ppm]  
 Tri\_domain = 1H  
 Tri\_freq = 399.78219838[MHz]  
 Tri\_offset = 5[ppm]  
 Clipped = FALSE  
 Mod\_return = 1  
 Scans = 8  
 Total\_scans = 8

X\_90\_width = 13.2[us]  
 X\_acq\_time = 3.2768[s]  
 X\_angle = 45[deg]  
 X\_atn = 2.1[dB]  
 X\_pulse = 6.6[us]  
 Irr\_mode = Off  
 Tri\_mode = Off  
 Dante\_presat = FALSE  
 Initial\_wait = 1[s]  
 Recvr\_gain = 38  
 Relaxation\_delay = 2[s]  
 Repetition\_time = 5.2768[s]  
 Temp\_get = 24[degC]

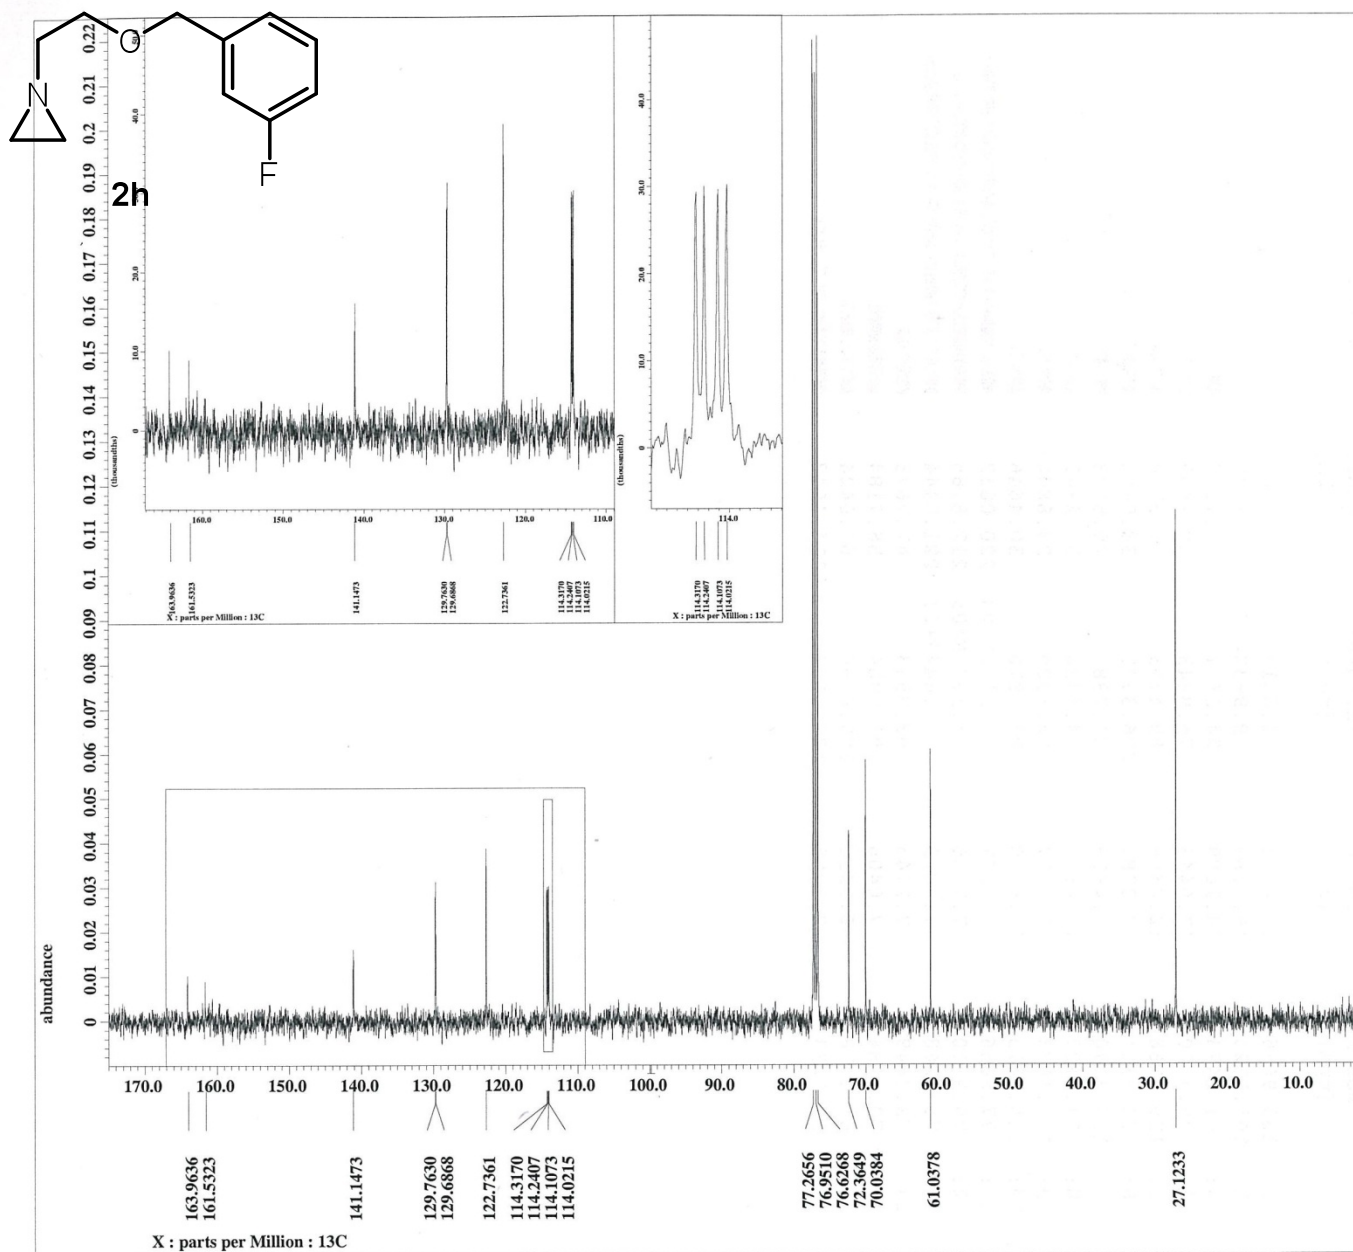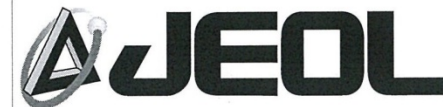

----- PROCESSING PARAMETERS -----  
 dc\_balance : 0 : FALSE  
 sexp : 2.0[Hz] : 0.0[s]  
 trapezoid3 : 0[%] : 80[%] : 100[%]  
 zerofill : 1  
 fft : 1 : TRUE : TRUE  
 machinephase  
 ppm  
 reference : 77.166[ppm] : 77[ppm]  
 Derived from: 80-1439,r.t.,13C,CDC13-2.j

Filename = 80-1439,r.t.,13C,CDC1  
 Author = delta  
 Experiment = single\_pulse\_dec  
 Sample\_id = 1  
 Solvent = CHLOROFORM-D  
 Creation\_time = 20-JAN-2012 15:56:53  
 Revision\_time = 20-JAN-2012 16:02:49  
 Current\_time = 20-JAN-2012 16:04:29

Comment = single pulse decouple  
 Data\_format = 1D COMPLEX  
 Dim\_size = 26214  
 Dim\_title = 13C  
 Dim\_units = [ppm]  
 Dimensions = X  
 Site = ECX 400P  
 Spectrometer = DELTA2\_NMR

Field\_strength = 9.389766[T] (400[MHz])  
 X\_acq\_duration = 1.04333312[s]  
 X\_domain = 13C  
 X\_freq = 100.52530333[MHz]  
 X\_offset = 100[ppm]  
 X\_points = 32768  
 X\_prescans = 2  
 X\_resolution = 0.95846665[Hz]  
 X\_sweep = 31.40703518[kHz]  
 Irr\_domain = 1H  
 Irr\_freq = 399.78219838[MHz]  
 Irr\_offset = 5[ppm]  
 Clipped = FALSE  
 Mod\_return = 1  
 Scans = 59  
 Total\_scans = 59

X\_90\_width = 8.5[us]  
 X\_acq\_time = 1.04333312[s]  
 X\_angle = 30[deg]  
 X\_atn = 3.6[dB]  
 X\_pulse = 2.83333333[us]  
 Irr\_atn\_dec = 20.356[dB]  
 Irr\_atn\_noe = 20.356[dB]  
 Irr\_noise = WALTZ  
 Decoupling = TRUE  
 Initial\_wait = 1[s]  
 Noe = TRUE  
 Noe\_time = 3[s]  
 Recvr\_gain = 46  
 Relaxation\_delay = 3[s]  
 Repetition\_time = 4.04333312[s]  
 Temp\_get = 24.2[degC]

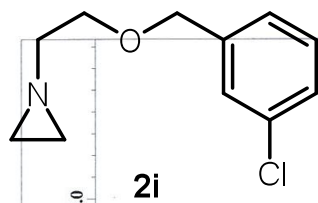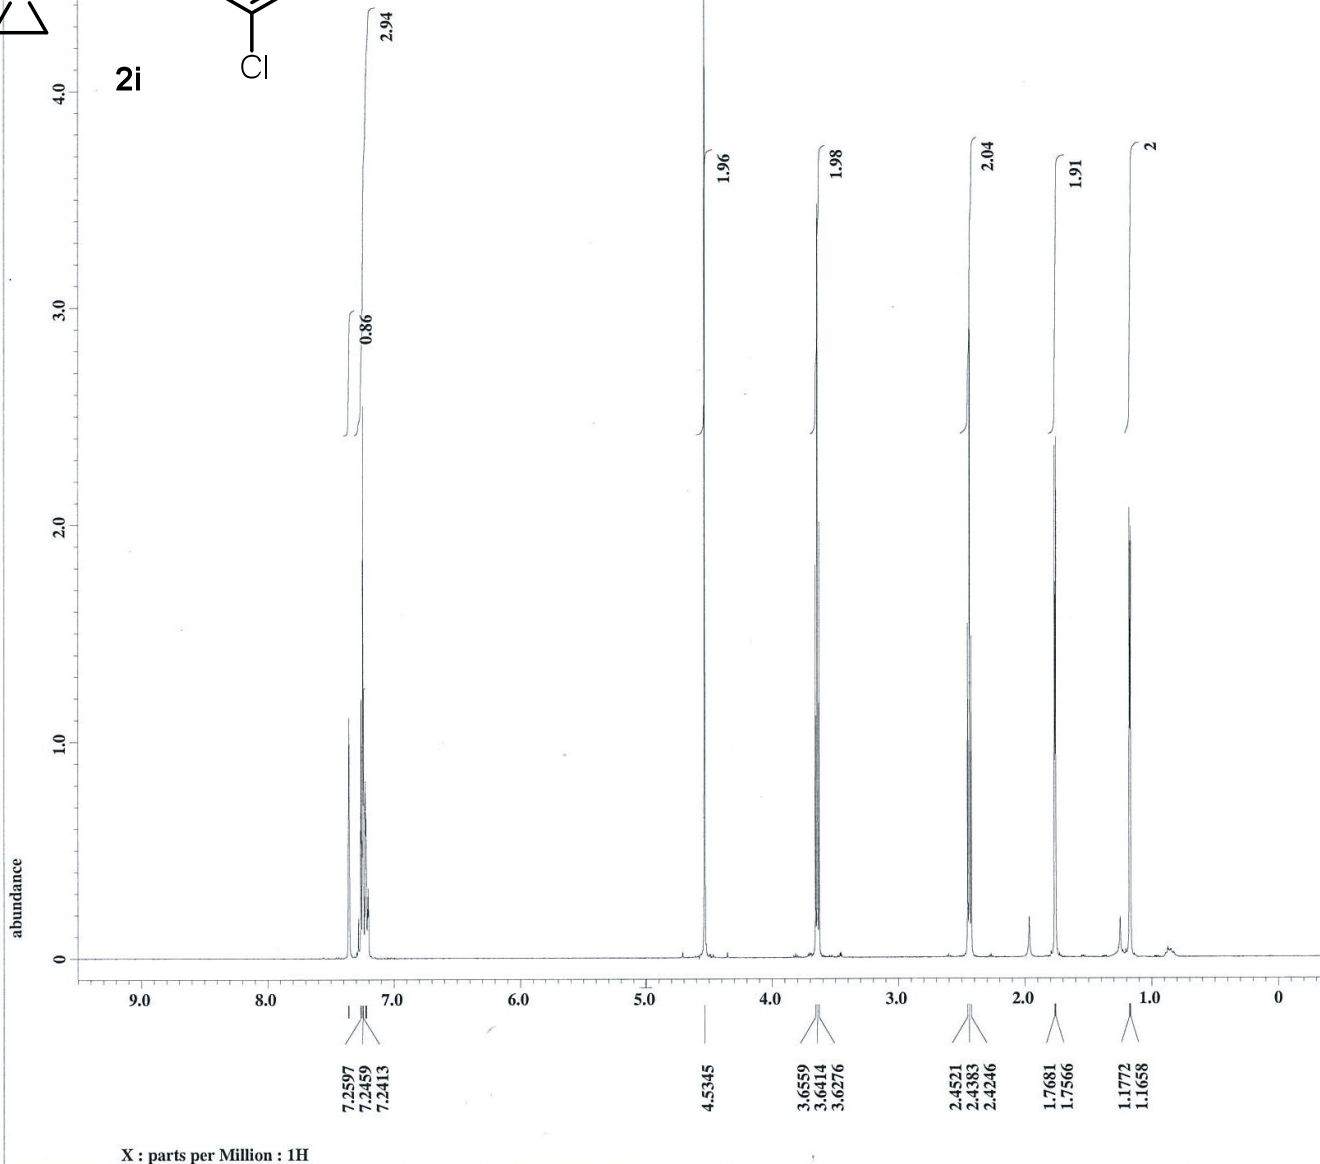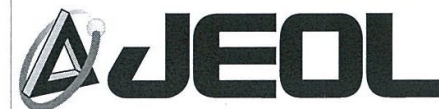

----- PROCESSING PARAMETERS -----  
dc\_balance : 0 : FALSE  
sexp : 0.2[Hz] : 0.0[s]  
trapezoid3 : 0[%] : 80[%] : 100[%]  
zerofill : 1  
fft : 1 : TRUE : TRUE  
machinephase  
ppm  
base\_correct : None : 0 : Smooth  
reference : 7.253[ppm] : 7.26[ppm]  
Derived from: 80-1437,r.t.,1H,CDC13-2.jd

Filename = 80-1437,r.t.,1H,CDC13  
Author = delta  
Experiment = single\_pulse.ex2  
Sample\_id = 1  
Solvent = CHLOROFORM-D  
Creation\_time = 20-JAN-2012 15:23:10  
Revision\_time = 20-JAN-2012 15:31:35  
Current\_time = 20-JAN-2012 15:32:10

Comment = single\_pulse  
Data\_format = 1D REAL  
Dim\_size = 26214  
Dim\_title = 1H  
Dim\_units = [ppm]  
Dimensions = X  
Site = ECX 400P  
Spectrometer = DELTA2\_NMR

Field\_strength = 9.389766[T] (400[MHZ])  
X\_acq\_duration = 3.2768[s]  
X\_domain = 1H  
X\_freq = 399.78219838[MHZ]  
X\_offset = 5[ppm]  
X\_points = 32768  
X\_prescans = 0  
X\_resolution = 0.30517578[Hz]  
X\_sweep = 10[kHz]  
Irr\_domain = 1H  
Irr\_freq = 399.78219838[MHZ]  
Irr\_offset = 5[ppm]  
Tri\_domain = 1H  
Tri\_freq = 399.78219838[MHZ]  
Tri\_offset = 5[ppm]  
Clipped = FALSE  
Mod\_return = 1  
Scans = 8  
Total\_scans = 8

X\_90\_width = 13.2[us]  
X\_acq\_time = 3.2768[s]  
X\_angle = 45[deg]  
X\_atn = 2.1[dB]  
X\_pulse = 6.6[us]  
Irr\_mode = Off  
Tri\_mode = Off  
Dante\_presat = FALSE  
Initial\_wait = 1[s]  
Recvr\_gain = 36  
Relaxation\_delay = 2[s]  
Repetition\_time = 5.2768[s]  
Temp\_get = 24[4C]

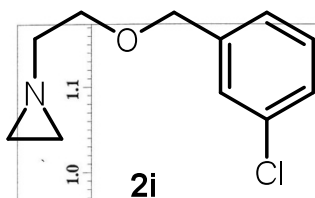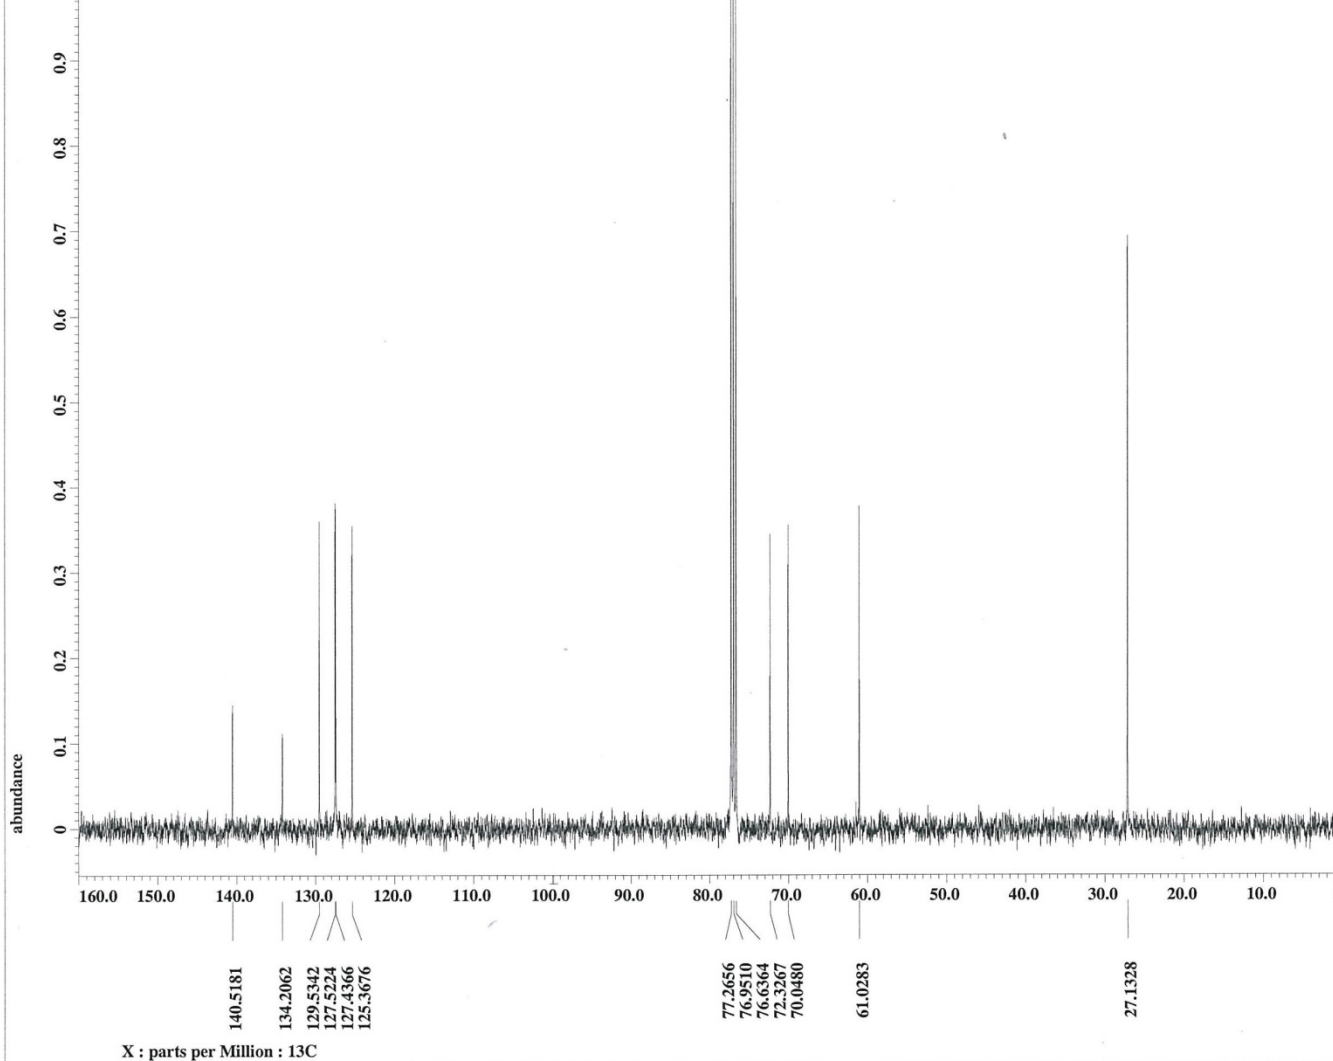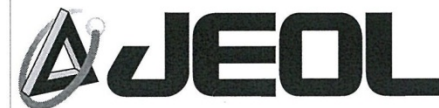

----- PROCESSING PARAMETERS -----  
dc\_balance : 0 : FALSE  
sexp : 2.0 [Hz] : 0.0 [s]  
trapezoid3 : 0 [%] : 80 [%] : 100 [%]  
zerofill : 1  
fft : 1 : TRUE : TRUE  
machinephase  
ppm  
reference : 77.166 [ppm] : 77 [ppm]  
Derived from: 80-1437,r.t.,13C,CDC13-1.j

Filename = 80-1437,r.t.,13C,CDC1  
Author = delta  
Experiment = single\_pulse\_dec  
Sample\_id = 1  
Solvent = CHLOROFORM-D  
Creation\_time = 20-JAN-2012 16:07:15  
Revision\_time = 20-JAN-2012 16:11:49  
Current\_time = 20-JAN-2012 16:12:12

Comment = single pulse decouple  
Data\_format = 1D COMPLEX  
Dim\_size = 26214  
Dim\_title = 13C  
Dim\_units = [ppm]  
Dimensions = X  
Site = ECX 400P  
Spectrometer = DELTA2\_NMR

Field\_strength = 9.389766 [T] (400 [MHz])  
X\_acq\_duration = 1.04333312 [s]  
X\_domain = 13C  
X\_freq = 100.52530333 [MHz]  
X\_offset = 100 [ppm]  
X\_points = 32768  
X\_prescans = 2  
X\_resolution = 0.95846665 [Hz]  
X\_sweep = 31.40703518 [kHz]  
Irr\_domain = 1H  
Irr\_freq = 399.78219838 [MHz]  
Irr\_offset = 5 [ppm]  
Clipped = TRUE  
Mod\_return = 1  
Scans = 50  
Total\_scans = 50

X\_90\_width = 8.5 [us]  
X\_acq\_time = 1.04333312 [s]  
X\_angle = 30 [deg]  
X\_atn = 3.6 [dB]  
X\_pulse = 2.83333333 [us]  
Irr\_atn\_dec = 20.356 [dB]  
Irr\_atn\_noe = 20.356 [dB]  
Irr\_noise = WALTZ  
Decoupling = TRUE  
Initial\_wait = 1 [s]  
Noe = TRUE  
Noe\_time = 3 [s]  
Recvr\_gain = 60  
Relaxation\_delay = 3 [s]  
Repetition\_time = 4.04333312 [s]  
Temp\_get = 24.2 [dC]

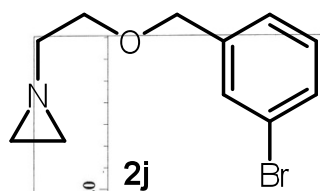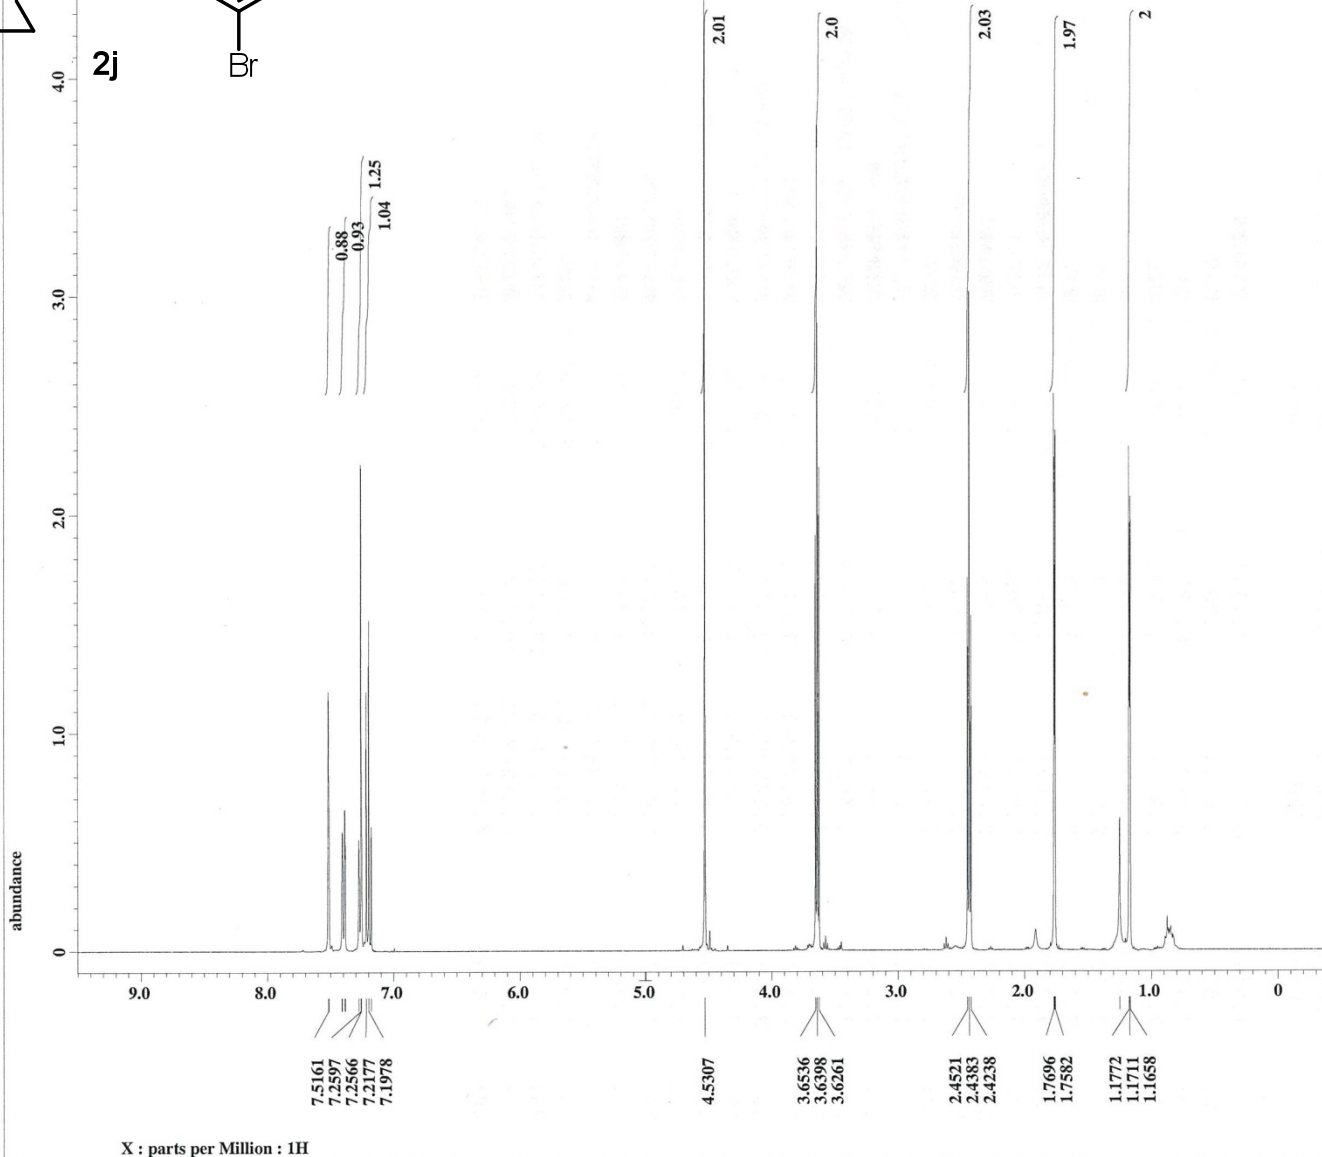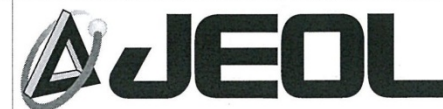

----- PROCESSING PARAMETERS -----  
 dc\_balance : 0 : FALSE  
 secp : 0.2[Hz] : 0.0[s]  
 trapezoid3 : 0[%] : 80[%] : 100[%]  
 zerofill : 1  
 fft : 1 : TRUE : TRUE  
 machinephase  
 ppm  
 base\_correct : None : 0 : Smooth  
 reference : 7.253[ppm] : 7.26[ppm]  
 Derived from: 80-1443,r.t.,1H,CDCl3-2.jd

Filename = 80-1443,r.t.,1H,CDCl3  
 Author = delta  
 Experiment = single\_pulse.ex2  
 Sample\_id = 1  
 Solvent = CHLOROFORM-D  
 Creation\_time = 20-JAN-2012 15:33:21  
 Revision\_time = 20-JAN-2012 15:39:34  
 Current\_time = 20-JAN-2012 15:39:59

Comment = single\_pulse  
 Data\_format = 1D REAL  
 Dim\_size = 26214  
 Dim\_title = 1H  
 Dim\_units = [ppm]  
 Dimensions = X  
 Site = ECX 400P  
 Spectrometer = DELTA2\_NMR

Field\_strength = 9.389766[T] (400[MHz])  
 X\_acq\_duration = 3.2768[s]  
 X\_domain = 1H  
 X\_freq = 399.78219838[MHz]  
 X\_offset = 5[ppm]  
 X\_points = 32768  
 X\_prescans = 0  
 X\_resolution = 0.30517578[Hz]  
 X\_sweep = 10[kHz]  
 Irr\_domain = 1H  
 Irr\_freq = 399.78219838[MHz]  
 Irr\_offset = 5[ppm]  
 Tri\_domain = 1H  
 Tri\_freq = 399.78219838[MHz]  
 Tri\_offset = 5[ppm]  
 Clipped = FALSE  
 Mod\_return = 1  
 Scans = 8  
 Total\_scans = 8

X\_90\_width = 13.2[us]  
 X\_acq\_time = 3.2768[s]  
 X\_angle = 45[deg]  
 X\_atn = 2.1[db]  
 X\_pulse = 6.6[us]  
 Irr\_mode = Off  
 Tri\_mode = Off  
 Dante\_presat = FALSE  
 Initial\_wait = 1[s]  
 Recvr\_gain = 38  
 Relaxation\_delay = 2[s]  
 Repetition\_time = 5.2768[s]  
 Temp\_get = 24[dc]



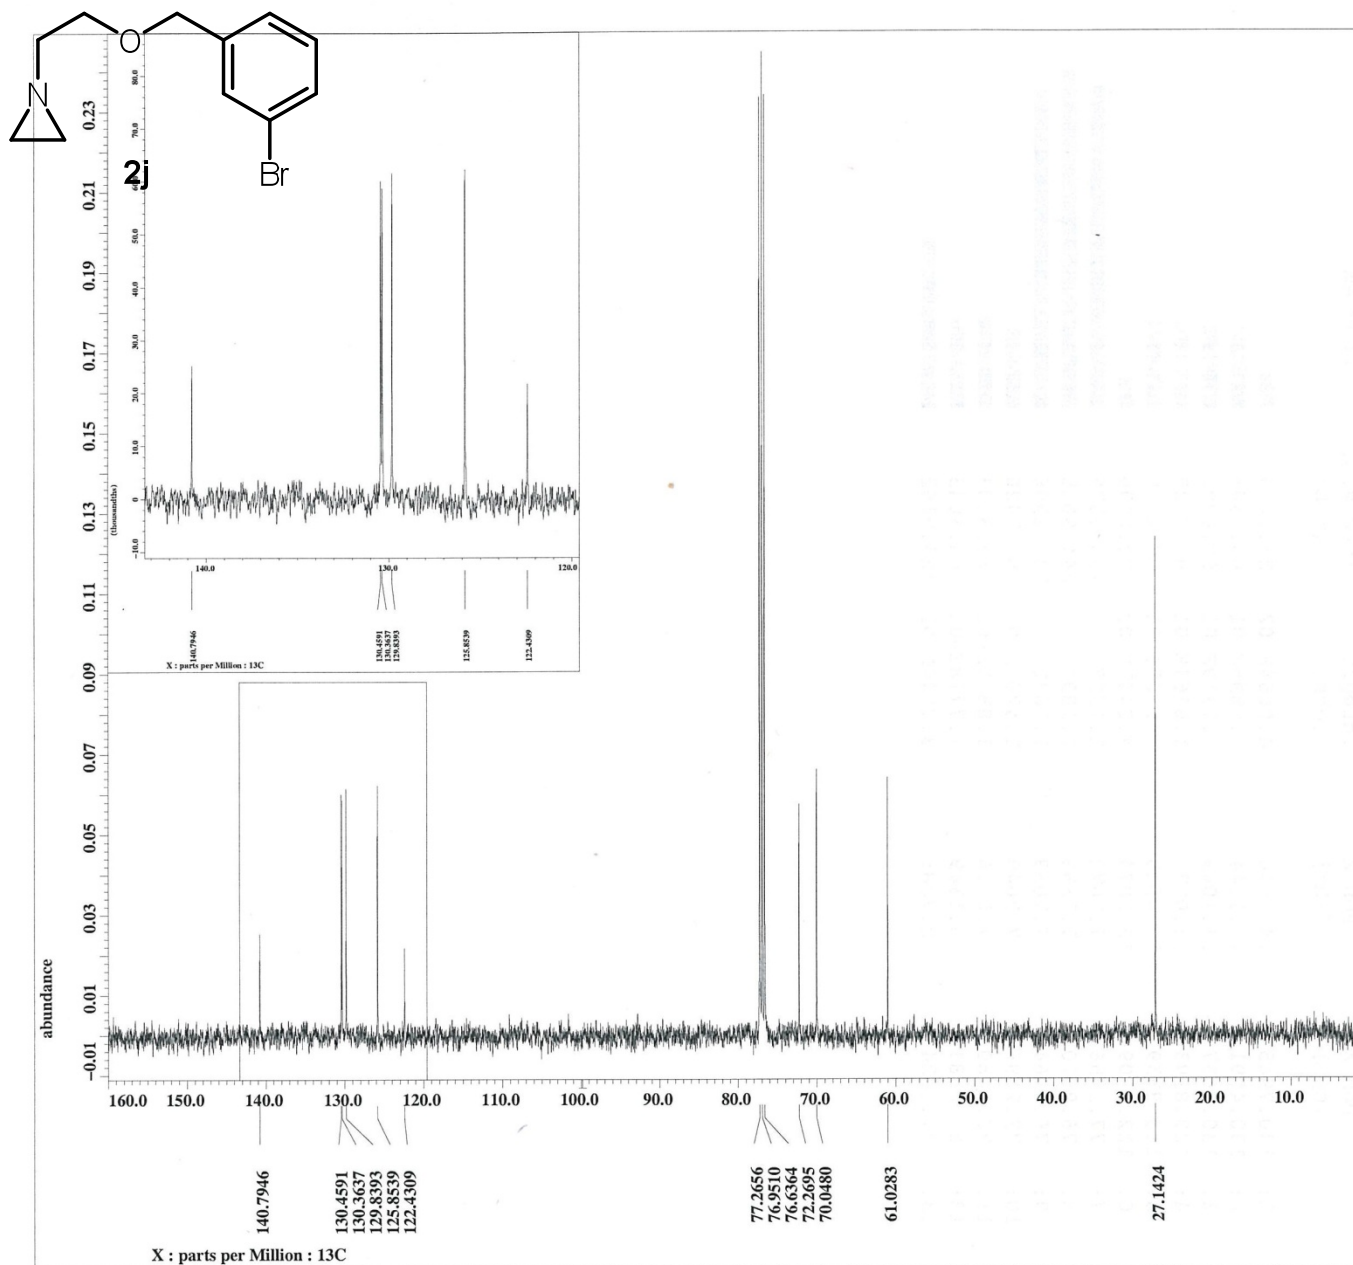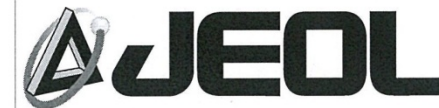

----- PROCESSING PARAMETERS -----  
 dc\_balance : 0 : FALSE  
 sexp : 2.0[Hz] : 0.0[s]  
 trapezoid3 : 0[%] : 80[%] : 100[%]  
 zerofill : 1  
 fft : 1 : TRUE : TRUE  
 machinephase  
 ppm  
 reference : 77.166[ppm] : 77[ppm]  
 Derived from: 80-1443,r.t.,13C,CDC13-1.j

Filename = 80-1443,r.t.,13C,CDC1  
 Author = delta  
 Experiment = single\_pulse\_dec  
 Sample\_id = 1  
 Solvent = CHLOROFORM-D  
 Creation\_time = 20-JAN-2012 15:41:40  
 Revision\_time = 20-JAN-2012 15:46:50  
 Current\_time = 20-JAN-2012 15:47:40

Comment = single pulse decouple  
 Data\_format = 1D COMPLEX  
 Dim\_size = 26214  
 Dim\_title = 13C  
 Dim\_units = [ppm]  
 Dimensions = X  
 Site = ECX 400P  
 Spectrometer = DELTA2\_NMR

Field\_strength = 9.389766[T] (400[MHz])  
 X\_acq\_duration = 1.0433312[s]  
 X\_domain = 13C  
 X\_freq = 100.52530333[MHz]  
 X\_offset = 100[ppm]  
 X\_points = 32768  
 X\_prescans = 2  
 X\_resolution = 0.95846665[Hz]  
 X\_sweep = 31.40703518[kHz]  
 Irr\_domain = 1H  
 Irr\_freq = 399.78219838[MHz]  
 Irr\_offset = 5[ppm]  
 Clipped = FALSE  
 Mod\_return = 1  
 Scans = 51  
 Total\_scans = 51

X\_90\_width = 8.5[us]  
 X\_acq\_time = 1.0433312[s]  
 X\_angle = 30[deg]  
 X\_atn = 3.6[dB]  
 X\_pulse = 2.8333333[us]  
 Irr\_atn\_dec = 20.356[dB]  
 Irr\_atn\_noe = 20.356[dB]  
 Irr\_noise = WALTZ  
 Decoupling = TRUE  
 Initial\_wait = 1[s]  
 Noe = TRUE  
 Noe\_time = 3[s]  
 Recvr\_gain = 46  
 Relaxation\_delay = 3[s]  
 Repetition\_time = 4.0433312[s]  
 Temp\_get = 23.8[dc]

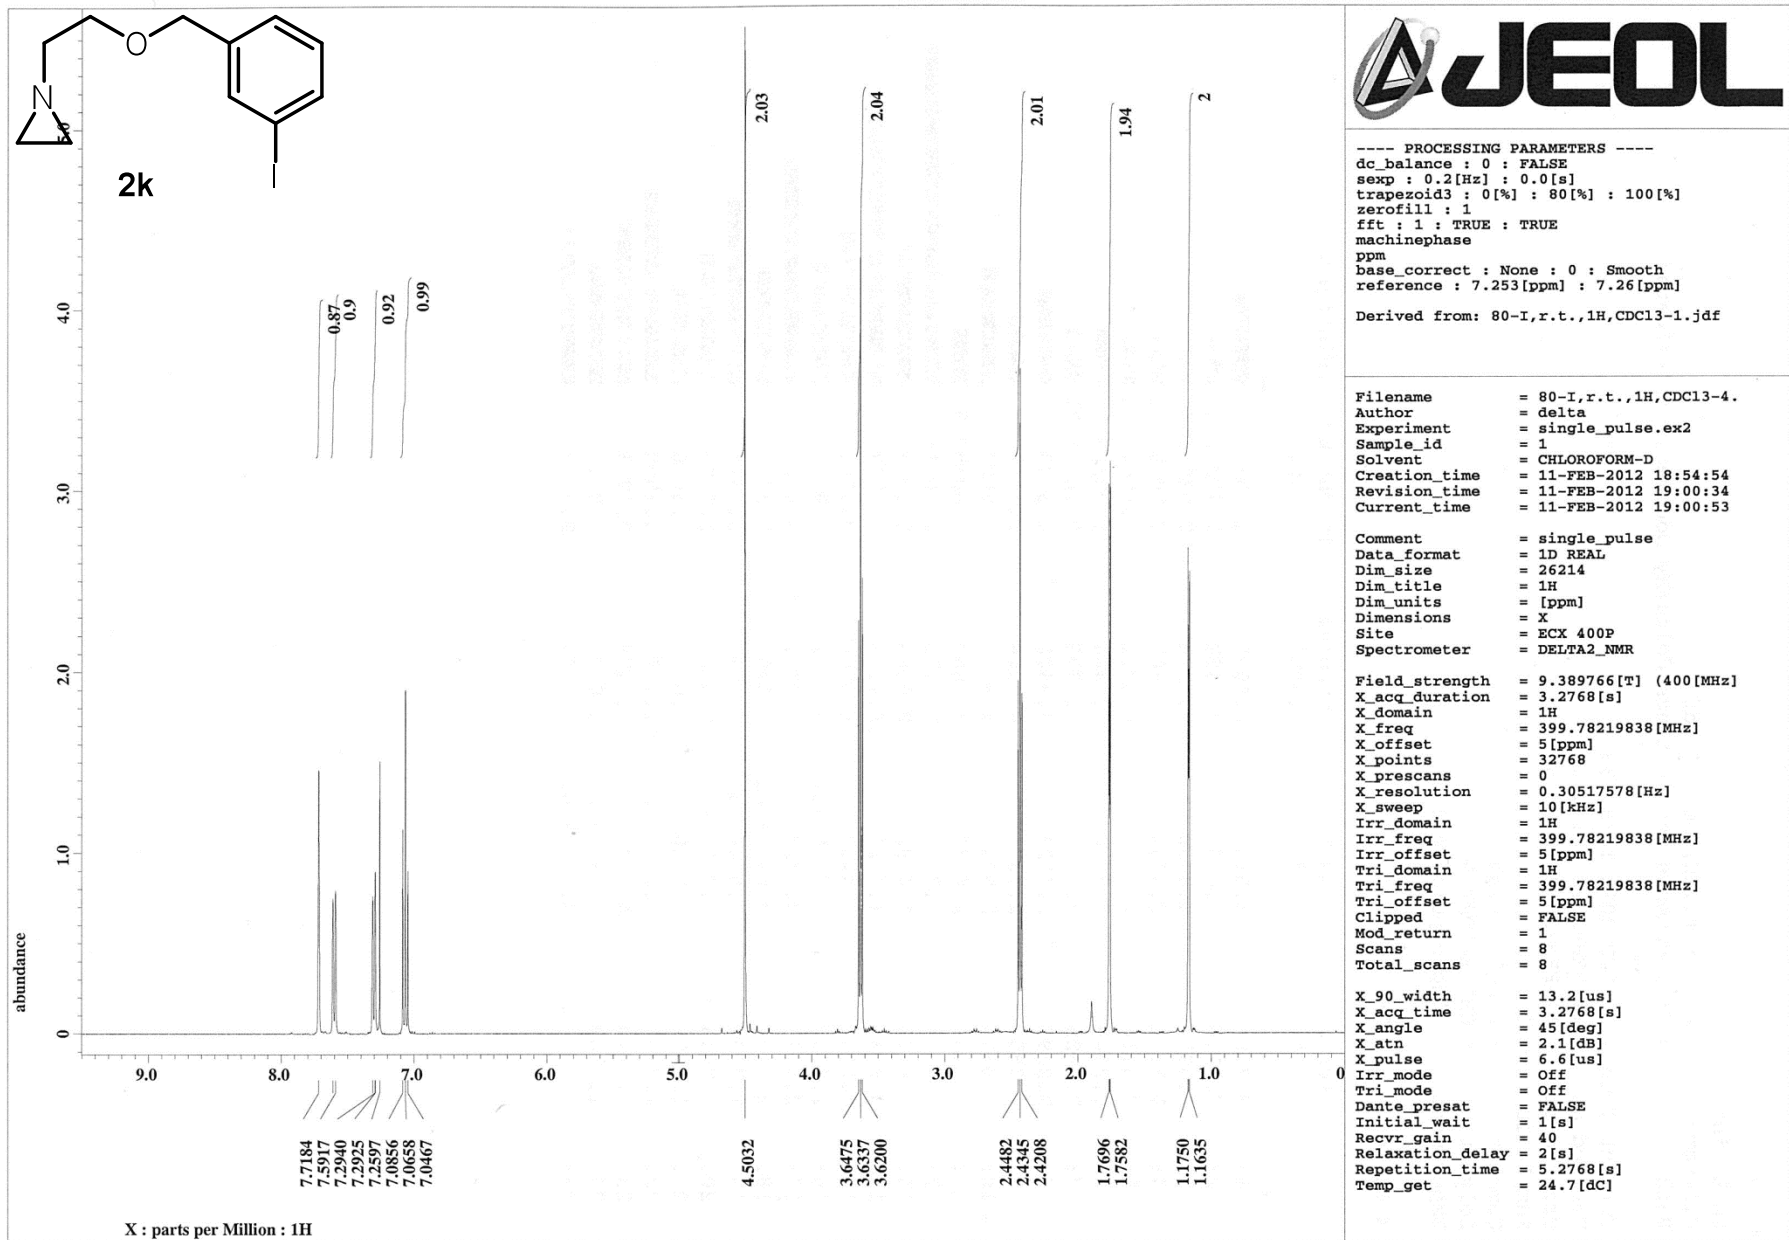

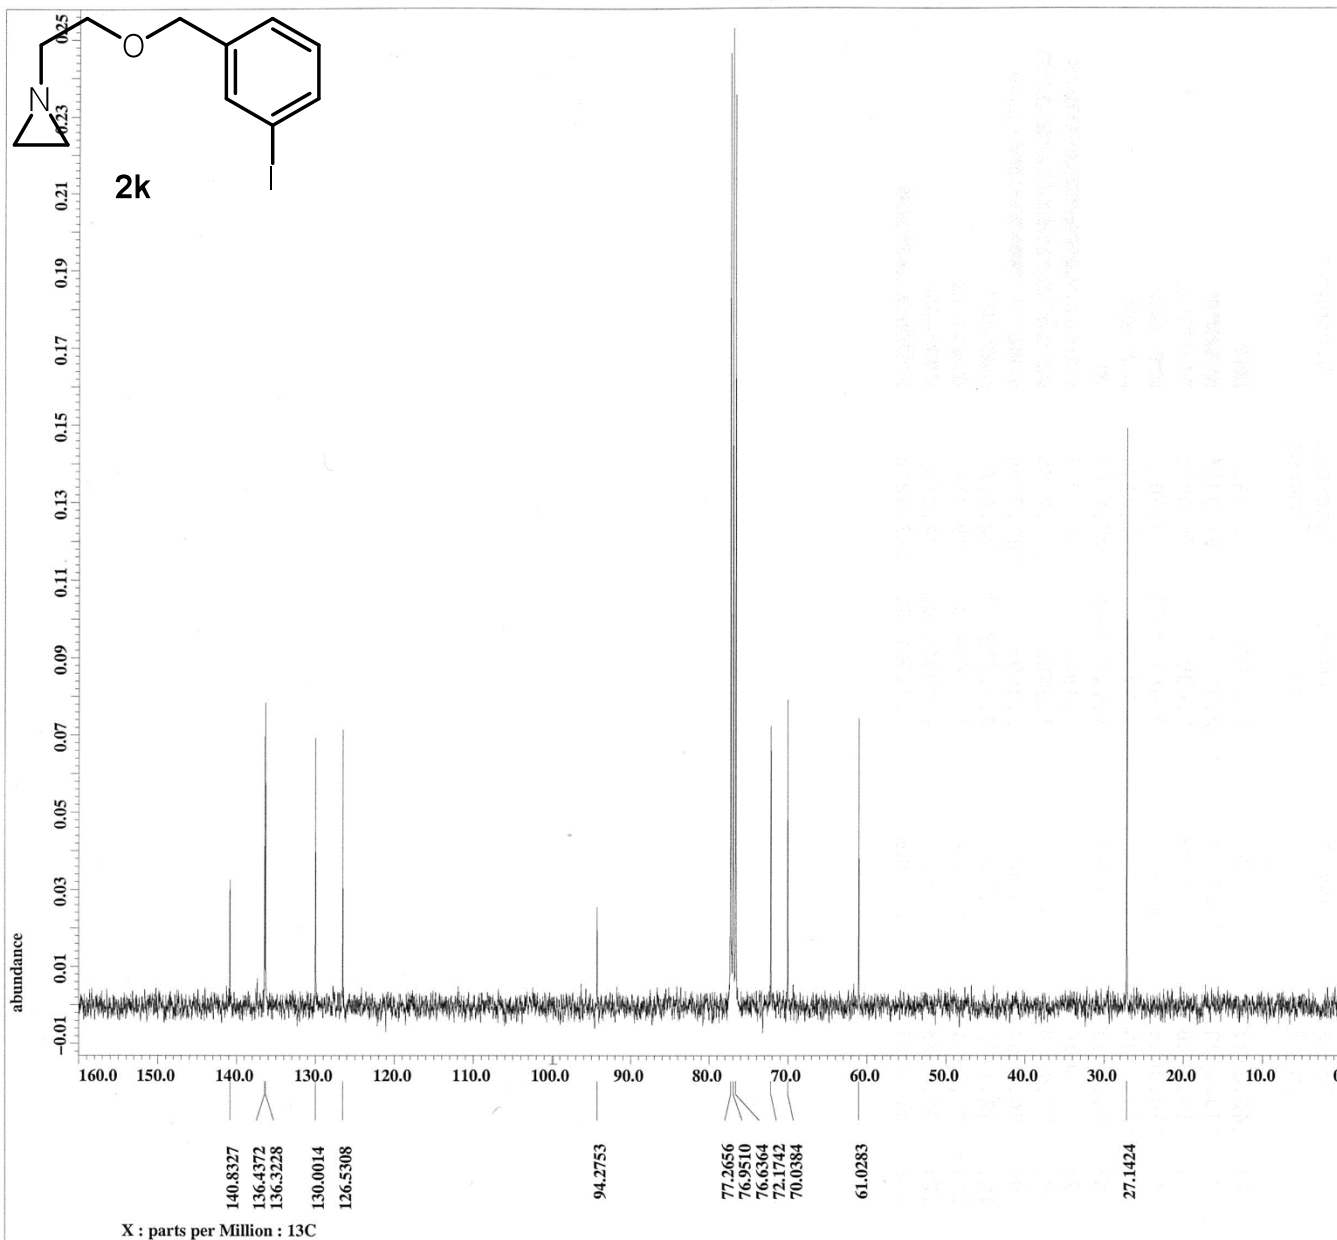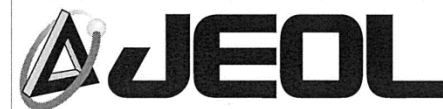

----- PROCESSING PARAMETERS -----  
dc\_balance : 0 : FALSE  
sexp : 2.0[Hz] : 0.0[s]  
trapezoid3 : 0[%] : 80[%] : 100[%]  
zerofill : 1  
fft : 1 : TRUE : TRUE  
machinephase  
ppm  
reference : 77.166[ppm] : 77[ppm]  
Derived from: 80-I-az,r.t.,13C,CDC13-1.j

Filename = 80-I-az,r.t.,13C,CDC1  
Author = delta  
Experiment = single\_pulse\_dec  
Sample\_id = 1  
Solvent = CHLOROFORM-D  
Creation\_time = 11-FEB-2012 19:24:33  
Revision\_time = 11-FEB-2012 19:28:46  
Current\_time = 11-FEB-2012 19:29:20

Comment = single pulse decouple  
Data\_format = 1D COMPLEX  
Dim\_size = 26214  
Dim\_title = 13C  
Dim\_units = [ppm]  
Dimensions = X  
Site = ECX 400P  
Spectrometer = DELTA2\_NMR

Field\_strength = 9.389766[T] (400[MHz])  
X\_acq\_duration = 1.04333312[s]  
X\_domain = 13C  
X\_freq = 100.52530333[MHz]  
X\_offset = 100[ppm]  
X\_points = 32768  
X\_prescans = 2  
X\_resolution = 0.95846665[Hz]  
X\_sweep = 31.40703518[kHz]  
Irr\_domain = 1H  
Irr\_freq = 399.78219838[MHz]  
Irr\_offset = 5[ppm]  
Clipped = FALSE  
Mod\_return = 1  
Scans = 68  
Total\_scans = 68

X\_90\_width = 8.5[us]  
X\_acq\_time = 1.04333312[s]  
X\_angle = 30[deg]  
X\_atn = 3.6[dB]  
X\_pulse = 2.83333333[us]  
Irr\_atn\_dec = 20.356[dB]  
Irr\_atn\_noe = 20.356[dB]  
Irr\_noise = WALTZ  
Decoupling = TRUE  
Initial\_wait = 1[s]  
Noe = TRUE  
Noe\_time = 3[s]  
Recvr\_gain = 48  
Relaxation\_delay = 3[s]  
Repetition\_time = 4.04333312[s]  
Temp\_get = 25[dc]

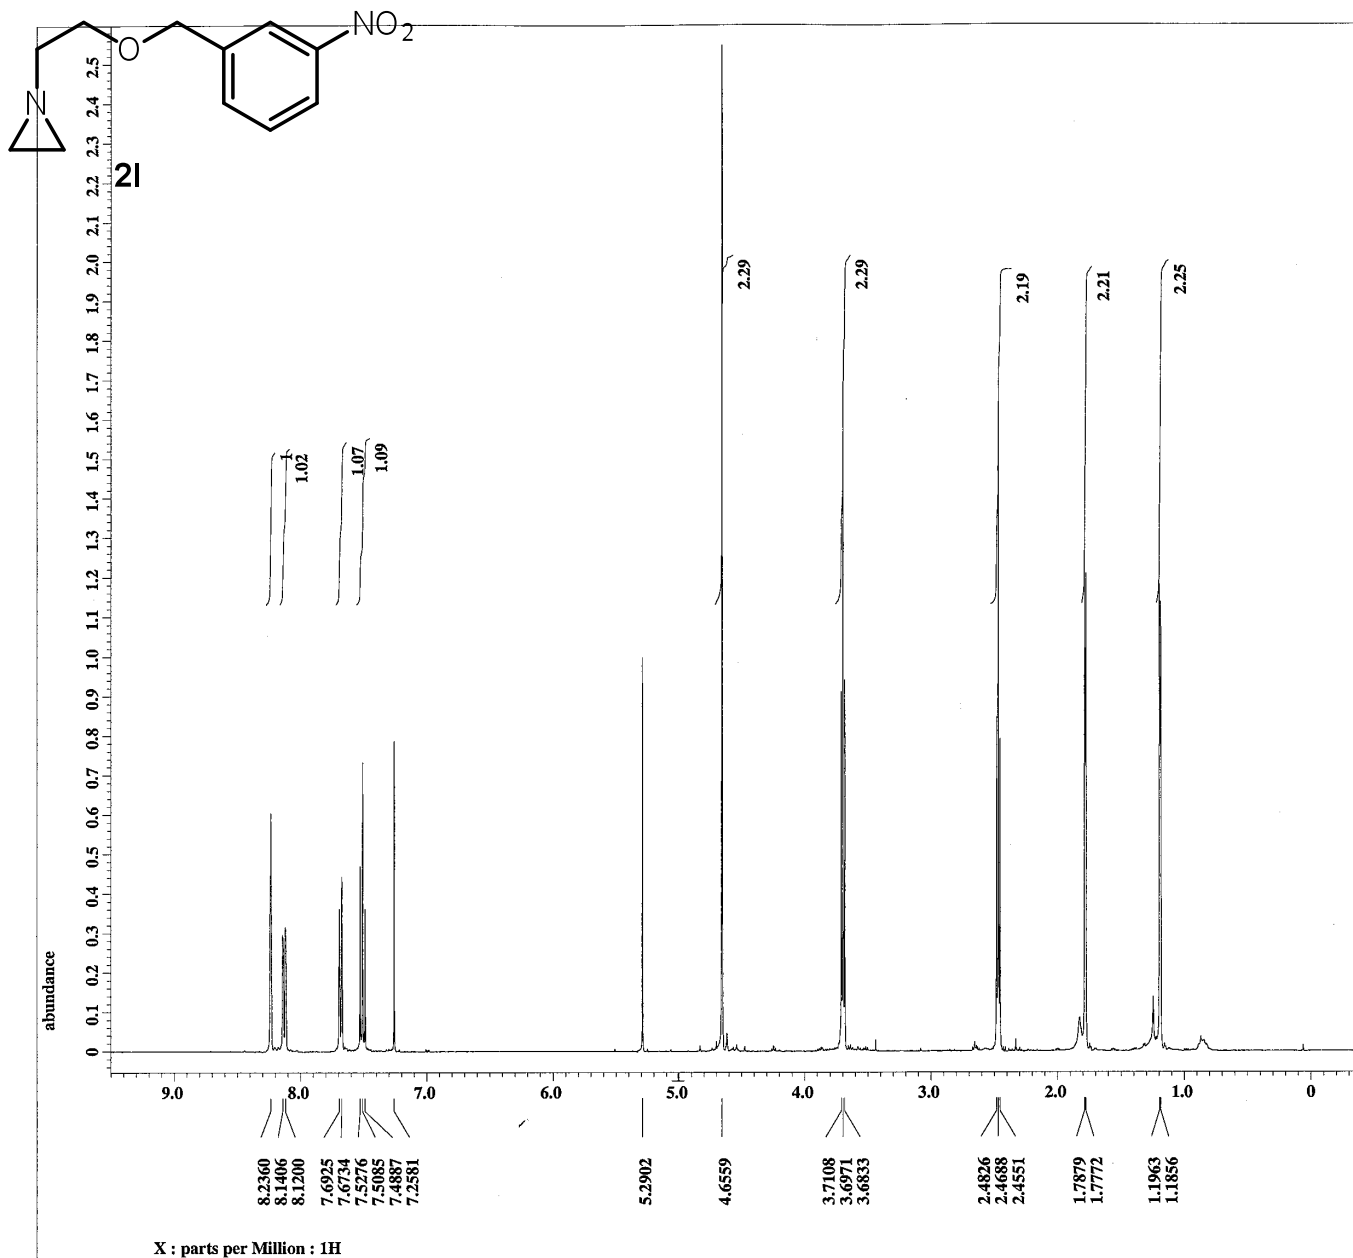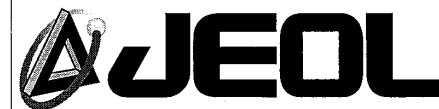

----- PROCESSING PARAMETERS -----  
 dc\_balance : 0 : FALSE  
 secp : 0.2[Hz] : 0.0[s]  
 trapezoid3 : 0[%] : 80[%] : 100[%]  
 zerofill : 1  
 fft : 1 : TRUE : TRUE  
 machinephase  
 ppm  
 base\_correct : None : 0 : Smooth  
 reference : 7.253[ppm] : 7.26[ppm]  
 Derived from: 80-1411-und,r.t.,1H,CDCl3-

Filename = 80-1411-und,r.t.,1H,C  
 Author = delta  
 Experiment = single\_pulse.ex2  
 Sample\_id = 1  
 Solvent = CHLOROFORM-D  
 Creation\_time = 9-DEC-2011 12:29:35  
 Revision\_time = 9-DEC-2011 12:31:34  
 Current\_time = 9-DEC-2011 12:31:36

Comment = single\_pulse  
 Data\_format = 1D REAL  
 Dim\_size = 26214  
 Dim\_title = 1H  
 Dim\_units = [ppm]  
 Dimensions = X  
 Site = ECX 400P  
 Spectrometer = DELTA2\_NMR

Field\_strength = 9.389766[T] (400[MHz])  
 X\_acq\_duration = 3.2768[s]  
 X\_domain = 1H  
 X\_freq = 399.78219838[MHz]  
 X\_offset = 5[ppm]  
 X\_points = 32768  
 X\_prescans = 0  
 X\_resolution = 0.30517578[Hz]  
 X\_sweep = 10[kHz]  
 Irr\_domain = 1H  
 Irr\_freq = 399.78219838[MHz]  
 Irr\_offset = 5[ppm]  
 Tri\_domain = 1H  
 Tri\_freq = 399.78219838[MHz]  
 Tri\_offset = 5[ppm]  
 Clipped = FALSE  
 Mod\_return = 1  
 Scans = 8  
 Total\_scans = 8

X\_90\_width = 14[us]  
 X\_acq\_time = 3.2768[s]  
 X\_angle = 45[deg]  
 X\_atn = 2.1[dB]  
 X\_pulse = 7[us]  
 Irr\_mode = Off  
 Tri\_mode = Off  
 Dante\_preset = FALSE  
 Initial\_wait = 1[s]  
 Recvr\_gain = 38  
 Relaxation\_delay = 2[s]  
 Repetition\_time = 5.2768[s]  
 Temp\_get = 403.4[°C]

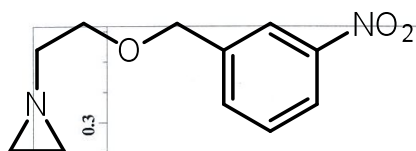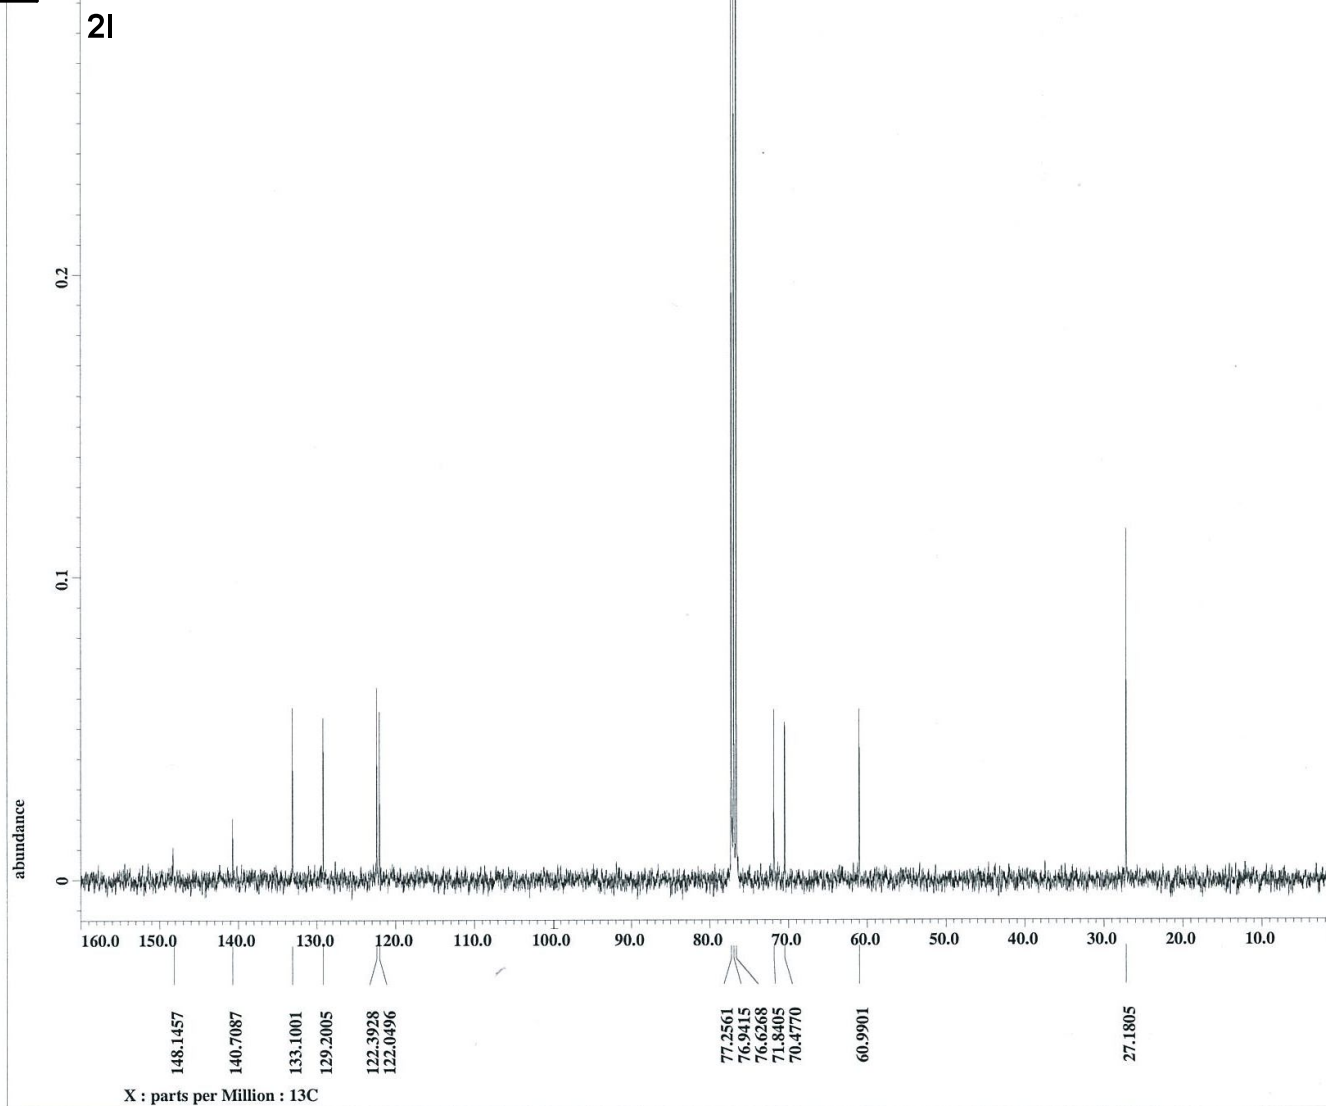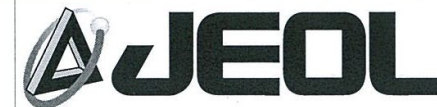

---- PROCESSING PARAMETERS ----  
dc\_balance : 0 : FALSE  
sexp : 2.0[Hz] : 0.0[s]  
trapezoid3 : 0[%] : 80[%] : 100[%]  
zerofill : 1  
fft : 1 : TRUE : TRUE  
machinephase  
ppm  
reference : 77.166[ppm] : 77[ppm]  
Derived from: 80-1411,r.t.,13C,CDCl3-1.j

Filename = 80-1411,r.t.,13C,CDCl  
Author = delta  
Experiment = single\_pulse\_dec  
Sample\_id = 1  
Solvent = CHLOROFORM-D  
Creation\_time = 9-DEC-2011 13:17:56  
Revision\_time = 9-DEC-2011 13:17:17  
Current\_time = 9-DEC-2011 13:17:46

Comment = single pulse decouple  
Data\_format = 1D COMPLEX  
Dim\_size = 26214  
Dim\_title = 13C  
Dim\_units = [ppm]  
Dimensions = X  
Site = ECX 400P  
Spectrometer = DELTA2\_NMR

Field\_strength = 9.389766[T] (400[MHz])  
X\_acq\_duration = 1.04333312[s]  
X\_domain = 13C  
X\_freq = 100.52530333[MHz]  
X\_offset = 100[ppm]  
X\_points = 32768  
X\_prescans = 2  
X\_resolution = 0.95846665[Hz]  
X\_sweep = 31.40703518[kHz]  
Irr\_domain = 1H  
Irr\_freq = 399.78219838[MHz]  
Irr\_offset = 5[ppm]  
Clipped = FALSE  
Mod\_return = 1  
Scans = 101  
Total\_scans = 101

X\_90\_width = 11.8[us]  
X\_acq\_time = 1.04333312[s]  
X\_angle = 30[deg]  
X\_atn = 6[dB]  
X\_pulse = 3.93333333[us]  
Irr\_atn\_dec = 21.035[dB]  
Irr\_atn\_noe = 21.035[dB]  
Irr\_noise = WALTZ  
Decoupling = TRUE  
Initial\_wait = 1[s]  
Noe = TRUE  
Noe\_time = 3[s]  
Recvr\_gain = 50  
Relaxation\_delay = 3[s]  
Repetition\_time = 4.04333312[s]  
Temp\_get = 403.4[dC]

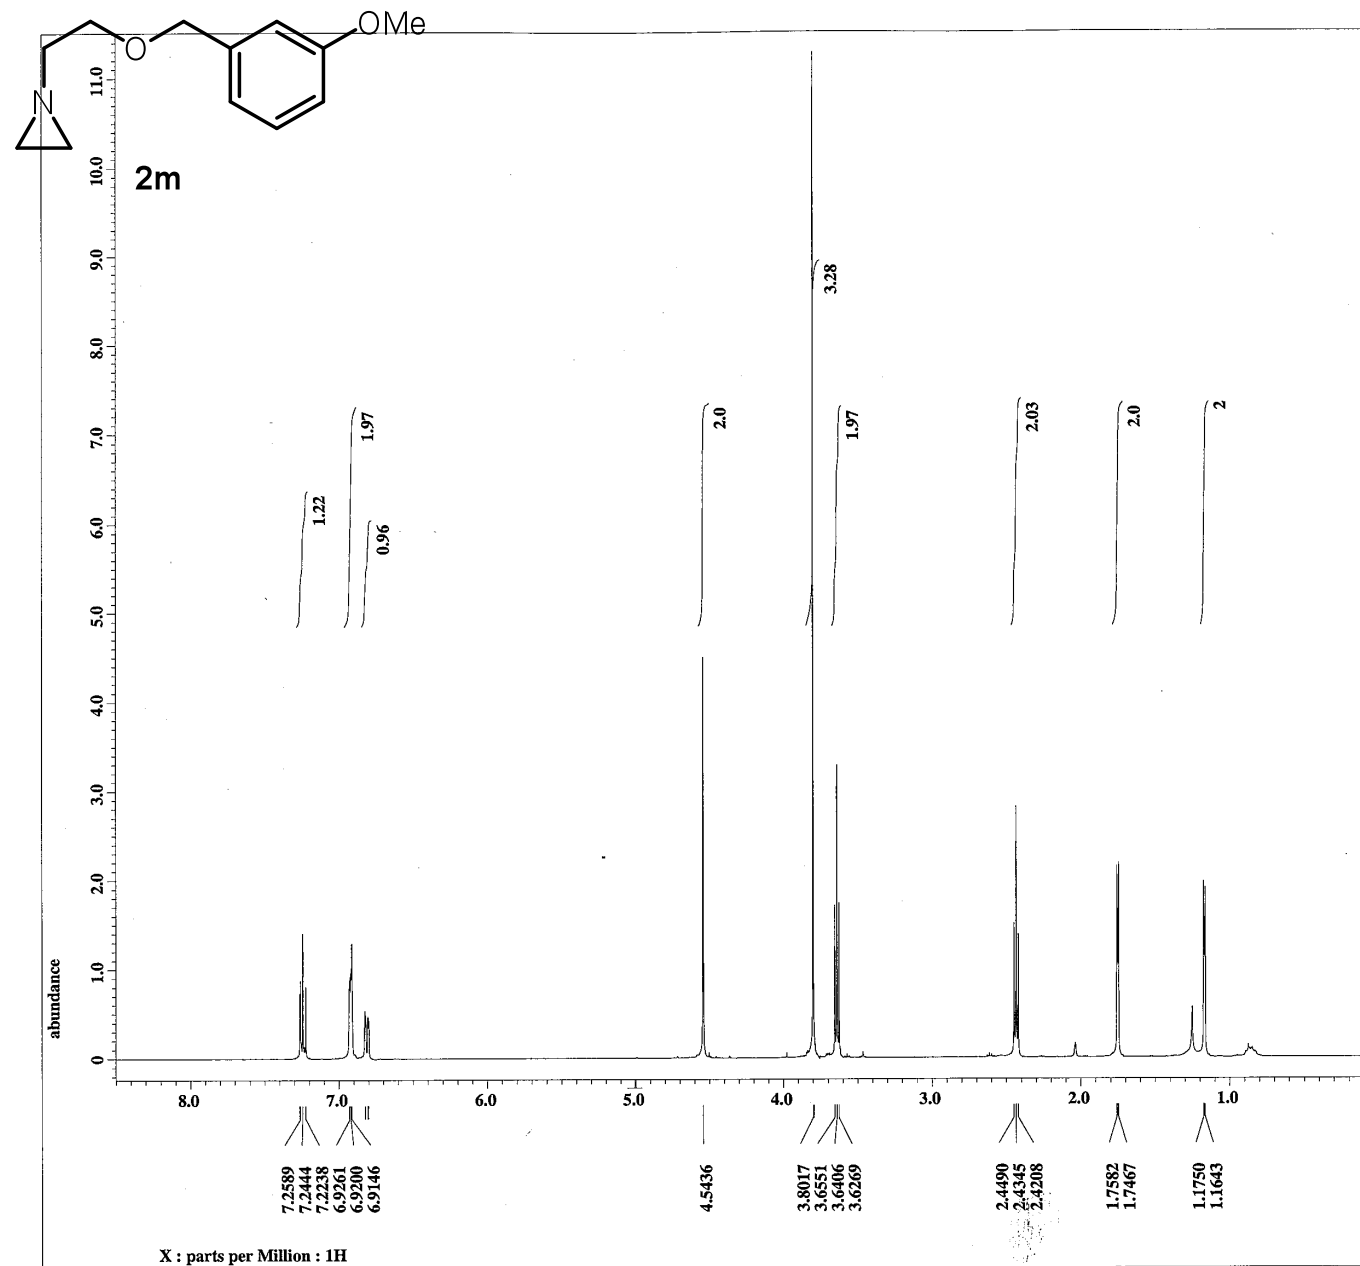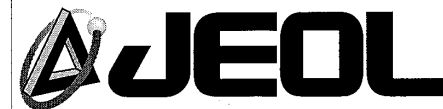

----- PROCESSING PARAMETERS -----  
 dc\_balance : 0 : FALSE  
 secp : 0.2[Hz] : 0.0[s]  
 trapezoid3 : 0[%] : 80[%] : 100[%]  
 zerofill : 1  
 fft : 1 : TRUE : TRUE  
 machinephase  
 ppm  
 base\_correct : None : 0 : Smooth  
 reference : 7.253[ppm] : 7.26[ppm]  
 Derived from: 80-1451,r.t.,1H,CDC13-1.jd

Filename = 80-1451,r.t.,1H,CDC13  
 Author = delta  
 Experiment = single\_pulse.ex2  
 Sample\_id = 1  
 Solvent = CHLOROFORM-D  
 Creation\_time = 3-FEB-2012 10:31:09  
 Revision\_time = 3-FEB-2012 10:37:08  
 Current\_time = 3-FEB-2012 10:37:35

Comment = single\_pulse  
 Data\_format = 1D REAL  
 Dim\_size = 26214  
 Dim\_title = 1H  
 Dim\_units = [ppm]  
 Dimensions = X  
 Site = ECX 400P  
 Spectrometer = DELTA2\_NMR

Field\_strength = 9.389766[T] (400[MHz])  
 X\_acq\_duration = 3.2768[s]  
 X\_domain = 1H  
 X\_freq = 399.78219838[MHz]  
 X\_offset = 5[ppm]  
 X\_points = 32768  
 X\_prescans = 0  
 X\_resolution = 0.30517578[Hz]  
 X\_sweep = 10[kHz]  
 Irr\_domain = 1H  
 Irr\_freq = 399.78219838[MHz]  
 Irr\_offset = 5[ppm]  
 Tri\_domain = 1H  
 Tri\_freq = 399.78219838[MHz]  
 Tri\_offset = 5[ppm]  
 Clipped = FALSE  
 Mod\_return = 1  
 Scans = 8  
 Total\_scans = 8

X\_90\_width = 13.2[us]  
 X\_acq\_time = 3.2768[s]  
 X\_angle = 45[deg]  
 X\_atn = 2.1[db]  
 X\_pulse = 6.6[us]  
 Irr\_mode = Off  
 Tri\_mode = Off  
 Dante\_presat = FALSE  
 Initial\_wait = 1[s]  
 Recvr\_gain = 36  
 Relaxation\_delay = 2[s]  
 Repetition\_time = 5.2768[s]  
 Temp\_get = 24.6[dc]

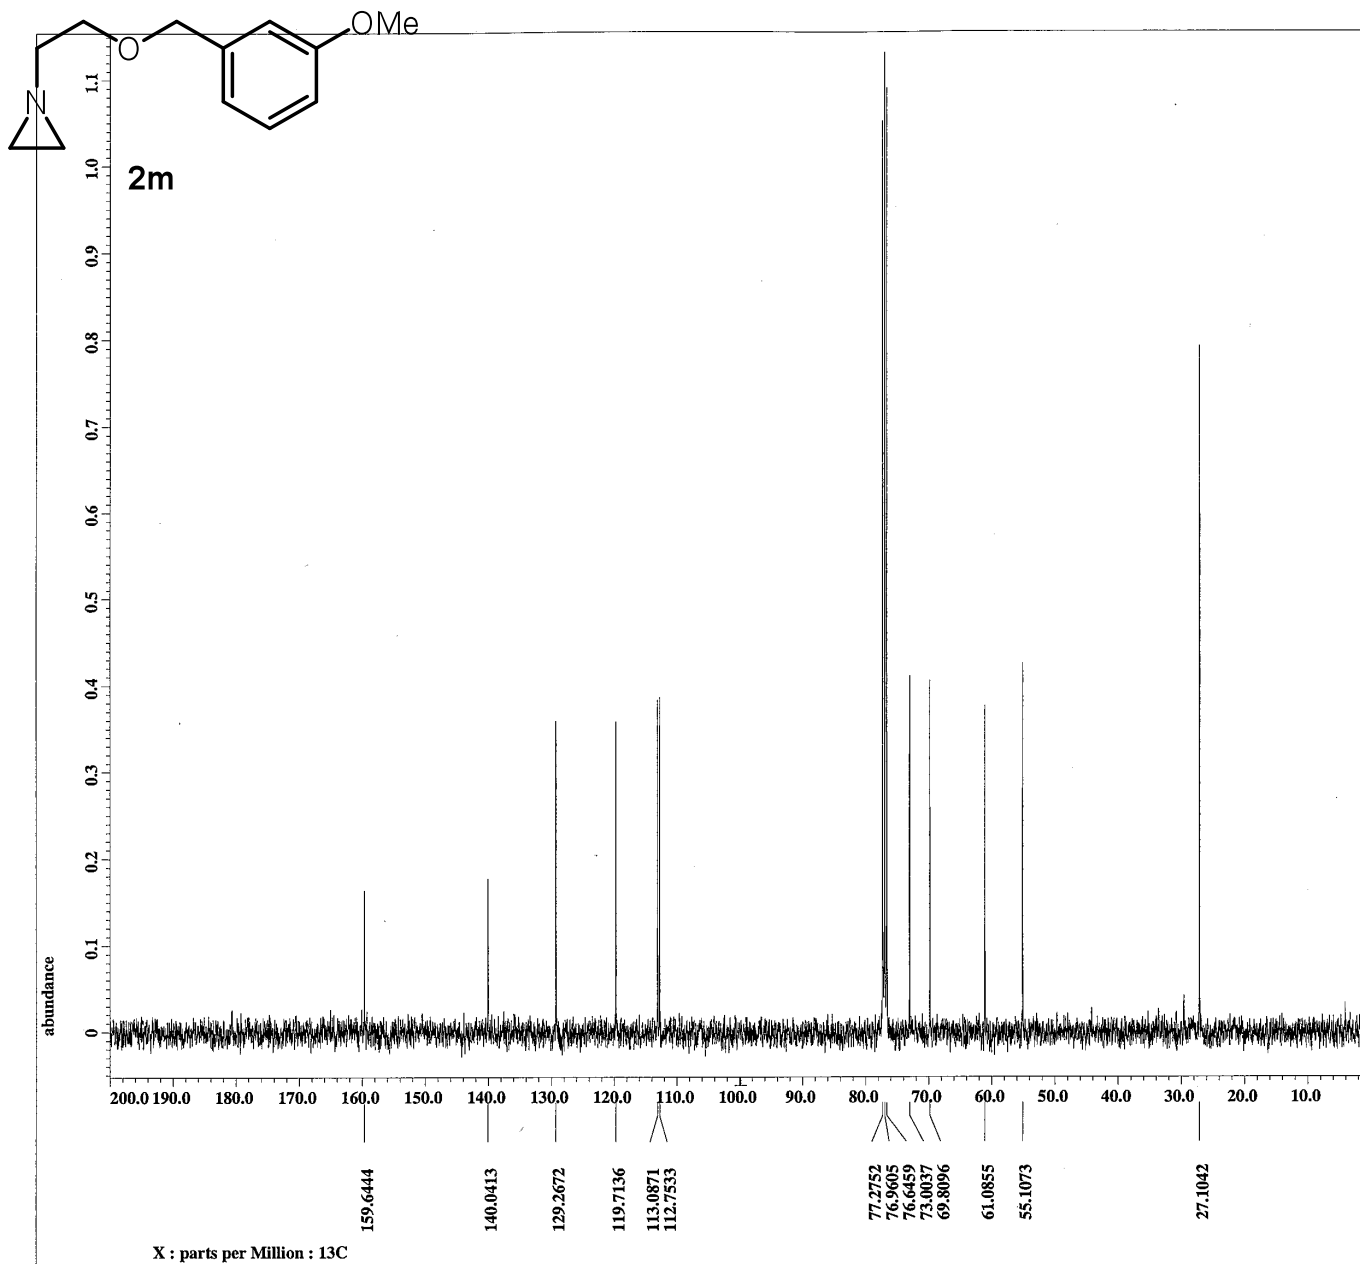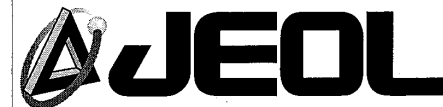

----- PROCESSING PARAMETERS -----  
dc\_balance : 0 : FALSE  
sexp : 2.0[Hz] : 0.0[s]  
trapezoid3 : 0[%] : 80[%] : 100[%]  
zerofill : 1  
fft : 1 : TRUE : TRUE  
machinphase  
ppm  
reference : 77.166[ppm] : 77[ppm]  
Derived from: 80-1451,r.t.,13C,CDC13-1.j

Filename = 80-1451,r.t.,13C,CDC1  
Author = delta  
Experiment = single\_pulse\_dec  
Sample\_id = 1  
Solvent = CHLOROFORM-D  
Creation\_time = 3-FEB-2012 10:38:35  
Revision\_time = 3-FEB-2012 10:43:21  
Current\_time = 3-FEB-2012 10:44:27

Comment = single pulse decouple  
Data\_format = 1D COMPLEX  
Dim\_size = 26214  
Dim\_title = 13C  
Dim\_units = [ppm]  
Dimensions = X  
Site = ECX 400P  
Spectrometer = DELTA2\_NMR

Field\_strength = 9.389766[T] (400[MHz])  
X\_acq\_duration = 1.0433312[s]  
X\_domain = 13C  
X\_freq = 100.52530333[MHz]  
X\_offset = 100[ppm]  
X\_points = 32768  
X\_prescans = 2  
X\_resolution = 0.95846665[Hz]  
X\_sweep = 31.40703518[kHz]  
Irr\_domain = 1H  
Irr\_freq = 399.78219838[MHz]  
Irr\_offset = 5[ppm]  
Clipped = TRUE  
Mod\_return = 1  
Scans = 51  
Total\_scans = 51

X\_90\_width = 8.5[us]  
X\_acq\_time = 1.0433312[s]  
X\_angle = 30[deg]  
X\_atn = 3.6[dB]  
X\_pulse = 2.83333333[us]  
Irr\_atn\_dec = 20.356[dB]  
Irr\_atn\_noe = 20.356[dB]  
Irr\_noise = WALTZ  
Decoupling = TRUE  
Initial\_wait = 1[s]  
Noe = TRUE  
Noe\_time = 3[s]  
Recvr\_gain = 60  
Relaxation\_delay = 3[s]  
Repetition\_time = 4.0433312[s]  
Temp\_get = 24.8[dc]

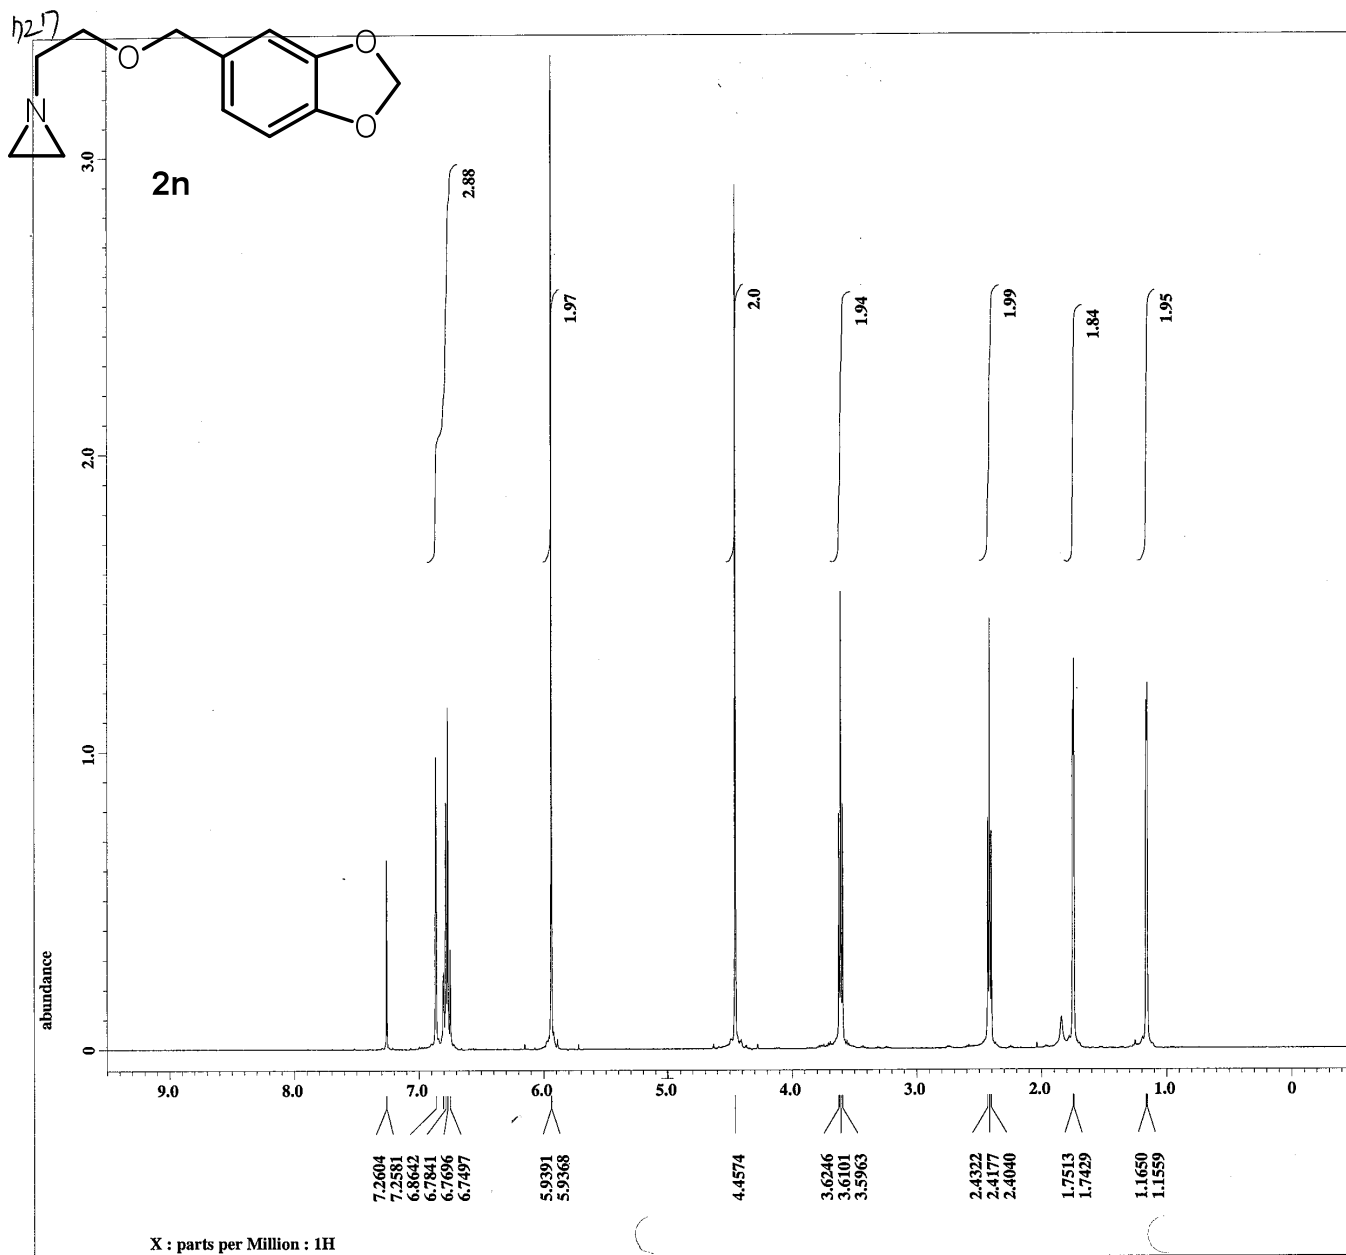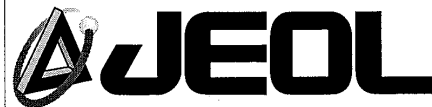

---- PROCESSING PARAMETERS ----  
dc\_balance : 0 : FALSE  
sexp : 0.2[Hz] : 0.0[s]  
trapezoid3 : 0[%] : 80[%] : 100[%]  
zerofill : 1  
fft : 1 : TRUE : TRUE  
machinephase  
ppm  
base\_correct : None : 0 : Smooth  
reference : 7.253[ppm] : 7.26[ppm]  
Derived from: 80-1381,r.t.,1H,CDC13-1.Jd

Filename = 80-1381,r.t.,1H,CDC13  
Author = delta  
Experiment = single\_pulse.ex2  
Sample\_id = 1  
Solvent = CHLOROFORM-D  
Creation\_time = 15-NOV-2011 15:24:35  
Revision\_time = 15-NOV-2011 15:25:30  
Current\_time = 15-NOV-2011 15:25:42

Comment = single\_pulse  
Data\_format = 1D REAL  
Dim\_size = 26214  
Dim\_title = 1H  
Dim\_units = [ppm]  
Dimensions = X  
Site = ECX 400P  
Spectrometer = DELTA2\_NMR

Field\_strength = 9.389766[T] (400[MHz])  
X\_acq\_duration = 3.2768[s]  
X\_domain = 1H  
X\_freq = 399.78219838[MHz]  
X\_offset = 5[ppm]  
X\_points = 32768  
X\_prescans = 0  
X\_resolution = 0.30517578[Hz]  
X\_sweep = 10[kHz]  
Irr\_domain = 1H  
Irr\_freq = 399.78219838[MHz]  
Irr\_offset = 5[ppm]  
Tri\_domain = 1H  
Tri\_freq = 399.78219838[MHz]  
Tri\_offset = 5[ppm]  
Clipped = FALSE  
Mod\_return = 1  
Scans = 8  
Total\_scans = 8  
X\_90\_width = 13.2[us]  
X\_acq\_time = 3.2768[s]  
X\_angle = 45[deg]  
X\_atn = 2.1[dB]  
X\_pulse = 6.6[us]  
Irr\_mode = Off  
Tri\_mode = Off  
Dante\_preset = FALSE  
Initial\_wait = 1[s]  
Recvr\_gain = 40  
Relaxation\_delay = 2[s]  
Repetition\_time = 5.2768[s]  
Temp\_get = 25.8[degC]



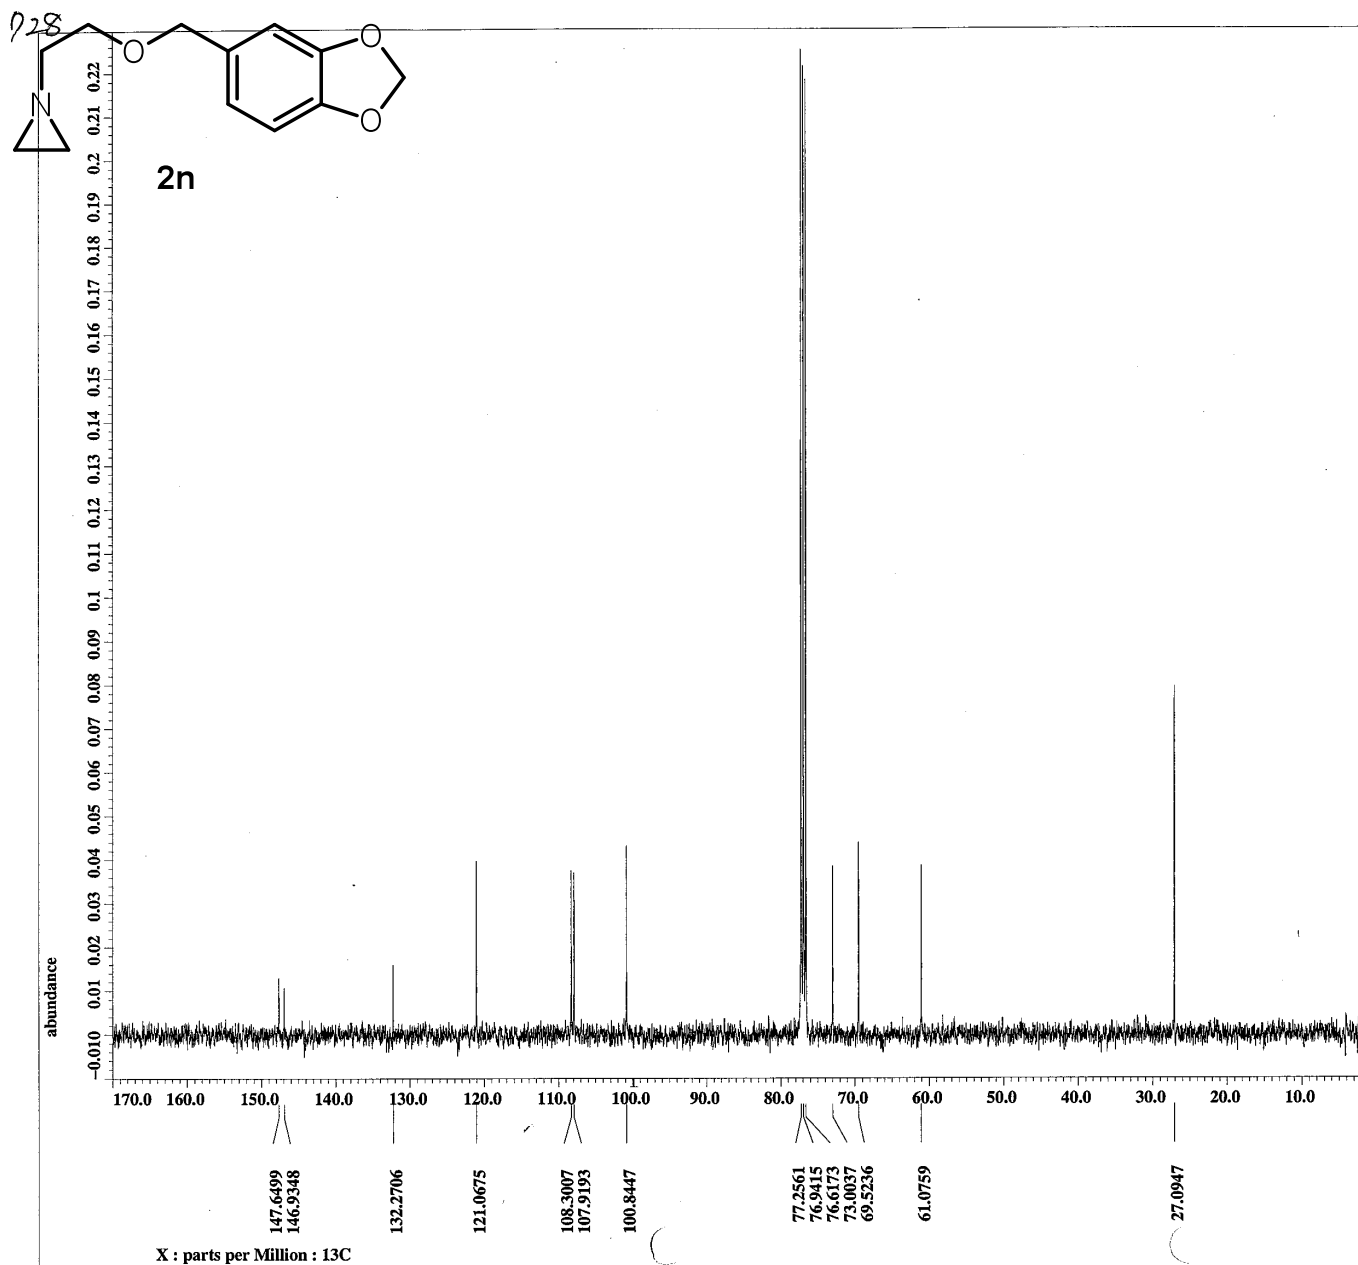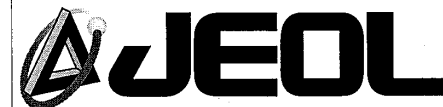

----- PROCESSING PARAMETERS -----  
dc\_balance : 0 : FALSE  
sexp : 2.0[Hz] : 0.0[s]  
trapezoid3 : 0[%] : 80[%] : 100[%]  
zerofill : 1  
fft : 1 : TRUE : TRUE  
machinephase  
ppm  
reference : 77.166[ppm] : 77[ppm]  
Derived from: 80-1381,r.t.,13C,CDC13-1.j

Filename = 80-1381,r.t.,13C,CDC1  
Author = delta  
Experiment = single\_pulse\_dec  
Sample\_id = 1  
Solvent = CHLOROFORM-D  
Creation\_time = 15-NOV-2011 15:35:55  
Revision\_time = 15-NOV-2011 15:35:27  
Current\_time = 15-NOV-2011 15:36:07

Comment = single pulse decouple  
Data\_format = 1D COMPLEX  
Dim\_size = 26214  
Dim\_title = 13C  
Dim\_units = [ppm]  
Dimensions = X  
Site = ECK 400P  
Spectrometer = DELTA2\_NMR

Field\_strength = 9.389766[T] (400[MHz])  
X\_acq\_duration = 1.04333312[s]  
X\_domain = 13C  
X\_freq = 100.52530333[MHz]  
X\_offset = 100[ppm]  
X\_points = 32768  
X\_prescans = 2  
X\_resolution = 0.95846665[Hz]  
X\_sweep = 31.40703518[kHz]  
Irr\_domain = 1H  
Irr\_freq = 399.78219838[MHz]  
Irr\_offset = 5[ppm]  
Clipped = FALSE  
Mod\_return = 1  
Scans = 102  
Total\_scans = 102

X\_90\_width = 8.5[us]  
X\_acq\_time = 1.04333312[s]  
X\_angle = 30[deg]  
X\_atn = 3.6[db]  
X\_pulse = 2.83333333[us]  
Irr\_atn\_dec = 20.356[db]  
Irr\_atn\_noe = 20.356[db]  
Irr\_noise = WALTZ  
Decoupling = TRUE  
Initial\_wait = 1[s]  
Noe = TRUE  
Noe\_time = 3[s]  
Recvr\_gain = 48  
Relaxation\_delay = 3[s]  
Repetition\_time = 4.04333312[s]  
Temp\_get = 26[dc]

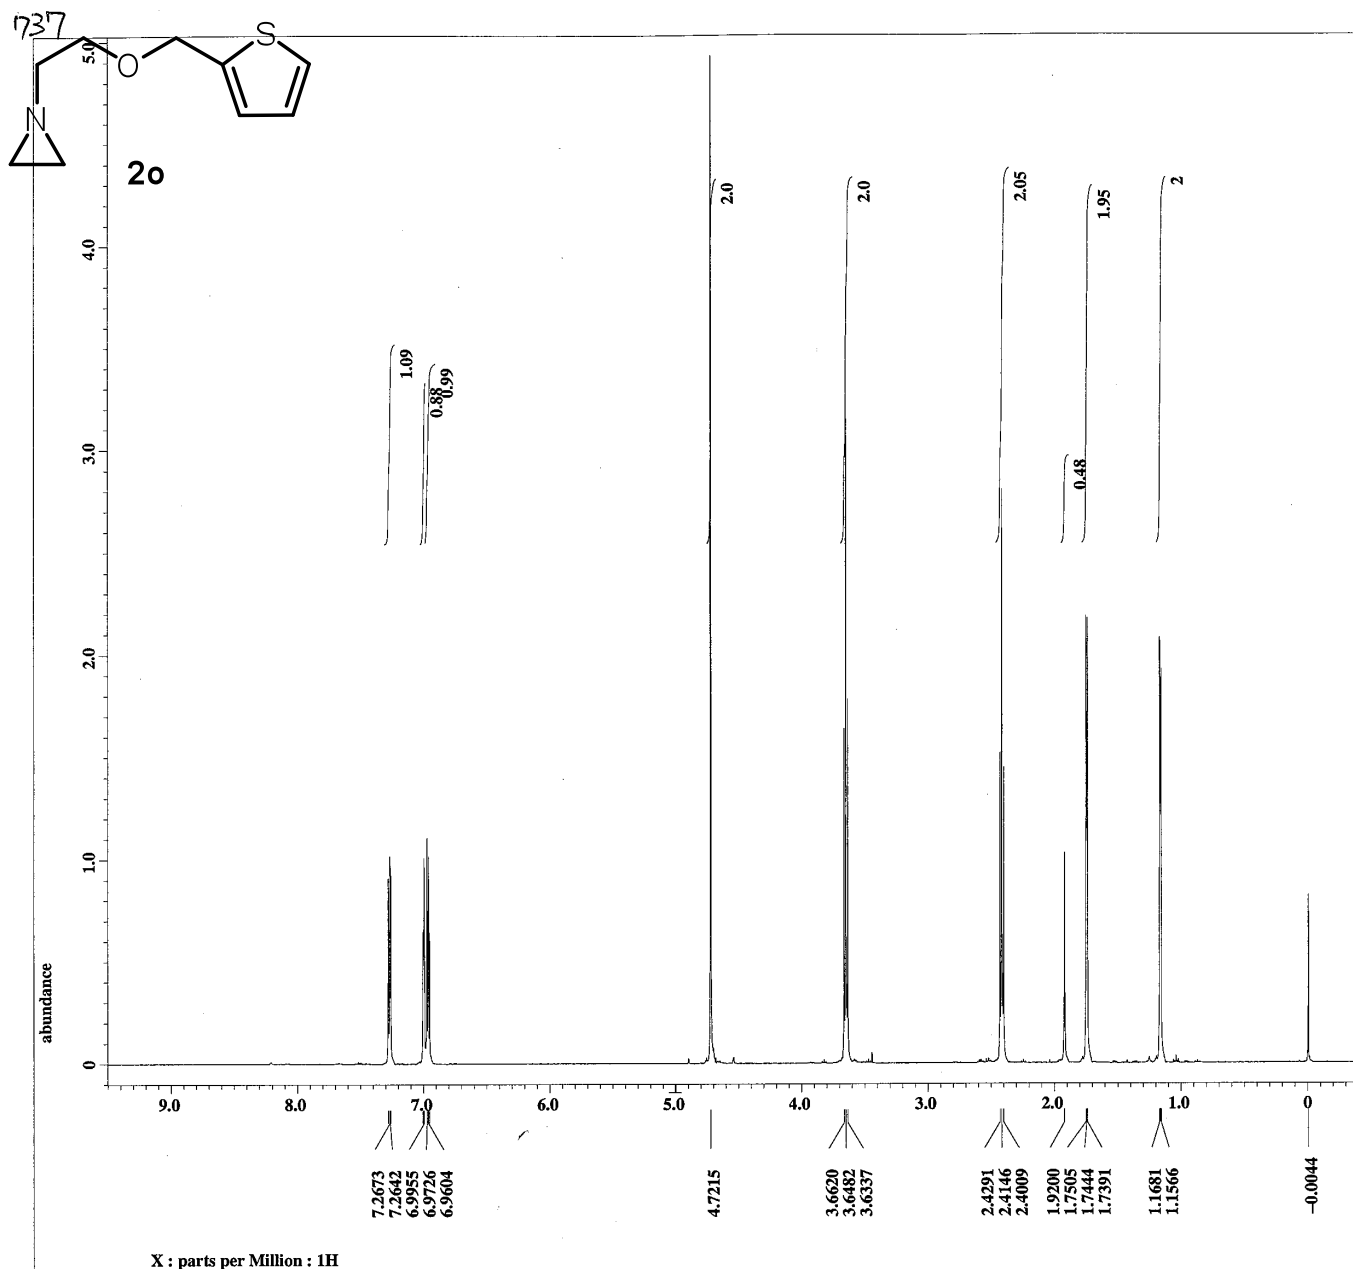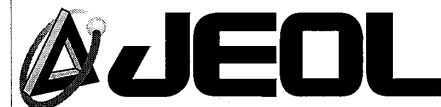

----- PROCESSING PARAMETERS -----  
 dc\_balance : 0 : FALSE  
 sexp : 0.2 [Hz] : 0.0 [s]  
 trapezoid3 : 0 [%] : 80 [%] : 100 [%]  
 zerofill : 1  
 fft : 1 : TRUE : TRUE  
 machinephase  
 ppm  
 base\_correct : None : 0 : Smooth  
 reference : 7.253 [ppm] : 7.26 [ppm]  
 Derived from: 80-1405,r.t.,1H,CDCL3-1.jd

Filename = 80-1405,r.t.,1H,CDCL3  
 Author = delta  
 Experiment = single\_pulse.ex2  
 Sample\_id = 1  
 Solvent = CHLOROFORM-D  
 Creation\_time = 2-DEC-2011 10:38:36  
 Revision\_time = 2-DEC-2011 10:40:57  
 Current\_time = 2-DEC-2011 10:41:10

Comment = single\_pulse  
 Data\_format = 1D\_REAL  
 Dim\_size = 26214  
 Dim\_title = 1H  
 Dim\_units = [ppm]  
 Dimensions = X  
 Site = ECX 400P  
 Spectrometer = DELTA2\_NMR

Field\_strength = 9.389766 [T] (400 [MHz])  
 X\_acq\_duration = 3.2768 [s]  
 X\_domain = 1H  
 X\_freq = 399.78219838 [MHz]  
 X\_offset = 5 [ppm]  
 X\_points = 32768  
 X\_prescans = 0  
 X\_resolution = 0.30517578 [Hz]  
 X\_sweep = 10 [kHz]  
 Irr\_domain = 1H  
 Irr\_freq = 399.78219838 [MHz]  
 Irr\_offset = 5 [ppm]  
 Tri\_domain = 1H  
 Tri\_freq = 399.78219838 [MHz]  
 Tri\_offset = 5 [ppm]  
 Clipped = FALSE  
 Mod\_return = 1  
 Scans = 8  
 Total\_scans = 8

X\_90\_width = 13.2 [us]  
 X\_acq\_time = 3.2768 [s]  
 X\_angle = 45 [deg]  
 X\_atn = 2.1 [dB]  
 X\_pulse = 6.6 [us]  
 Irr\_mode = Off  
 Tri\_mode = Off  
 Dante\_preset = FALSE  
 Initial\_wait = 1 [s]  
 Recvr\_gain = 40  
 Relaxation\_delay = 2 [s]  
 Repetition\_time = 5.2768 [s]  
 Temp\_get = 25.3 [dC]

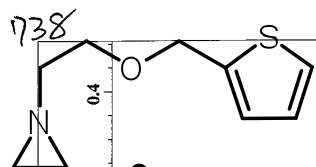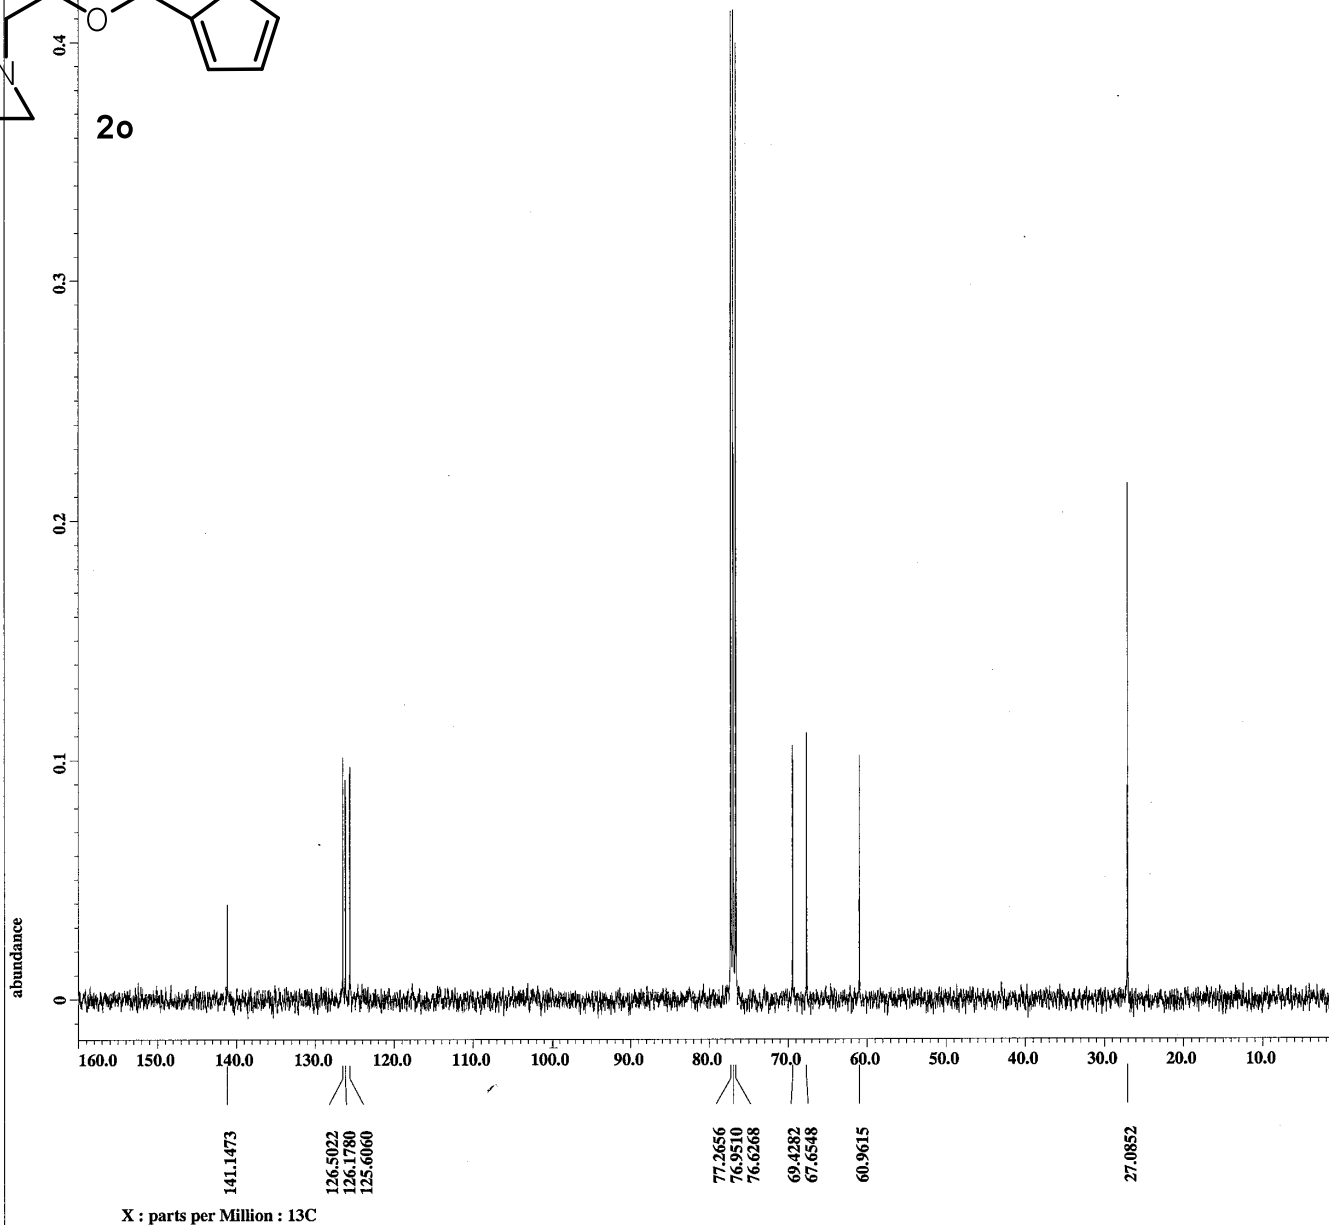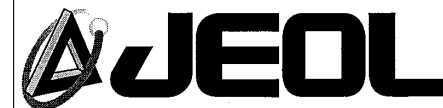

----- PROCESSING PARAMETERS -----  
dc\_balance : 0 : FALSE  
sexp : 2.0[Hz] : 0.0[s]  
trapezoid3 : 0[%] : 80[%] : 100[%]  
zerofill : 1  
fft : 1 : TRUE : TRUE  
machinephase  
ppm  
reference : 77.166[ppm] : 77[ppm]  
Derived from: 80-1405-1.jdf

Filename = 80-1405-4.jdf  
Author = delta  
Experiment = single\_pulse\_dec  
Sample\_id = 1  
Solvent = CHLOROFORM-D  
Creation\_time = 2-DEC-2011 11:15:02  
Revision\_time = 2-DEC-2011 11:14:07  
Current\_time = 2-DEC-2011 11:14:49

Comment = single pulse decouple  
Data\_format = 1D COMPLEX  
Dim\_size = 26214  
Dim\_title = 13C  
Dim\_units = [ppm]  
Dimensions = X  
Site = ECX 400P  
Spectrometer = DELTA2\_NMR

Field\_strength = 9.389766[T] (400[MHz])  
X\_acq\_duration = 1.04333312[s]  
X\_domain = 13C  
X\_freq = 100.52530333[MHz]  
X\_offset = 100[ppm]  
X\_points = 32768  
X\_prescans = 2  
X\_resolution = 0.95846665[Hz]  
X\_sweep = 31.40703518[kHz]  
Irr\_domain = 1H  
Irr\_freq = 399.78219838[MHz]  
Irr\_offset = 5[ppm]  
Clipped = FALSE  
Mod\_return = 1  
Scans = 101  
Total\_scans = 101

X\_90\_width = 8.5[us]  
X\_acq\_time = 1.04333312[s]  
X\_angle = 30[deg]  
X\_atn = 3.6[dB]  
X\_pulse = 2.83333333[us]  
Irr\_atn\_dec = 20.356[db]  
Irr\_atn\_noe = 20.356[db]  
Irr\_noise = WALFZ  
Decoupling = TRUE  
Initial\_wait = 1[s]  
Noe = TRUE  
Noe\_time = 3[s]  
Recvr\_gain = 52  
Relaxation\_delay = 3[s]  
Repetition\_time = 4.04333312[s]  
Temp\_get = 25.6[dc]

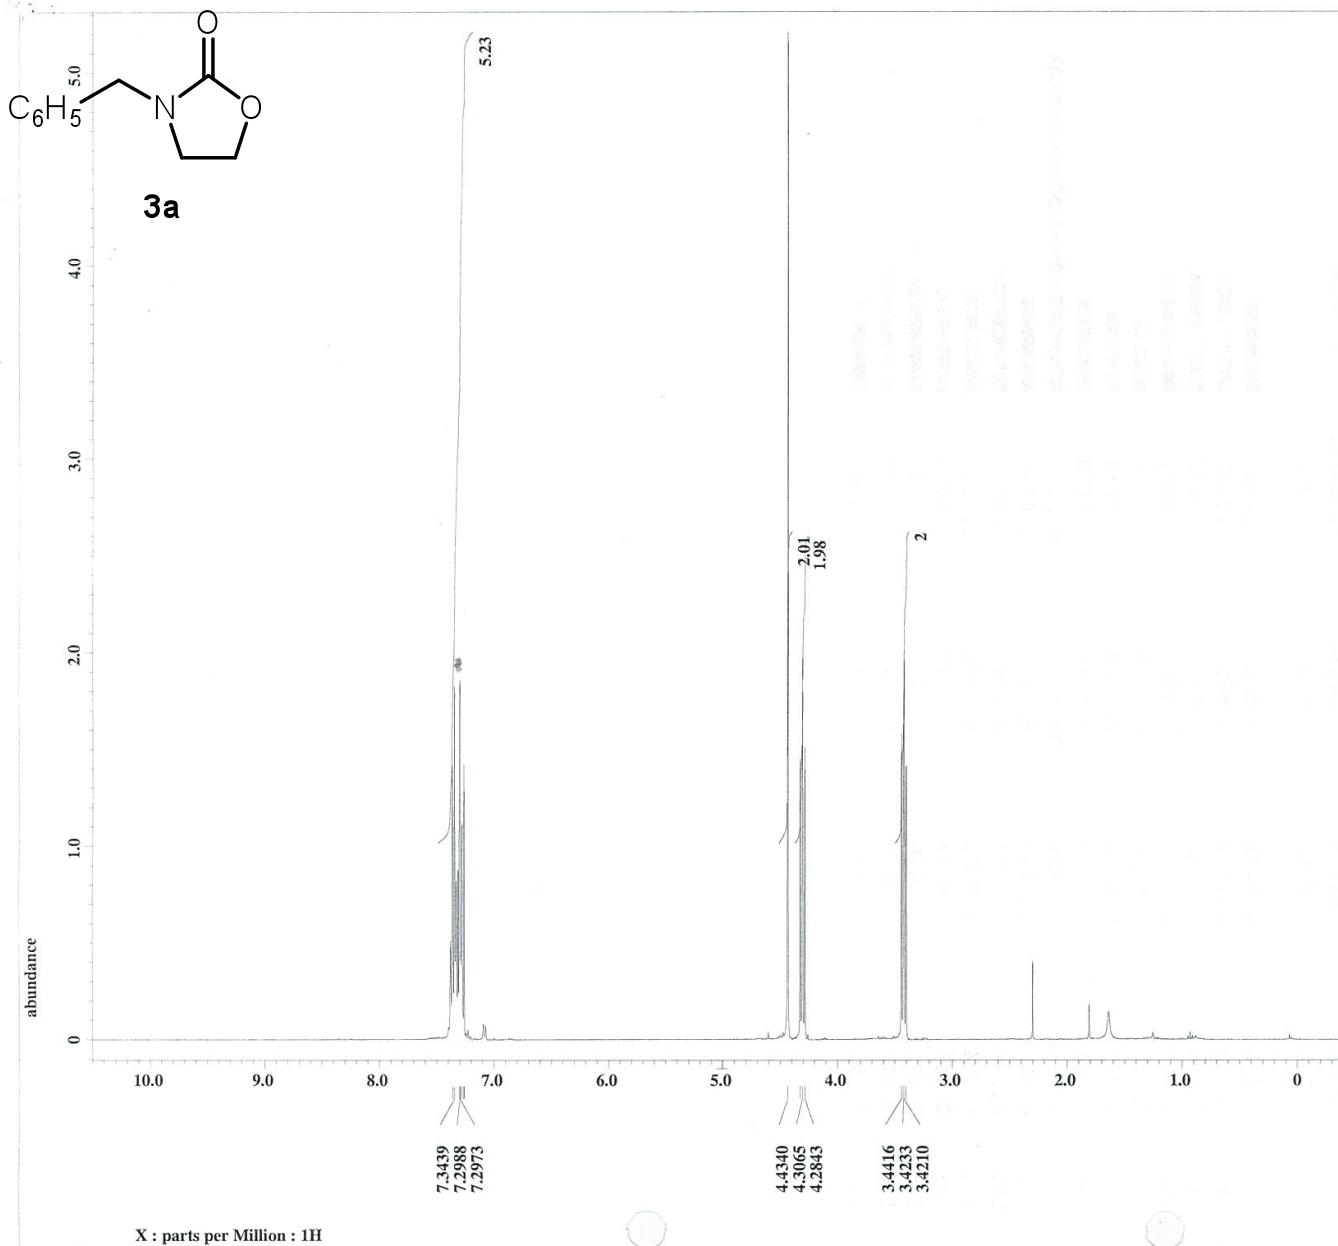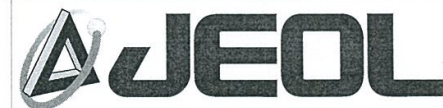

----- PROCESSING PARAMETERS -----  
dc\_balance : 0 : FALSE  
sexp : 0.2 [Hz] : 0.0 [s]  
trapezoid3 : 0 [%] : 80 [%] : 100 [%]  
zerofill : 1  
fft : 1 : TRUE : TRUE  
machinephase  
ppm  
reference : 7.252 [ppm] : 7.26 [ppm]  
phase : 0 : 0 : 50 [%]  
Derived from: 80-00424-519,r.t.,1H,CDC13

Filename = 80-00424-519,r.t.,1H,  
Author = delta  
Experiment = single\_pulse.ex2  
Sample\_id = 1  
Solvent = CHLOROFORM-D  
Creation\_time = 1-MAY-2010 00:29:41  
Revision\_time = 1-MAY-2010 00:30:07  
Current\_time = 1-MAY-2010 00:30:23

Comment = single\_pulse  
Data\_format = 1D\_COMPLEX  
Dim\_size = 26214  
Dim\_title = 1H  
Dim\_units = [ppm]  
Dimensions = X  
Site = ECX 400P  
Spectrometer = DELTA2\_NMR

Field\_strength = 9.389766 [T] (400 [MHz])  
X\_acq\_duration = 3.2768 [s]  
X\_domain = 1H  
X\_freq = 399.78219838 [MHz]  
X\_offset = 5 [ppm]  
X\_points = 32768  
X\_prescans = 0  
X\_resolution = 0.30517578 [Hz]  
X\_sweep = 10 [kHz]  
Irr\_domain = 1H  
Irr\_freq = 399.78219838 [MHz]  
Irr\_offset = 5 [ppm]  
Tri\_domain = 1H  
Tri\_freq = 399.78219838 [MHz]  
Tri\_offset = 5 [ppm]  
Clipped = FALSE  
Mod\_return = 10  
Scans = 16  
Total\_scans = 16

X\_90\_width = 12.8 [us]  
X\_acq\_time = 3.2768 [s]  
X\_angle = 45 [deg]  
X\_atn = 2.1 [dB]  
X\_pulse = 6.4 [us]  
Irr\_mode = Off  
Tri\_mode = Off  
Dante\_presat = FALSE  
Initial\_wait = 1 [s]  
Recvr\_gain = 44  
Relaxation\_delay = 2 [s]  
Repetition\_time = 5.2768 [s]  
Temp\_get = 23.6 [dC]

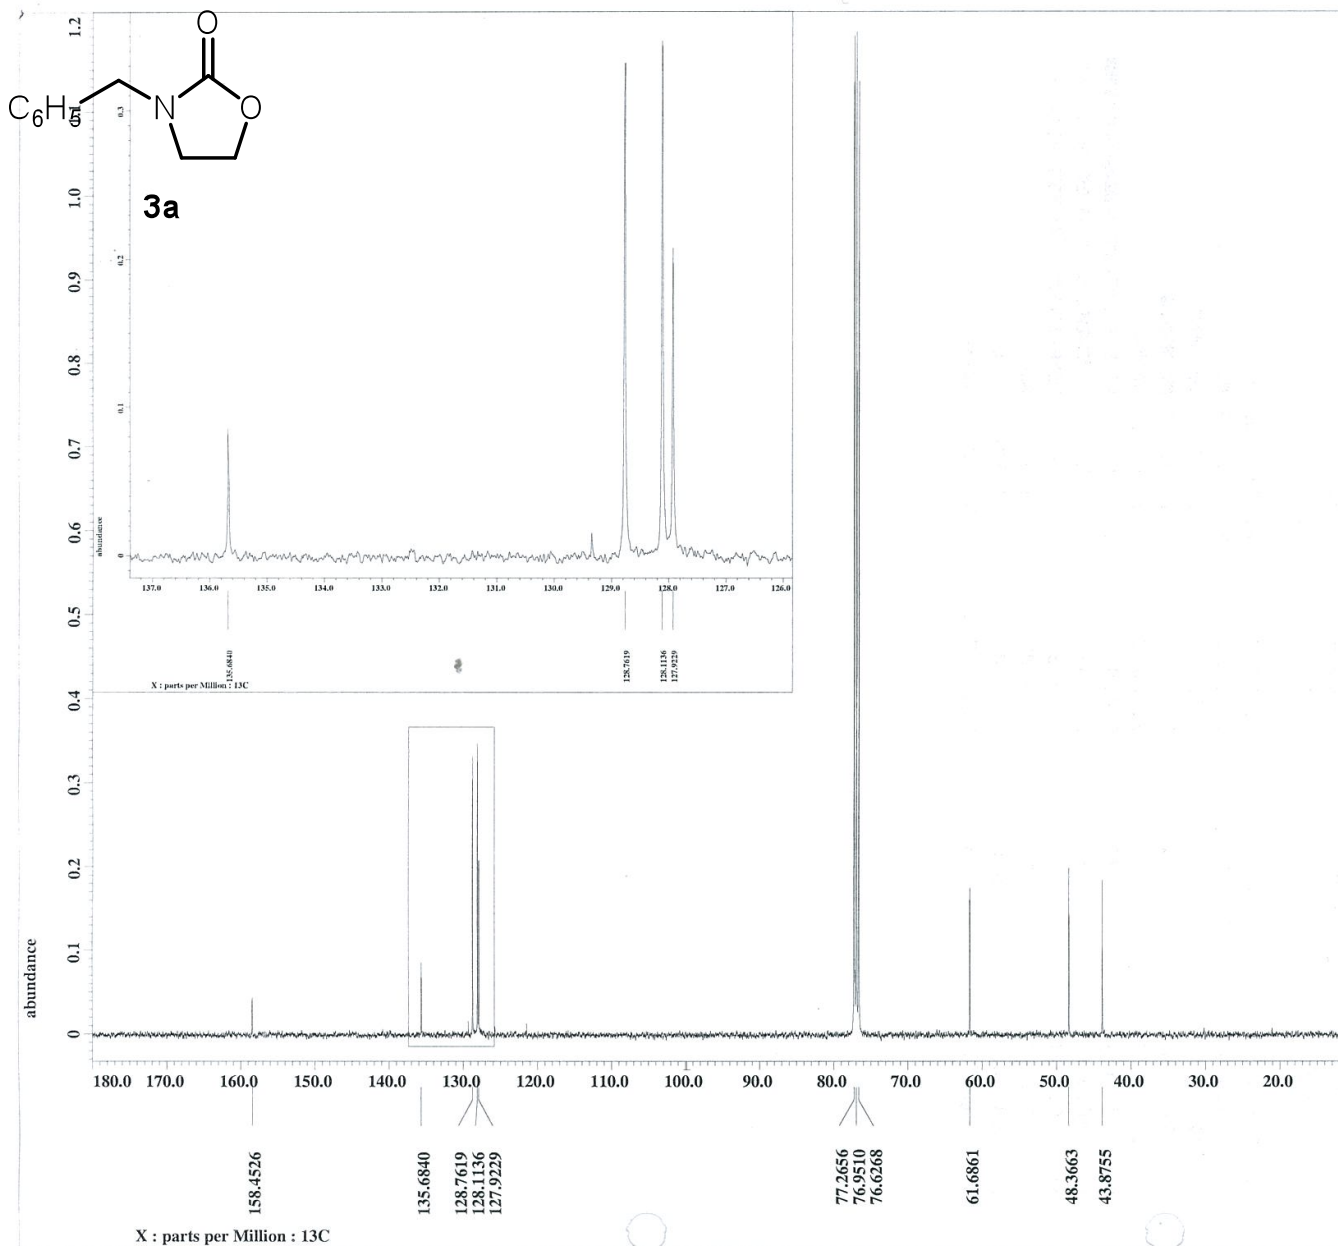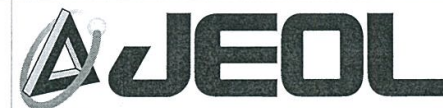

----- PROCESSING PARAMETERS -----  
 dc\_balance : 0 : FALSE  
 sexp : 2.0 [Hz] : 0.0 [s]  
 trapezoid3 : 0 [%] : 80 [%] : 100 [%]  
 zerofill : 1  
 fft : 1 : TRUE : TRUE  
 machinephase  
 ppm  
 reference : 77.166 [ppm] : 77 [ppm]  
 Derived from: 80-00424-519, r.t., 13C, CDCl

Filename = 80-00424-519, r.t., 13C  
 Author = delta  
 Experiment = single\_pulse\_dec  
 Sample\_id = 1  
 Solvent = CHLOROFORM-D  
 Creation\_time = 1-MAY-2010 01:35:36  
 Revision\_time = 1-MAY-2010 01:35:03  
 Current\_time = 1-MAY-2010 01:36:40

Comment = single pulse decouple  
 Data\_format = 1D COMPLEX  
 Dim\_size = 26214  
 Dim\_title = 13C  
 Dim\_units [ppm]  
 Dimensions = X  
 Site = ECX 400P  
 Spectrometer = DELTA2\_NMR

Field\_strength = 9.389766 [T] (400 [MHz])  
 X\_acq\_duration = 1.04333312 [s]  
 X\_domain = 13C  
 X\_freq = 100.52530333 [MHz]  
 X\_offset = 100 [ppm]  
 X\_points = 32768  
 X\_prescans = 2  
 X\_resolution = 0.95846665 [Hz]  
 X\_sweep = 31.40703518 [kHz]  
 Irr\_domain = 1H  
 Irr\_freq = 399.78219838 [MHz]  
 Irr\_offset = 5 [ppm]  
 Clipped = TRUE  
 Mod\_return = 1  
 Scans = 889  
 Total\_scans = 889

X\_90\_width = 9.5 [us]  
 X\_acq\_time = 1.04333312 [s]  
 X\_angle = 30 [deg]  
 X\_atn = 5.2 [dB]  
 X\_pulse = 3.16666667 [us]  
 Irr\_atn\_dec = 21.10216 [dB]  
 Irr\_atn\_noe = 21.10216 [dB]  
 Irr\_noise = WALTZ  
 Decoupling = TRUE  
 Initial\_wait = 1 [s]  
 Noe = TRUE  
 Noe\_time = 3 [s]  
 Recvr\_gain = 60  
 Relaxation\_delay = 3 [s]  
 Repetition\_time = 4.04333312 [s]  
 Temp\_get = 24 [dC]

GBn OK

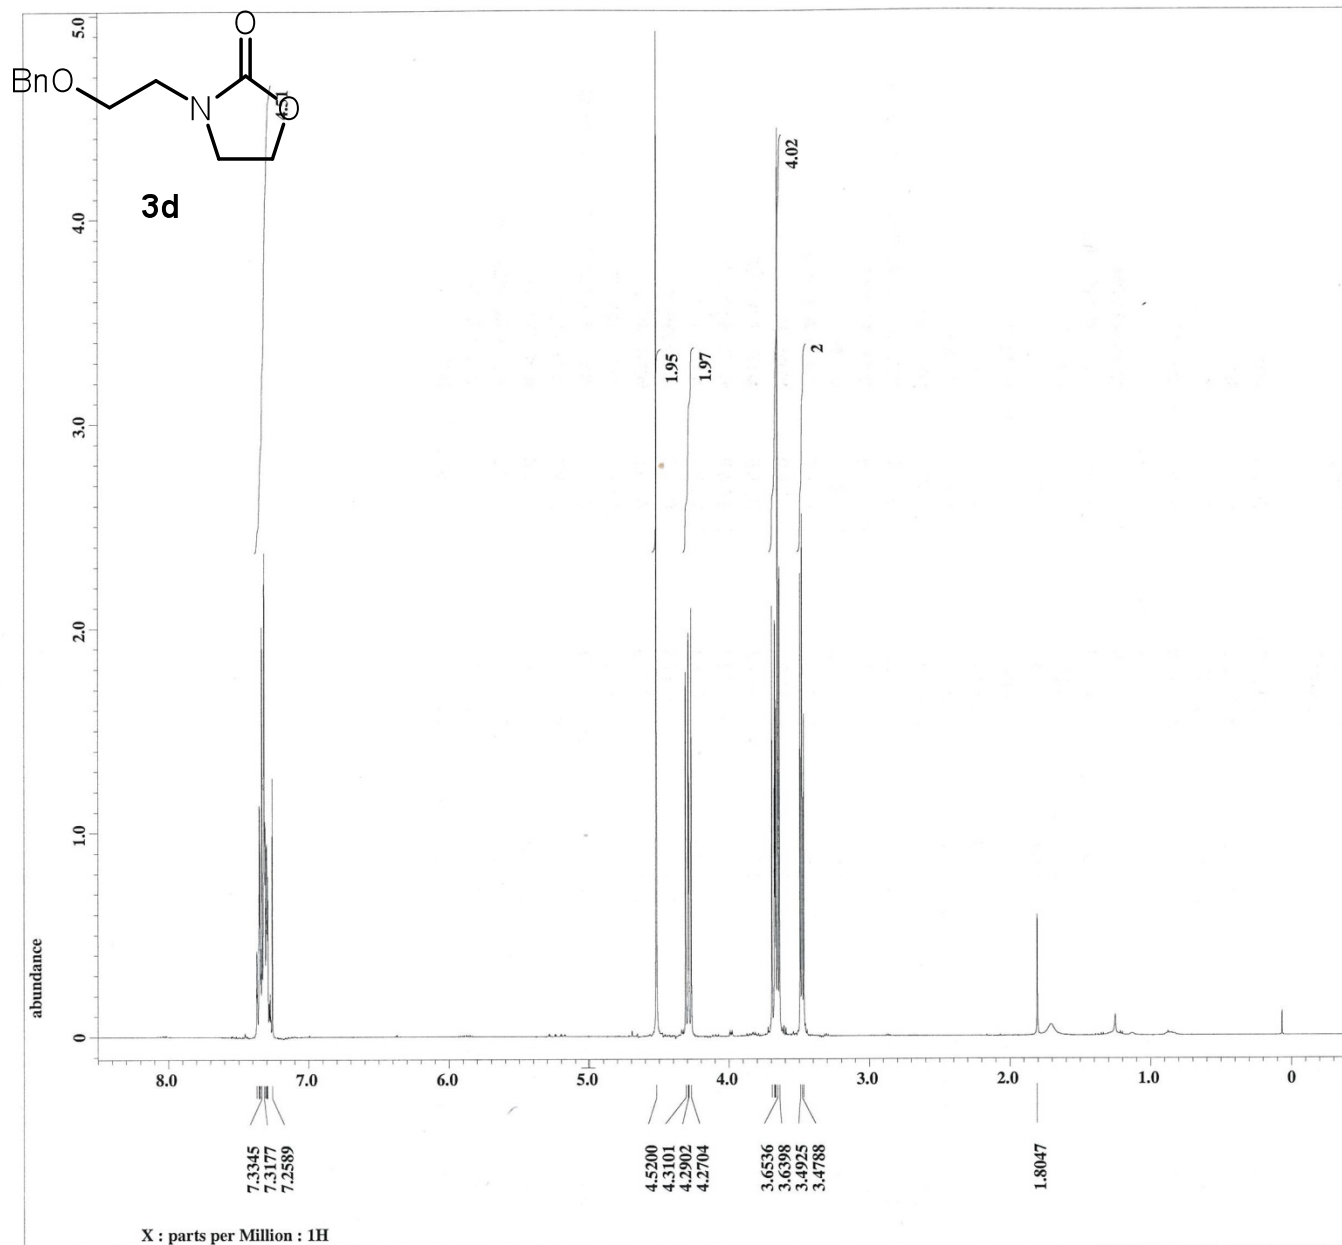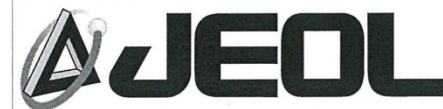

----- PROCESSING PARAMETERS -----  
 dc\_balance : 0 : FALSE  
 sexp : 0.2[Hz] : 0.0[s]  
 trapezoid3 : 0[%] : 80[%] : 100[%]  
 zerofill : 1  
 fft : 1 : TRUE : TRUE  
 machinephase  
 ppm  
 base\_correct : None : 0 : Smooth  
 reference : 7.253[ppm] : 7.26[ppm]  
 Derived from: 80-benzyloxyethyl-2-oxazol

Filename = 80-benzyloxyethyl-2-o  
 Author = delta  
 Experiment = single\_pulse.ex2  
 Sample\_id = 1  
 Solvent = CHLOROFORM-D  
 Creation\_time = 23-JAN-2012 18:47:02  
 Revision\_time = 23-JAN-2012 18:53:10  
 Current\_time = 23-JAN-2012 18:53:23

Comment = single\_pulse  
 Data\_format = 1D REAL  
 Dim\_size = 26214  
 Dim\_title = 1H  
 Dim\_units = [ppm]  
 Dimensions = X  
 Site = ECX 400P  
 Spectrometer = DELTA2\_NMR

Field\_strength = 9.389766[T] (400[MHz])  
 X\_acq\_duration = 3.2768[s]  
 X\_domain = 1H  
 X\_freq = 399.78219838[MHz]  
 X\_offset = 5[ppm]  
 X\_points = 32768  
 X\_prescans = 0  
 X\_resolution = 0.30517578[Hz]  
 X\_sweep = 10[kHz]  
 Irr\_domain = 1H  
 Irr\_freq = 399.78219838[MHz]  
 Irr\_offset = 5[ppm]  
 Tri\_domain = 1H  
 Tri\_freq = 399.78219838[MHz]  
 Tri\_offset = 5[ppm]  
 Clipped = FALSE  
 Mod\_return = 1  
 Scans = 16  
 Total\_scans = 16

X\_90\_width = 13.2[us]  
 X\_acq\_time = 3.2768[s]  
 X\_angle = 45[deg]  
 X\_atn = 2.1[dB]  
 X\_pulse = 6.6[us]  
 Irr\_mode = Off  
 Tri\_mode = Off  
 Dante\_presat = FALSE  
 Initial\_wait = 1[s]  
 Recvr\_gain = 38  
 Relaxation\_delay = 2[s]  
 Repetition\_time = 5.2768[s]  
 Temp\_get = 24.1[dC]

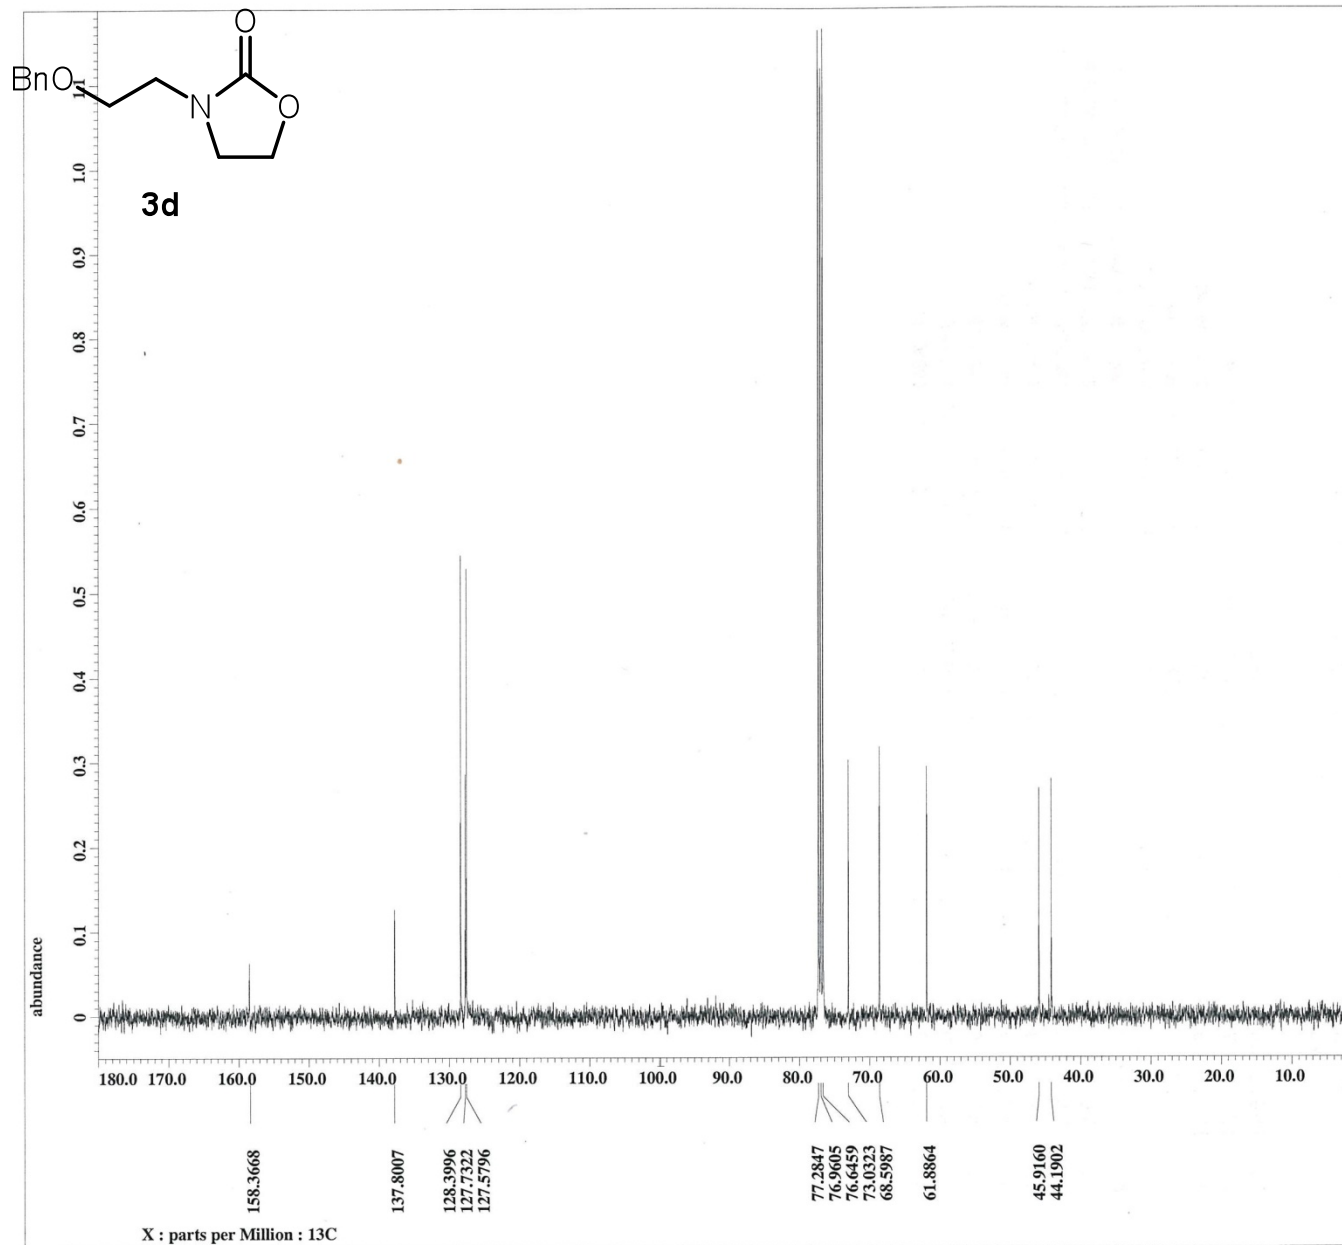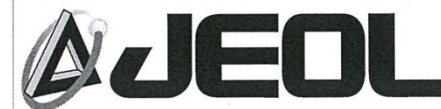

----- PROCESSING PARAMETERS -----  
 dc\_balance : 0 : FALSE  
 secp : 2.0[Hz] : 0.0[s]  
 trapezoid3 : 0[%] : 80[%] : 100[%]  
 zerofill : 1  
 fft : 1 : TRUE : TRUE  
 machinephase  
 ppm  
 reference : 77.166[ppm] : 77[ppm]  
 Derived from: 80-benzyloxyethyl-2-oxazol

Filename = 80-benzyloxyethyl-2-o  
 Author = delta  
 Experiment = single\_pulse\_dec  
 Sample\_id = 1  
 Solvent = CHLOROFORM-D  
 Creation\_time = 23-JAN-2012 18:57:02  
 Revision\_time = 23-JAN-2012 19:01:36  
 Current\_time = 23-JAN-2012 19:02:08

Comment = single pulse decouple  
 Data\_format = 1D COMPLEX  
 Dim\_size = 26214  
 Dim\_title = 13C  
 Dim\_units = [ppm]  
 Dimensions = X  
 Site = ECX 400P  
 Spectrometer = DELTA2\_NMR

Field\_strength = 9.389766[T] (400[MHz])  
 X\_acq\_duration = 1.04333312[s]  
 X\_domain = 13C  
 X\_freq = 100.52530333[MHz]  
 X\_offset = 100[ppm]  
 X\_points = 32768  
 X\_prescans = 2  
 X\_resolution = 0.95846665[Hz]  
 X\_sweep = 31.40703518[kHz]  
 Irr\_domain = 1H  
 Irr\_freq = 399.78219838[MHz]  
 Irr\_offset = 5[ppm]  
 Clipped = TRUE  
 Mod\_return = 1  
 Scans = 81  
 Total\_scans = 81

X\_90\_width = 8.5[us]  
 X\_acq\_time = 1.04333312[s]  
 X\_angle = 30[deg]  
 X\_atn = 3.6[dB]  
 X\_pulse = 2.83333333[us]  
 Irr\_atn\_dec = 20.356[dB]  
 Irr\_atn\_noe = 20.356[dB]  
 Irr\_noise = WALTZ  
 Decoupling = TRUE  
 Initial\_wait = 1[s]  
 Noe = TRUE  
 Noe\_time = 3[s]  
 Recvr\_gain = 60  
 Relaxation\_delay = 3[s]  
 Repetition\_time = 4.04333312[s]  
 Temp\_get = 24.4[degC]

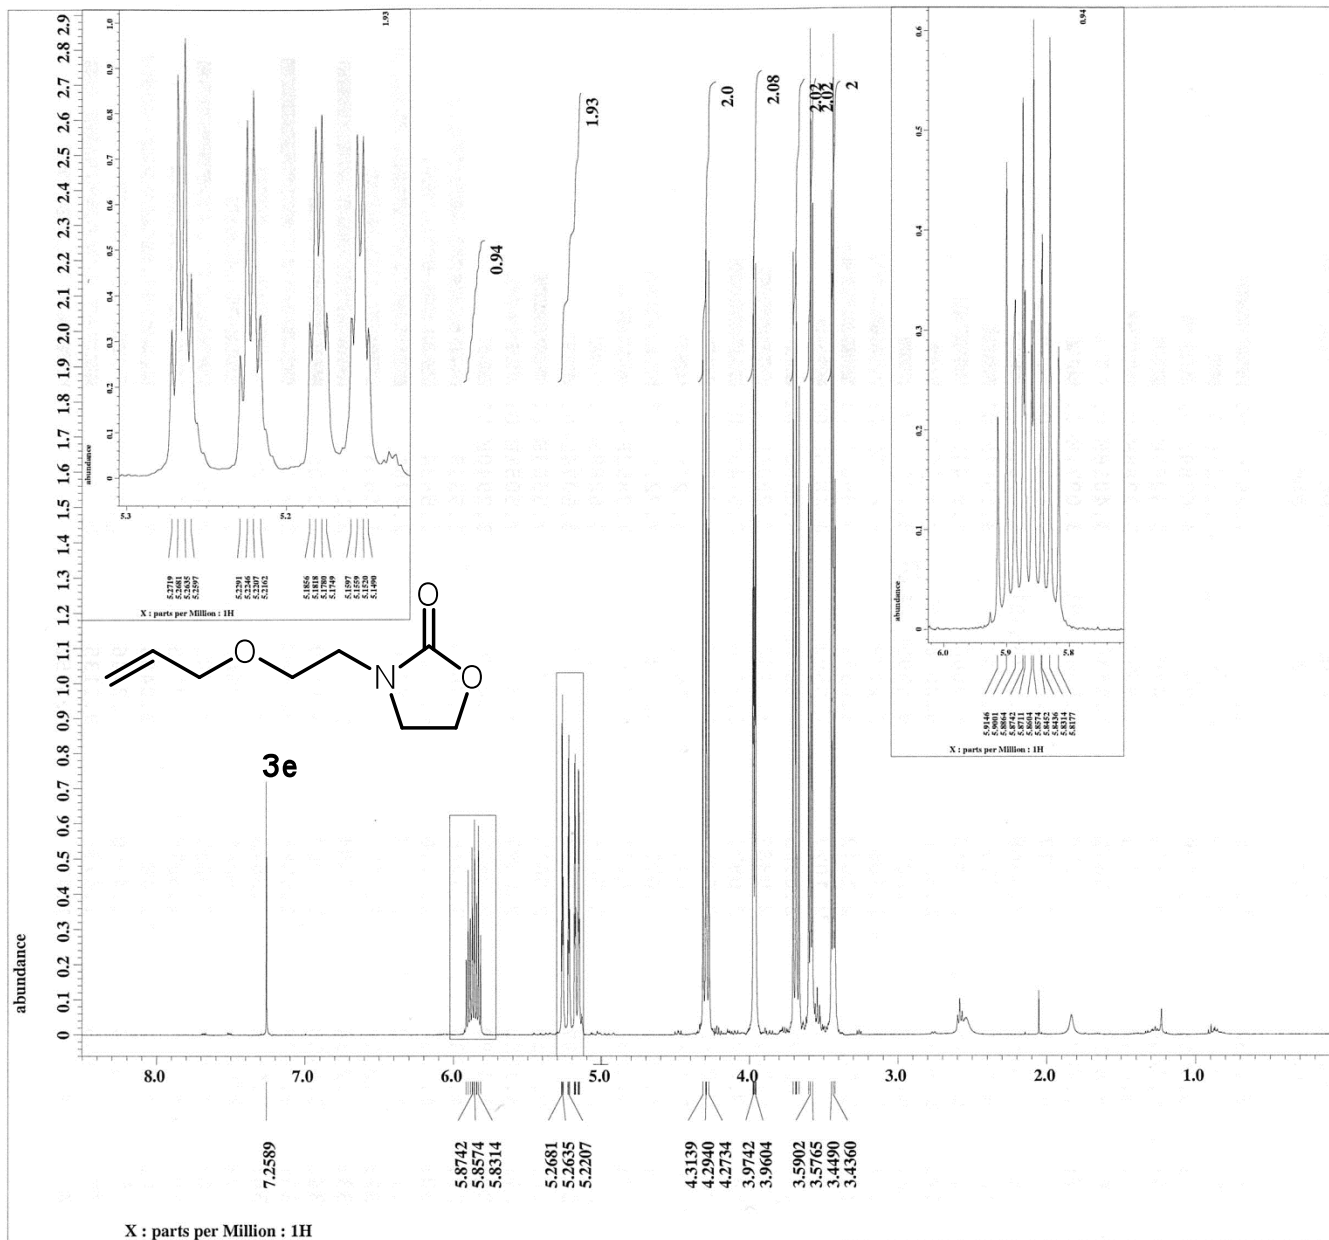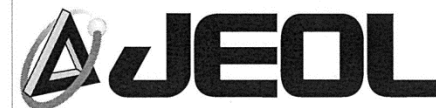

----- PROCESSING PARAMETERS -----  
 dc\_balance : 0 : FALSE  
 sexp : 0.2 [Hz] : 0.0 [s]  
 trapezoid3 : 0 [%] : 80 [%] : 100 [%]  
 zerofill : 1  
 fft : 1 : TRUE : TRUE  
 machinephase  
 ppm  
 base\_correct : None : 0 : Smooth  
 reference : 7.253 [ppm] : 7.26 [ppm]  
 Derived from: 80-al-one, r.t., 1H, CDC13-1.

Filename = 80-al-one, r.t., 1H, CDC  
 Author = delta  
 Experiment = single\_pulse.ex2  
 Sample\_id = 1  
 Solvent = CHLOROFORM-D  
 Creation\_time = 11-FEB-2012 19:03:52  
 Revision\_time = 11-FEB-2012 19:09:14  
 Current\_time = 11-FEB-2012 19:10:15

Comment = single\_pulse  
 Data\_format = 1D REAL  
 Dim\_size = 26214  
 Dim\_title = 1H  
 Dim\_units = [ppm]  
 Dimensions = X  
 Site = ECX 400P  
 Spectrometer = DELTA2\_NMR

Field\_strength = 9.389766 [T] (400 [MHz])  
 X\_acq\_duration = 3.2768 [s]  
 X\_domain = 1H  
 X\_freq = 399.78219838 [MHz]  
 X\_offset = 5 [ppm]  
 X\_points = 32768  
 X\_prescans = 0  
 X\_resolution = 0.30517578 [Hz]  
 X\_sweep = 10 [kHz]  
 Irr\_domain = 1H  
 Irr\_freq = 399.78219838 [MHz]  
 Irr\_offset = 5 [ppm]  
 Tri\_domain = 1H  
 Tri\_freq = 399.78219838 [MHz]  
 Tri\_offset = 5 [ppm]  
 Clipped = FALSE  
 Mod\_return = 1  
 Scans = 8  
 Total\_scans = 8

X\_90\_width = 13.2 [us]  
 X\_acq\_time = 3.2768 [s]  
 X\_angle = 45 [deg]  
 X\_atn = 2.1 [dB]  
 X\_pulse = 6.6 [us]  
 Irr\_mode = Off  
 Tri\_mode = Off  
 Dante\_presat = FALSE  
 Initial\_wait = 1 [s]  
 Recvr\_gain = 36  
 Relaxation\_delay = 2 [s]  
 Repetition\_time = 5.2768 [s]  
 Temp\_get = 24.5 [dC]



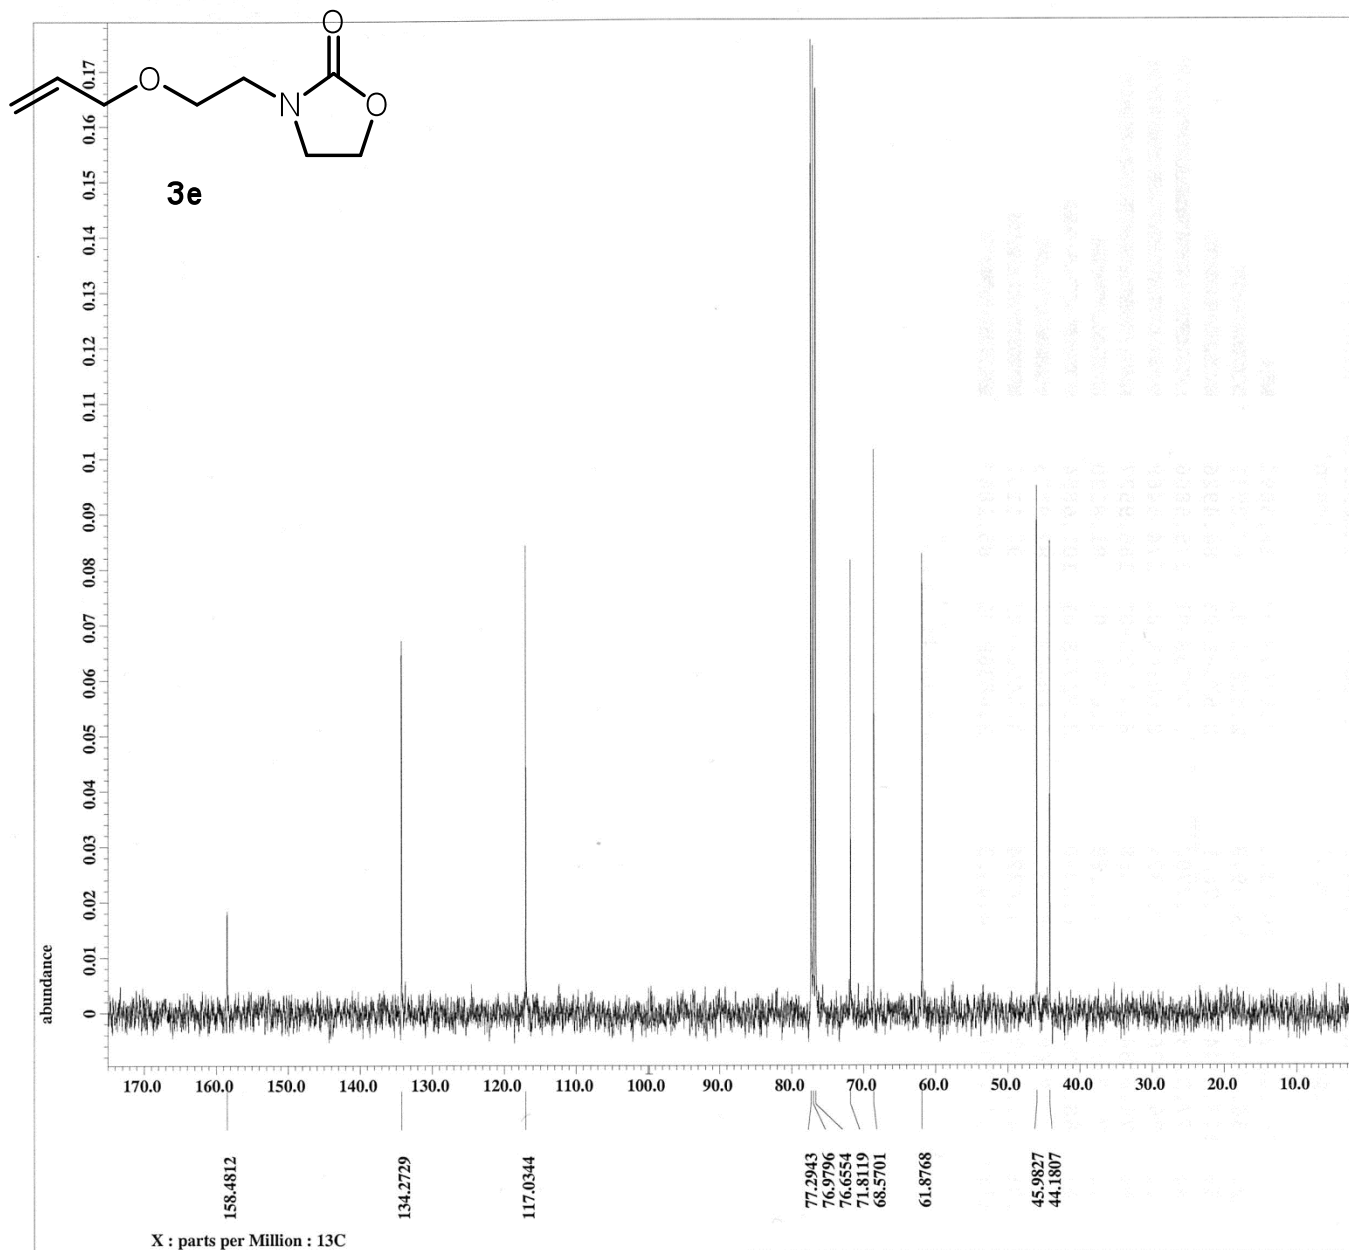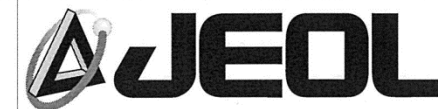

---- PROCESSING PARAMETERS ----  
dc\_balance : 0 : FALSE  
sexp : 2.0[Hz] : 0.0[s]  
trapezoid3 : 0[%] : 80[%] : 100[%]  
zerofill : 1  
fft : 1 : TRUE : TRUE  
machinephase  
ppm  
reference : 77.166[ppm] : 77[ppm]  
Derived from: 80-all,r.t.,13C,CDC13-1.jd

Filename = 80-all,r.t.,13C,CDC13  
Author = delta  
Experiment = single\_pulse\_dec  
Sample\_id = 1  
Solvent = CHLOROFORM-D  
Creation\_time = 11-FEB-2012 19:14:05  
Revision\_time = 11-FEB-2012 19:18:12  
Current\_time = 11-FEB-2012 19:18:33

Comment = single pulse decouple  
Data\_format = 1D COMPLEX  
Dim\_size = 26214  
Dim\_title = 13C  
Dim\_units = [ppm]  
Dimensions = X  
Site = ECX 400P  
Spectrometer = DELTA2\_NMR

Field\_strength = 9.389766[T] (400[MHz])  
X\_acq\_duration = 1.04333312[s]  
X\_domain = 13C  
X\_freq = 100.52530333[MHz]  
X\_offset = 100[ppm]  
X\_points = 32768  
X\_prescans = 2  
X\_resolution = 0.95846665[Hz]  
X\_sweep = 31.40703518[kHz]  
Irr\_domain = 1H  
Irr\_freq = 399.78219838[MHz]  
Irr\_offset = 5[ppm]  
Clipped = FALSE  
Mod\_return = 1  
Scans = 51  
Total\_scans = 51

X\_90\_width = 8.5[us]  
X\_acq\_time = 1.04333312[s]  
X\_angle = 30[deg]  
X\_atn = 3.6[dB]  
X\_pulse = 2.83333333[us]  
Irr\_atn\_dec = 20.356[dB]  
Irr\_atn\_noe = 20.356[dB]  
Irr\_noise = WALTZ  
Decoupling = TRUE  
Initial\_wait = 1[s]  
Noe = TRUE  
Noe\_time = 3[s]  
Recvr\_gain = 46  
Relaxation\_delay = 3[s]  
Repetition\_time = 4.04333312[s]  
Temp\_get = 24.8[°C]

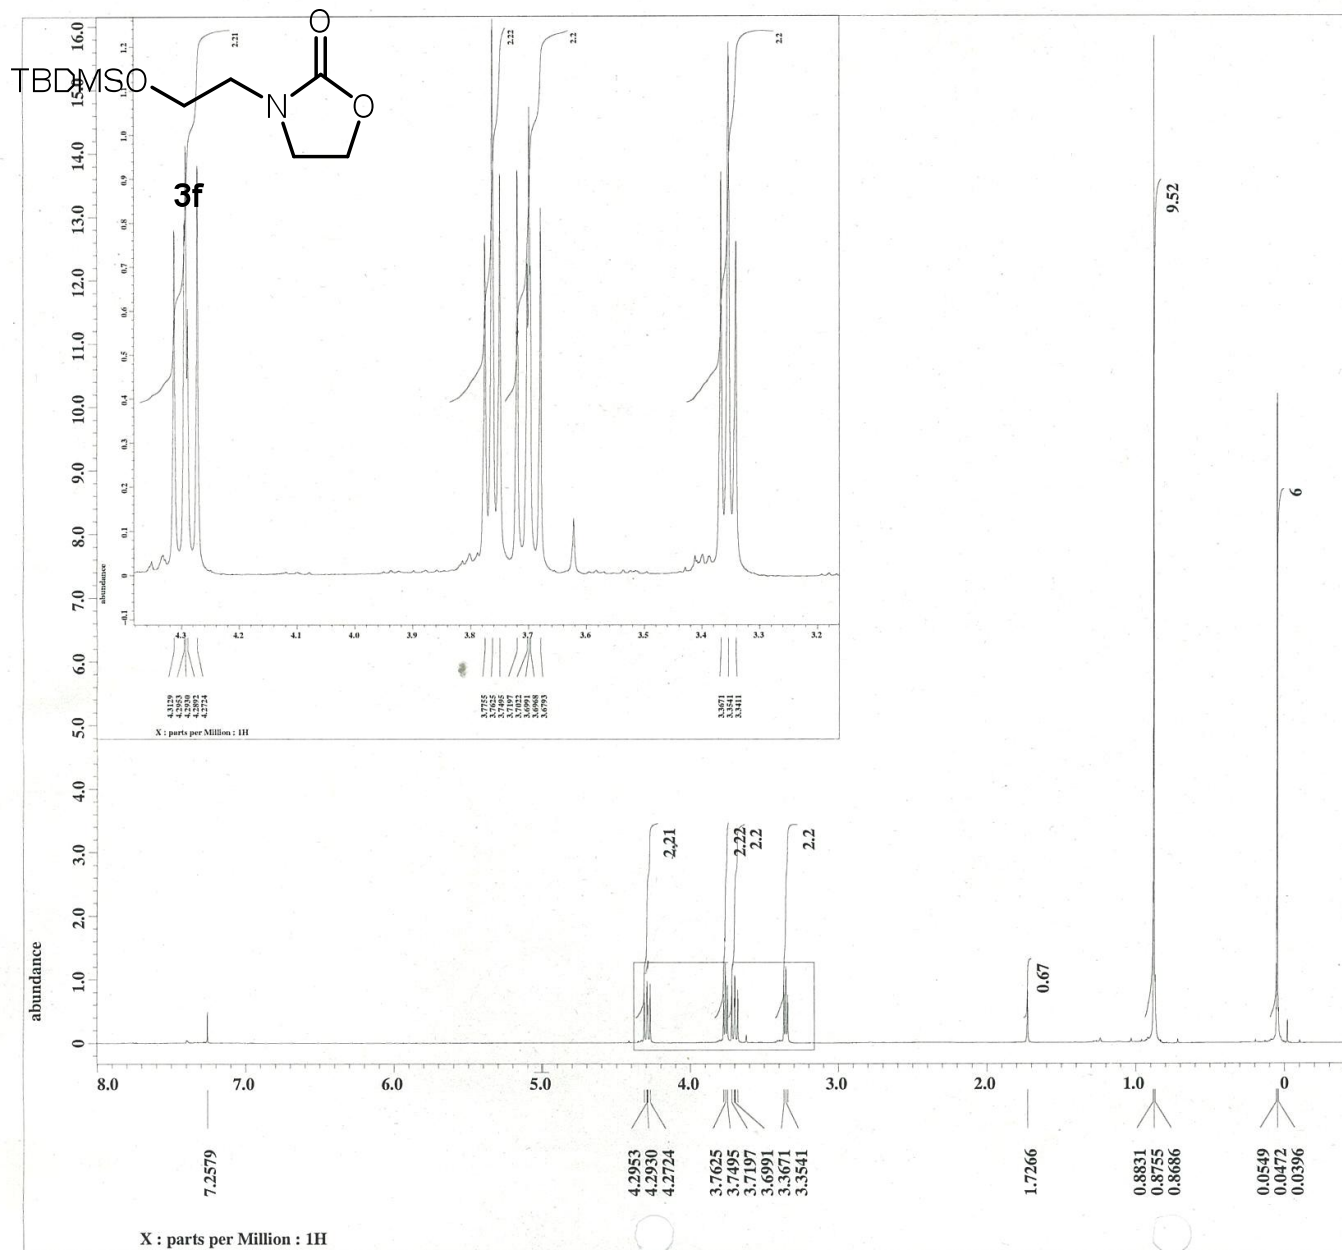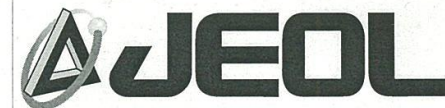

----- PROCESSING PARAMETERS -----  
 dc\_balance : 0 : FALSE  
 secp : 0.2 [Hz] : 0.0 [s]  
 trapezoid3 : 0 [%] : 80 [%] : 100 [%]  
 zerofill : 1  
 fft : 1 : TRUE : TRUE  
 machinephase  
 ppm  
 reference : 7.254 [ppm] : 7.26 [ppm]  
 Derived from: 80-817-2,r.t.,1H,CDC13-2.j

Filename = 80-817-2,r.t.,1H,CDC1  
 Author = delta  
 Experiment = single\_pulse.ex2  
 Sample\_id = 1  
 Solvent = CHLOROFORM-D  
 Creation\_time = 30-OCT-2010 14:18:13  
 Revision\_time = 30-OCT-2010 14:34:39  
 Current\_time = 30-OCT-2010 14:34:55

Comment = single\_pulse  
 Data\_format = 1D COMPLEX  
 Dim\_size = 26214  
 Dim\_title = 1H  
 Dim\_units = [ppm]  
 Dimensions = X  
 Site = ECX 400P  
 Spectrometer = DELTA2\_NMR

Field\_strength = 9.389766 [T] (400 [MHz])  
 X\_acq\_duration = 3.2768 [s]  
 X\_domain = 1H  
 X\_freq = 399.78219838 [MHz]  
 X\_offset = 5 [ppm]  
 X\_points = 32768  
 X\_prescans = 0  
 X\_resolution = 0.30517578 [Hz]  
 X\_sweep = 10 [kHz]  
 Irr\_domain = 1H  
 Irr\_freq = 399.78219838 [MHz]  
 Irr\_offset = 5 [ppm]  
 Tri\_domain = 1H  
 Tri\_freq = 399.78219838 [MHz]  
 Tri\_offset = 5 [ppm]  
 Clipped = FALSE  
 Mod\_return = 1  
 Scans = 4  
 Total\_scans = 4

X\_90\_width = 14 [us]  
 X\_acq\_time = 3.2768 [s]  
 X\_angle = 45 [deg]  
 X\_atn = 2.1 [dB]  
 X\_pulse = 7 [us]  
 Irr\_mode = Off  
 Tri\_mode = Off  
 Dante\_preset = FALSE  
 Initial\_wait = 1 [s]  
 Recvr\_gain = 32  
 Relaxation\_delay = 2 [s]  
 Repetition\_time = 5.2768 [s]  
 Temp\_get = 403.5 [dC]

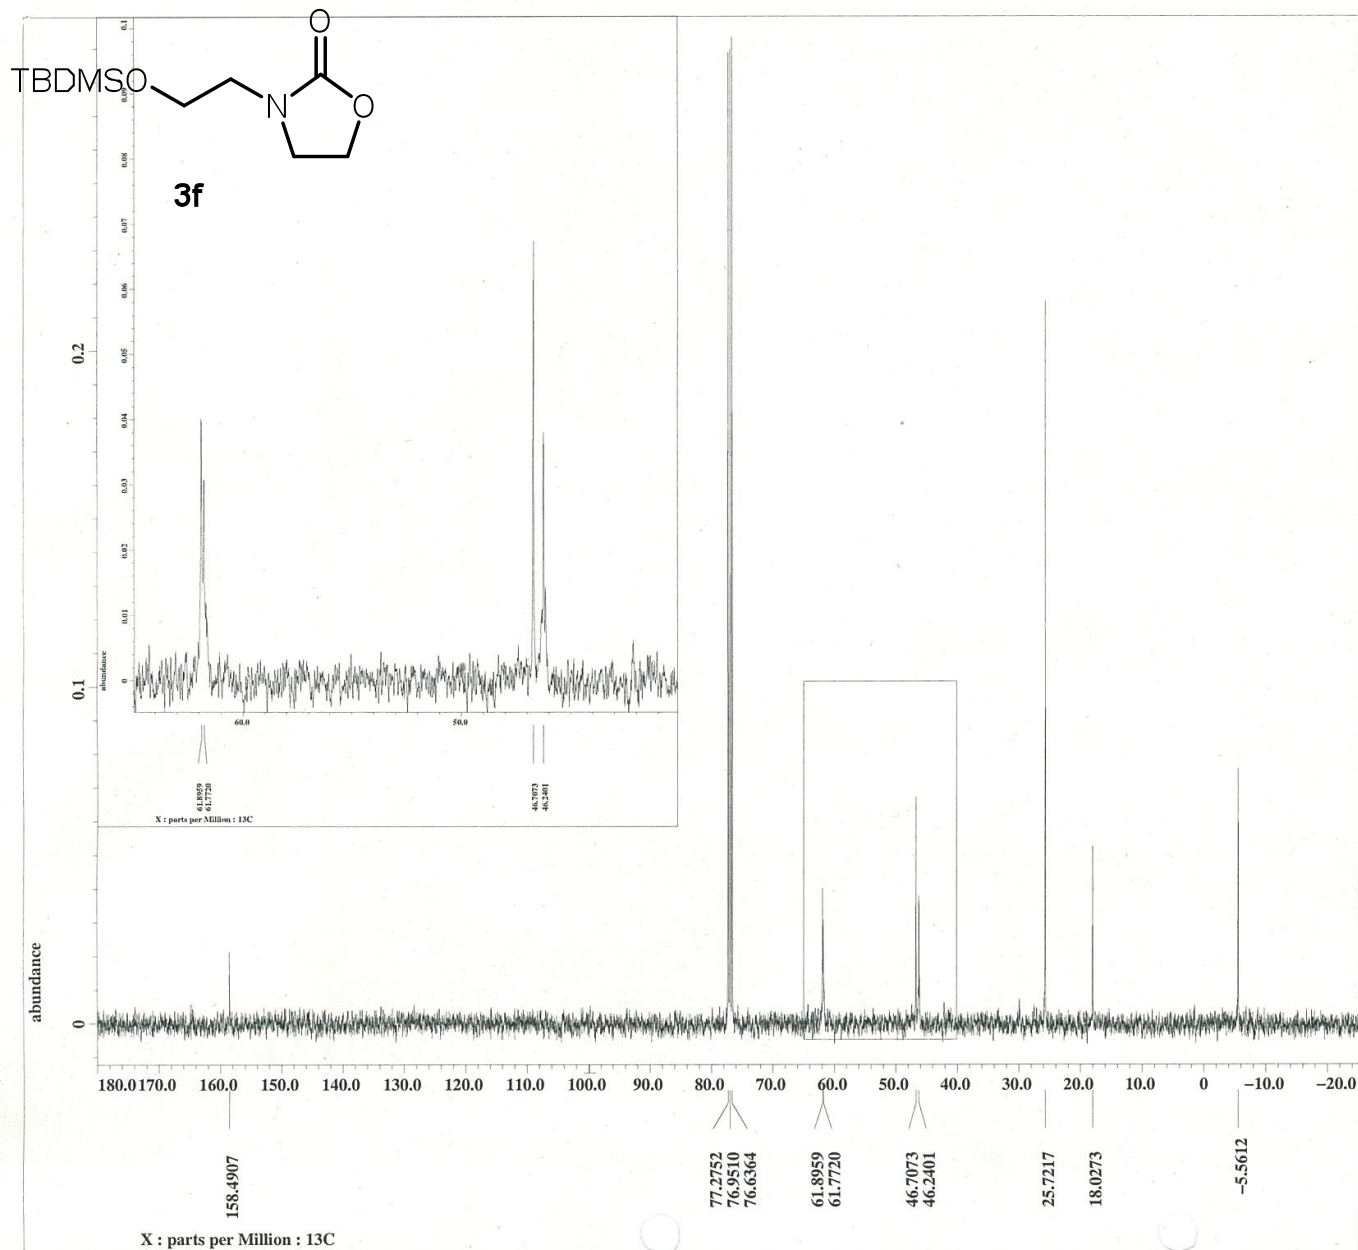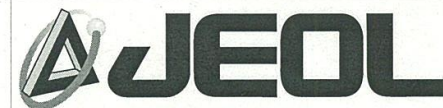

----- PROCESSING PARAMETERS -----  
dc\_balance : 0 : FALSE  
sexp : 2.0 [Hz] : 0.0 [s]  
trapezoid3 : 0 [%] : 80 [%] : 100 [%]  
zerofill : 1  
fft : 1 : TRUE : TRUE  
machinephase  
Dpm  
reference : 77.166 [ppm] : 77 [ppm]  
Derived from: 80-817,r.t.,13C,CDC13-1.jd

Filename = 80-817,r.t.,13C,CDC13  
Author = delta  
Experiment = single\_pulse\_dec  
Sample\_id = 1  
Solvent = CHLOROFORM-D  
Creation\_time = 30-OCT-2010 14:28:20  
Revision\_time = 30-OCT-2010 14:38:34  
Current\_time = 30-OCT-2010 14:39:00

Comment = single pulse decouple  
Data\_format = 1D COMPLEX  
Dim\_size = 26214  
Dim\_title = 13C  
Dim\_units = [ppm]  
Dimensions = X  
Site = ECX 400P  
Spectrometer = DELTA2\_NMR

Field\_strength = 9.389766 [T] (400 [MHz])  
X\_acq\_duration = 1.04333312 [s]  
X\_domain = 13C  
X\_freq = 100.52530333 [MHz]  
X\_offset = 100 [ppm]  
X\_points = 32768  
X\_prescans = 2  
X\_resolution = 0.95846665 [Hz]  
X\_sweep = 31.40703518 [kHz]  
Irr\_domain = 1H  
Irr\_freq = 399.78219838 [MHz]  
Irr\_offset = 5 [ppm]  
Clipped = FALSE  
Mod\_return = 1  
Scans = 101  
Total\_scans = 101

X\_90\_width = 11.8 [us]  
X\_acq\_time = 1.04333312 [s]  
X\_angle = 30 [deg]  
X\_atn = 6 [dB]  
X\_pulse = 3.93333333 [us]  
Irr\_atn\_dec = 21.035 [dB]  
Irr\_atn\_noe = 21.035 [dB]  
Irr\_noise = WALTZ  
Decoupling = TRUE  
Initial\_wait = 1 [s]  
Noe = TRUE  
Noe\_time = 3 [s]  
Recvr\_gain = 50  
Relaxation\_delay = 3 [s]  
Repetition\_time = 4.04333312 [s]  
Temp\_get = 403.5 [dC]

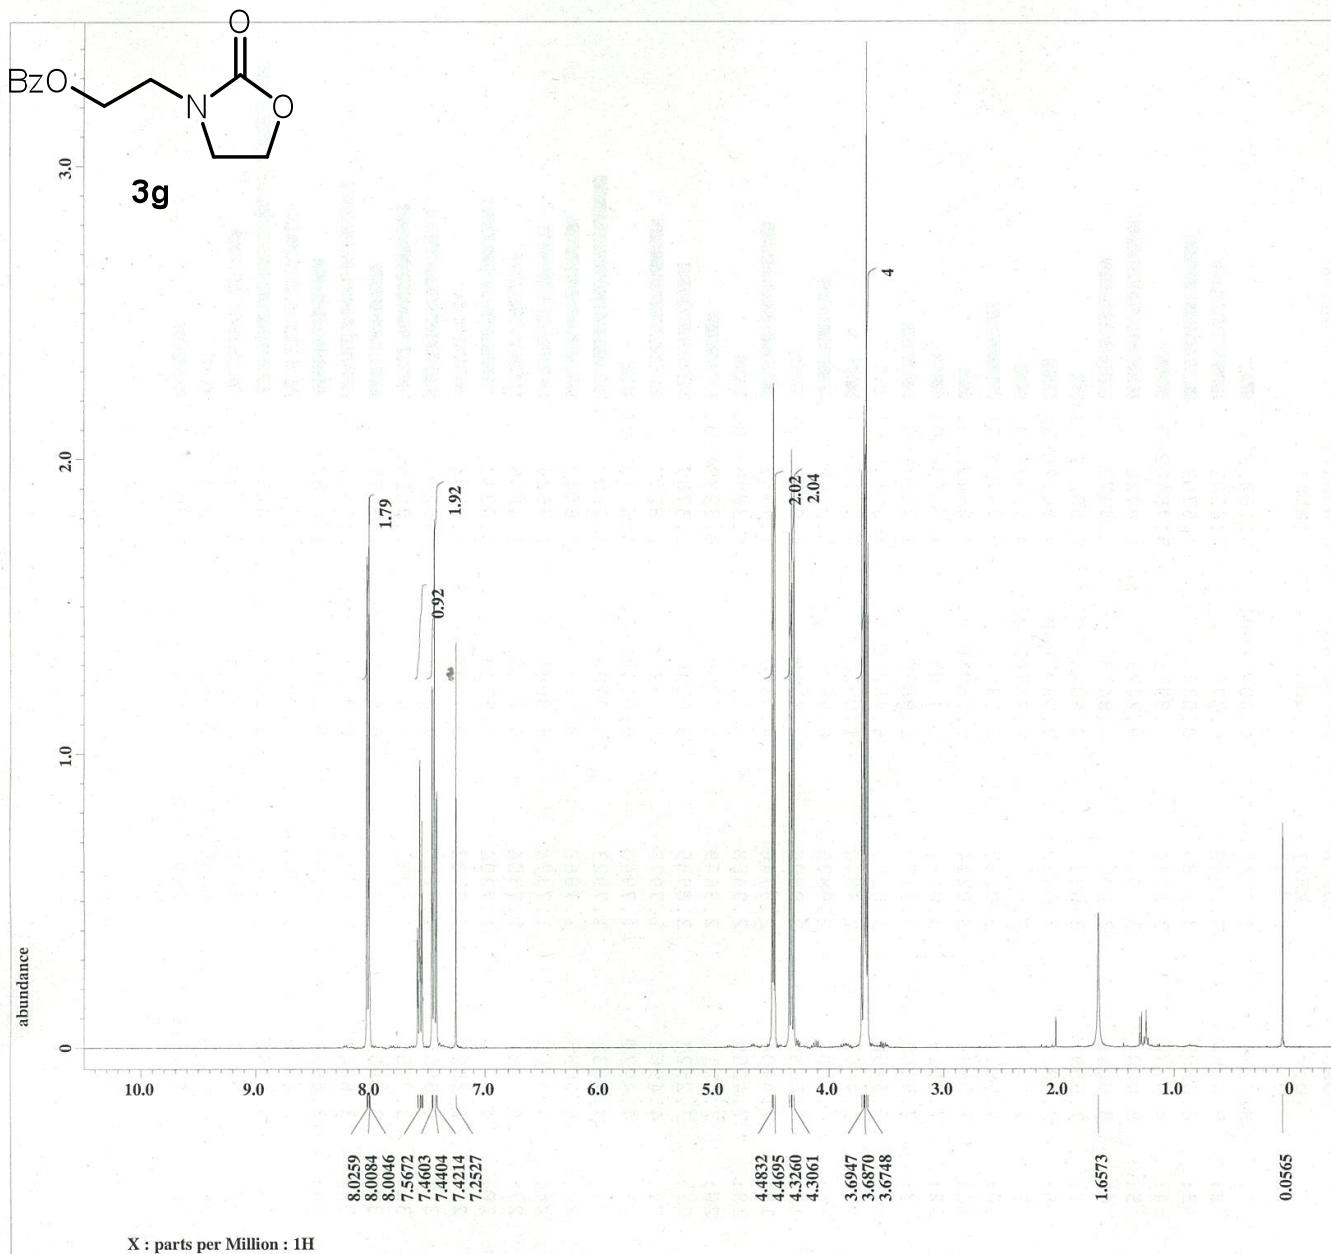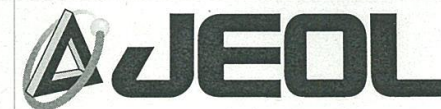

---- PROCESSING PARAMETERS ----  
 dc\_balance : 0 : FALSE  
 sexp : 0.2[Hz] : 0.0[s]  
 trapezoid3 : 0[%] : 80[%] : 100[%]  
 zerofill : 1  
 fft : 1 : TRUE : TRUE  
 machinephase  
 ppm  
 Derived from: 80-1103,r.t.,1H,CDCl3-3.jd

Filename = 80-1103,r.t.,1H,CDCl3  
 Author = delta  
 Experiment = single\_pulse.ex2  
 Sample\_id = 1  
 Solvent = CHLOROFORM-D  
 Creation\_time = 20-MAY-2011 15:14:12  
 Revision\_time = 20-MAY-2011 15:18:44  
 Current\_time = 20-MAY-2011 15:18:55

Comment = single\_pulse  
 Data\_format = 1D COMPLEX  
 Dim\_size = 26214  
 Dim\_title = 1H  
 Dim\_units = [ppm]  
 Dimensions = X  
 Site = ECX 400P  
 Spectrometer = DELTA2\_NMR

Field\_strength = 9.389766[T] (400[MHz])  
 X\_acq\_duration = 3.2768[s]  
 X\_domain = 1H  
 X\_freq = 399.78219838[MHz]  
 X\_offset = 5[ppm]  
 X\_points = 32768  
 X\_prescans = 0  
 X\_resolution = 0.30517578[Hz]  
 X\_sweep = 10[kHz]  
 Irr\_domain = 1H  
 Irr\_freq = 399.78219838[MHz]  
 Irr\_offset = 5[ppm]  
 Tri\_domain = 1H  
 Tri\_freq = 399.78219838[MHz]  
 Tri\_offset = 5[ppm]  
 Clipped = FALSE  
 Mod\_return = 1  
 Scans = 8  
 Total\_scans = 8

X\_90\_width = 13.2[us]  
 X\_acq\_time = 3.2768[s]  
 X\_angle = 45[deg]  
 X\_atn = 2.1[dB]  
 X\_pulse = 6.6[us]  
 Irr\_mode = Off  
 Tri\_mode = Off  
 Dante\_presat = FALSE  
 Initial\_wait = 1[s]  
 Recvr\_gain = 40  
 Relaxation\_delay = 2[s]  
 Repetition\_time = 5.2768[s]  
 Temp\_get = 25.2[dC]

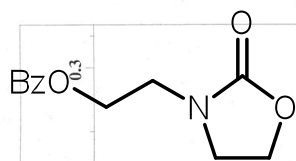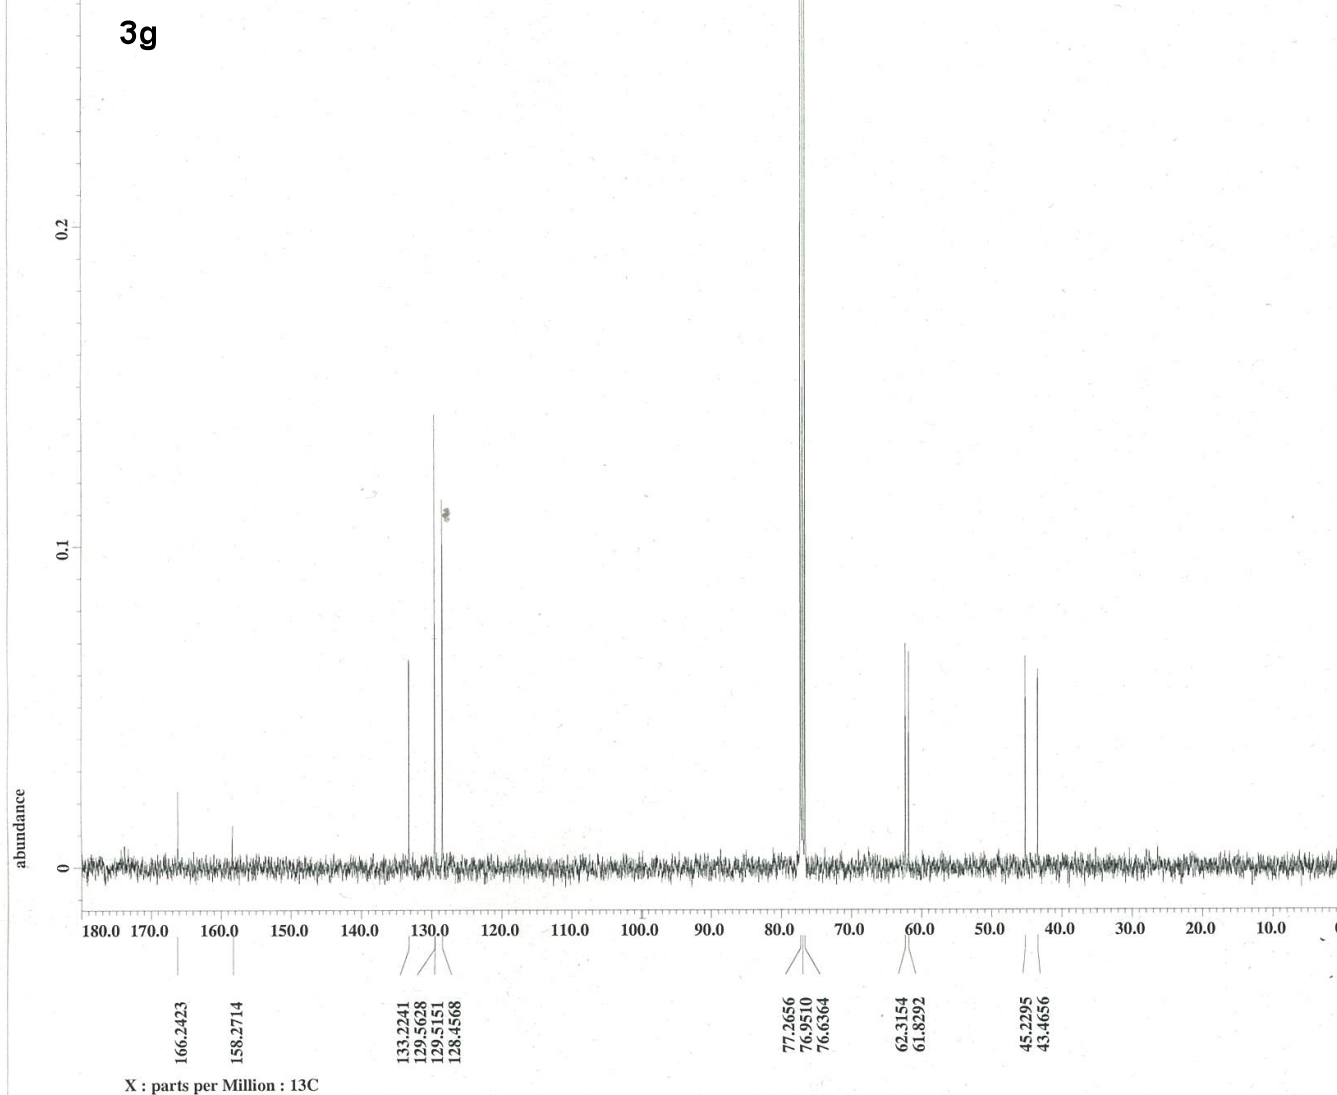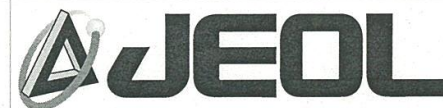

----- PROCESSING PARAMETERS -----  
dc\_balance : 0 : FALSE  
sexp : 2.0 [Hz] : 0.0 [s]  
trapezoid3 : 0 [%] : 80 [%] : 100 [%]  
zerofill : 1  
fft : 1 : TRUE : TRUE  
machinephase  
Dpm  
reference : 77.166 [ppm] : 77 [ppm]  
Derived from: 80-1103,r.t.,13C,CDC13-2.j

Filename = 80-1103,r.t.,13C,CDC1  
Author = delta  
Experiment = single\_pulse\_dec  
Sample\_id = 1  
Solvent = CHLOROFORM-D  
Creation\_time = 20-MAY-2011 15:23:24  
Revision\_time = 20-MAY-2011 15:23:59  
Current\_time = 20-MAY-2011 15:24:18

Comment = single pulse decouple  
Data\_format = 1D COMPLEX  
Dim\_size = 26214  
Dim\_title = 13C  
Dim\_units = [ppm]  
Dimensions = X  
Site = ECX 400P  
Spectrometer = DELTA2\_NMR

Field\_strength = 9.389766 [T] (400 [MHz])  
X\_acq\_duration = 1.04333312 [s]  
X\_domain = 13C  
X\_freq = 100.52530333 [MHz]  
X\_offset = 100 [ppm]  
X\_points = 32768  
X\_prescans = 2  
X\_resolution = 0.95846665 [Hz]  
X\_sweep = 31.40703518 [kHz]  
Irr\_domain = 1H  
Irr\_freq = 399.78219838 [MHz]  
Irr\_offset = 5 [ppm]  
Clipped = FALSE  
Mod\_return = 1  
Scans = 67  
Total\_scans = 67

X\_90\_width = 8.5 [us]  
X\_acq\_time = 1.04333312 [s]  
X\_angle = 30 [deg]  
X\_atn = 3.6 [dB]  
X\_pulse = 2.83333333 [us]  
Irr\_atn\_dec = 20.356 [dB]  
Irr\_atn\_noe = 20.356 [dB]  
Irr\_noise = WALTZ  
Decoupling = TRUE  
Initial\_wait = 1 [s]  
Noe = TRUE  
Noe\_time = 3 [s]  
Recvr\_gain = 48  
Relaxation\_delay = 3 [s]  
Repetition\_time = 4.04333312 [s]  
Temp\_get = 25.4 [dC]

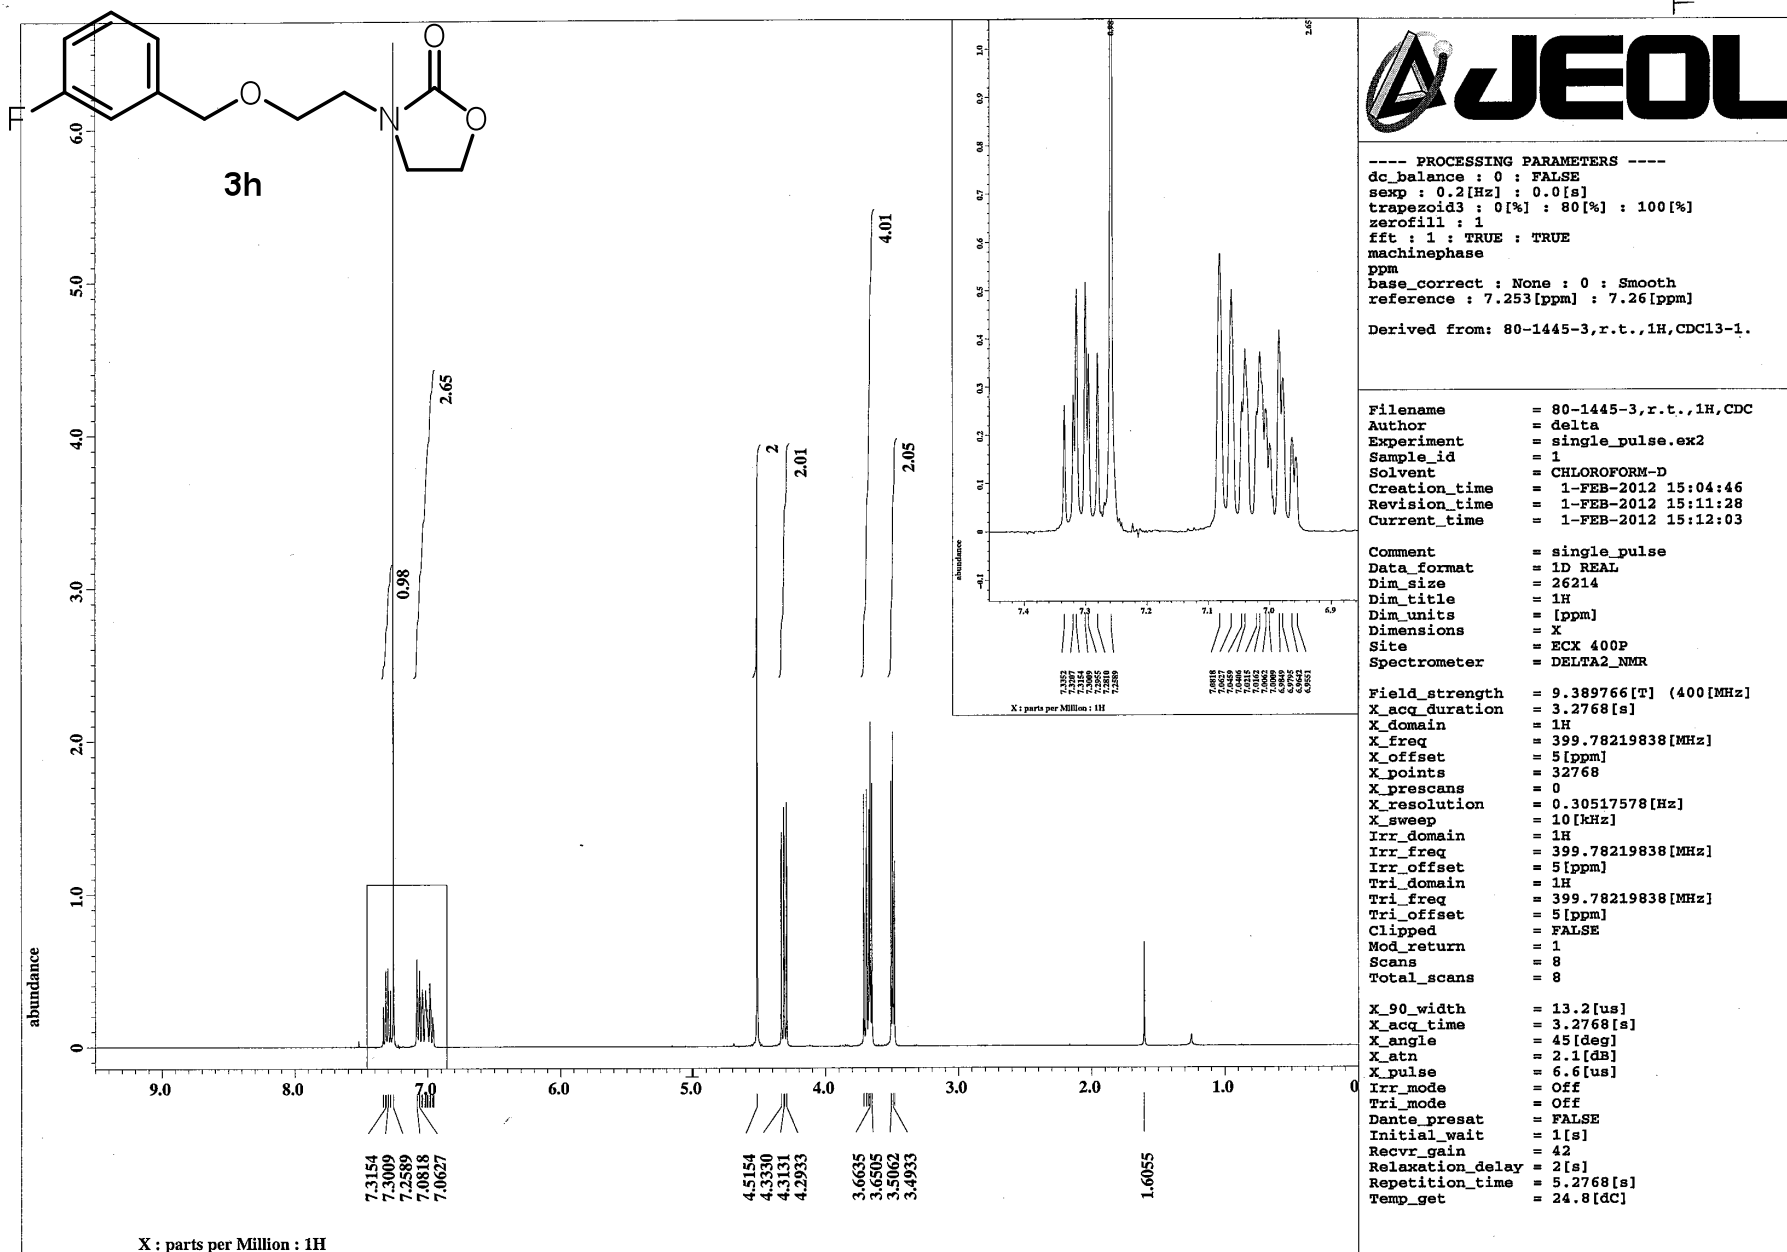

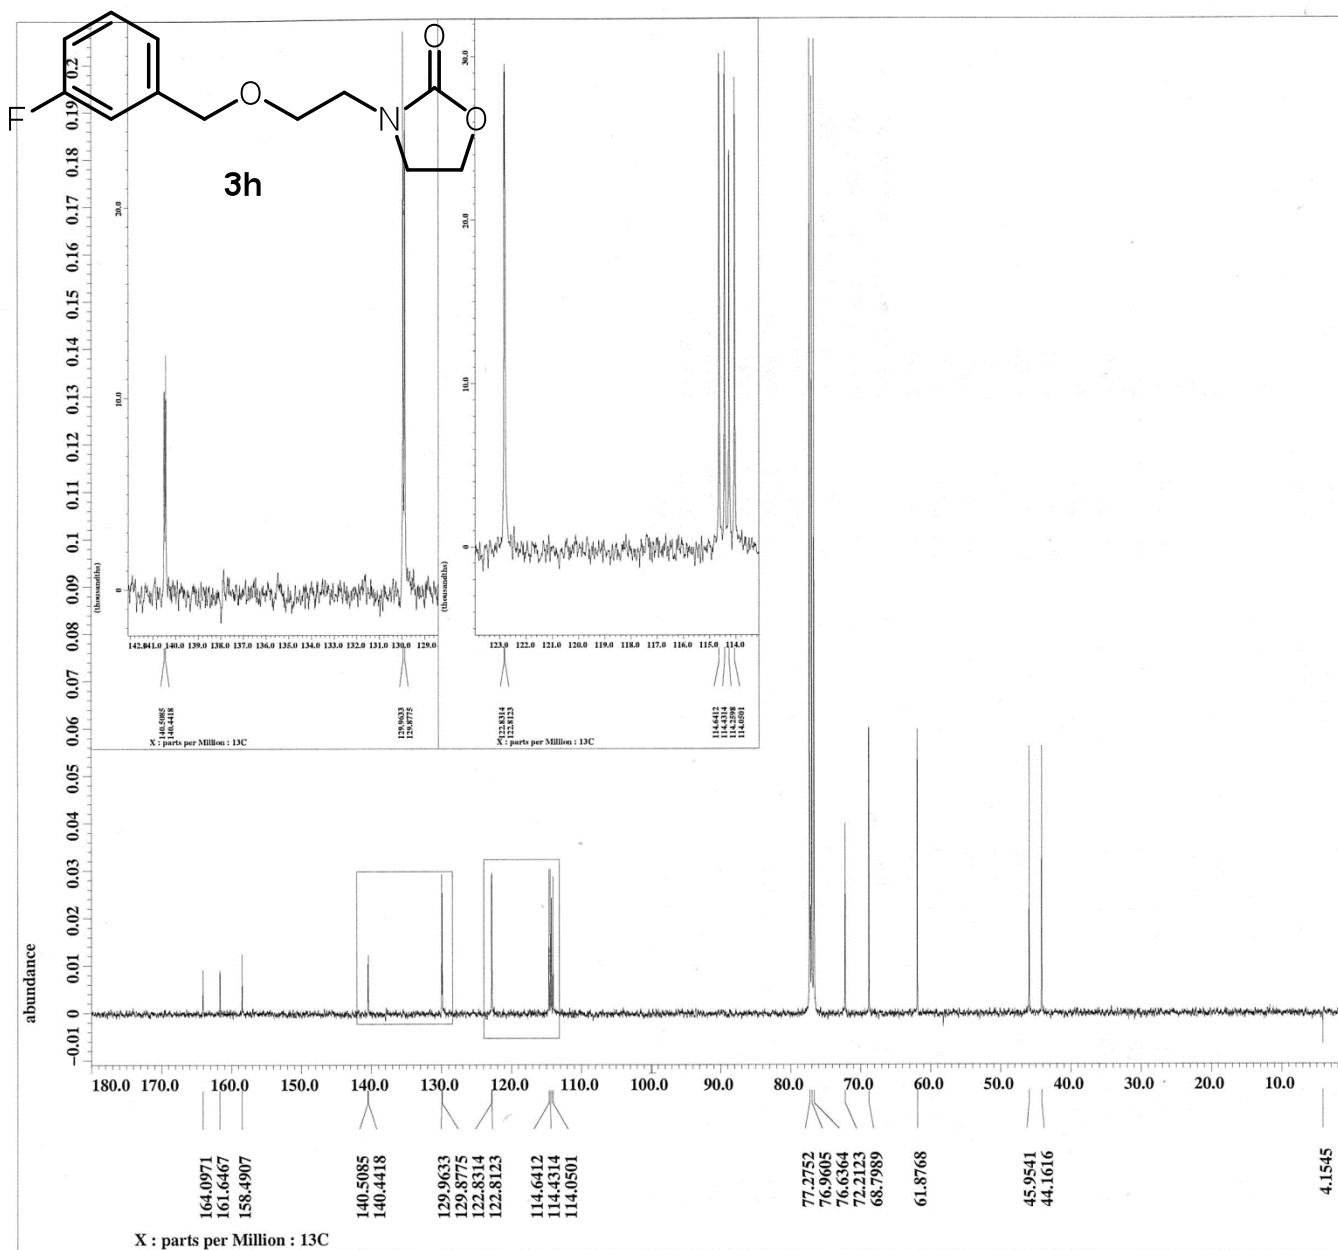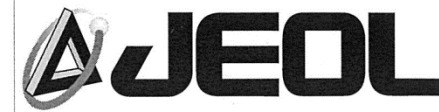

---- PROCESSING PARAMETERS ----  
dc\_balance : 0 : FALSE  
sexp : 2.0[Hz] : 0.0[s]  
trapezoid3 : 0[%] : 80[%] : 100[%]  
zerofill : 1  
fft : 1 : TRUE : TRUE  
machinephase  
ppm  
reference : 77.166[ppm] : 77[ppm]  
Derived from: 80-F-2,r.t.,1H,CDC13-1.jdf

Filename = 80-F-2,r.t.,1H,CDC13-  
Author = delta  
Experiment = single\_pulse\_dec  
Sample\_id = 1  
Solvent = CHLOROFORM-D  
Creation\_time = 8-FEB-2012 11:10:18  
Revision\_time = 8-FEB-2012 11:14:46  
Current\_time = 8-FEB-2012 11:16:29

Comment = single pulse decouple  
Data\_format = 1D COMPLEX  
Dim\_size = 26214  
Dim\_title = 13C  
Dim\_units = [ppm]  
Dimensions = X  
Site = ECX 400P  
Spectrometer = DELTA2\_NMR

Field\_strength = 9.389766[T] (400[MHz])  
X\_acq\_duration = 1.04333312[s]  
X\_domain = 13C  
X\_freq = 100.52530333[MHz]  
X\_offset = 100[ppm]  
X\_points = 32768  
X\_prescans = 2  
X\_resolution = 0.95846665[Hz]  
X\_sweep = 31.40703518[kHz]  
Irr\_domain = 1H  
Irr\_freq = 399.78219838[MHz]  
Irr\_offset = 5[ppm]  
Clipped = FALSE  
Mod\_return = 1  
Scans = 693  
Total\_scans = 693

X\_90\_width = 8.5[us]  
X\_acq\_time = 1.04333312[s]  
X\_angle = 30[deg]  
X\_atn = 3.6[db]  
X\_pulse = 2.83333333[us]  
Irr\_atn\_dec = 20.356[db]  
Irr\_atn\_noe = 20.356[db]  
Irr\_noise = WALTZ  
Decoupling = TRUE  
Initial\_wait = 1[s]  
Noe = TRUE  
Noe\_time = 3[s]  
Recvr\_gain = 46  
Relaxation\_delay = 3[s]  
Repetition\_time = 4.04333312[s]  
Temp\_get = 24.9[dc]

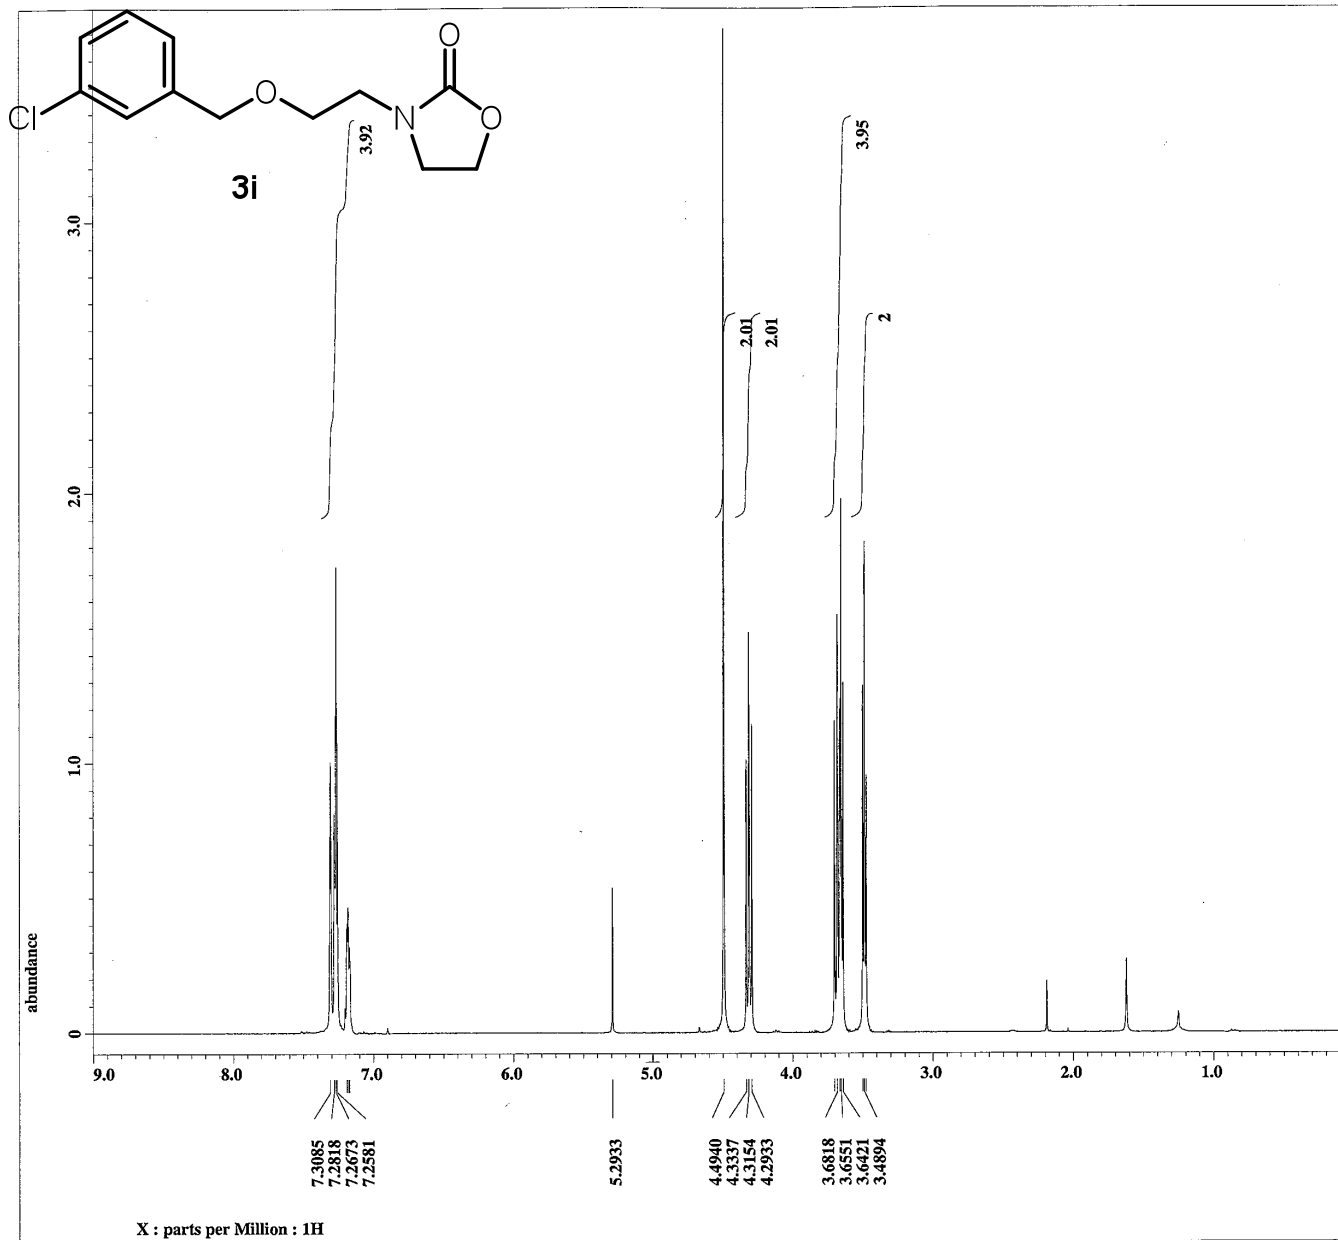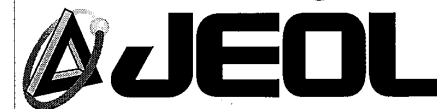

----- PROCESSING PARAMETERS -----  
dc\_balance : 0 : FALSE  
sexp : 0.2[Hz] : 0.0[s]  
trapezoid3 : 0[%] : 80[%] : 100[%]  
zerofill : 1  
fft : 1 : TRUE : TRUE  
machinephase  
ppm  
base\_correct : None : 0 : Smooth  
reference : 7.253[ppm] : 7.26[ppm]  
Derived from: 80-1447-2,r.t.,1H,CDC13-1.

Filename = 80-1447-2,r.t.,1H,CDC  
Author = delta  
Experiment = single\_pulse.ex2  
Sample\_id = 1  
Solvent = CHLOROFORM-D  
Creation\_time = 1-FEB-2012 15:14:27  
Revision\_time = 1-FEB-2012 15:21:01  
Current\_time = 1-FEB-2012 15:21:24

Comment = single\_pulse  
Data\_format = 1D REAL  
Dim\_size = 26214  
Dim\_title = 1H  
Dim\_units = [ppm]  
Dimensions = X  
Site = ECX 400P  
Spectrometer = DELTA2\_NMR

Field\_strength = 9.389766[T] (400[MHz])  
X\_acq\_duration = 3.2768[s]  
X\_domain = 1H  
X\_freq = 399.78219838[MHz]  
X\_offset = 5[ppm]  
X\_points = 32768  
X\_prescans = 0  
X\_resolution = 0.30517578[Hz]  
X\_sweep = 10[kHz]  
Irr\_domain = 1H  
Irr\_freq = 399.78219838[MHz]  
Irr\_offset = 5[ppm]  
Tri\_domain = 1H  
Tri\_freq = 399.78219838[MHz]  
Tri\_offset = 5[ppm]  
Clipped = FALSE  
Mod\_return = 1  
Scans = 8  
Total\_scans = 8

X\_90\_width = 13.2[us]  
X\_acq\_time = 3.2768[s]  
X\_angle = 45[deg]  
X\_atn = 2.1[dB]  
X\_pulse = 6.6[us]  
Irr\_mode = Off  
Tri\_mode = Off  
Dante\_preset = FALSE  
Initial\_wait = 1[s]  
Recvr\_gain = 42  
Relaxation\_delay = 2[s]  
Repetition\_time = 5.2768[s]  
Temp\_get = 25[dc]



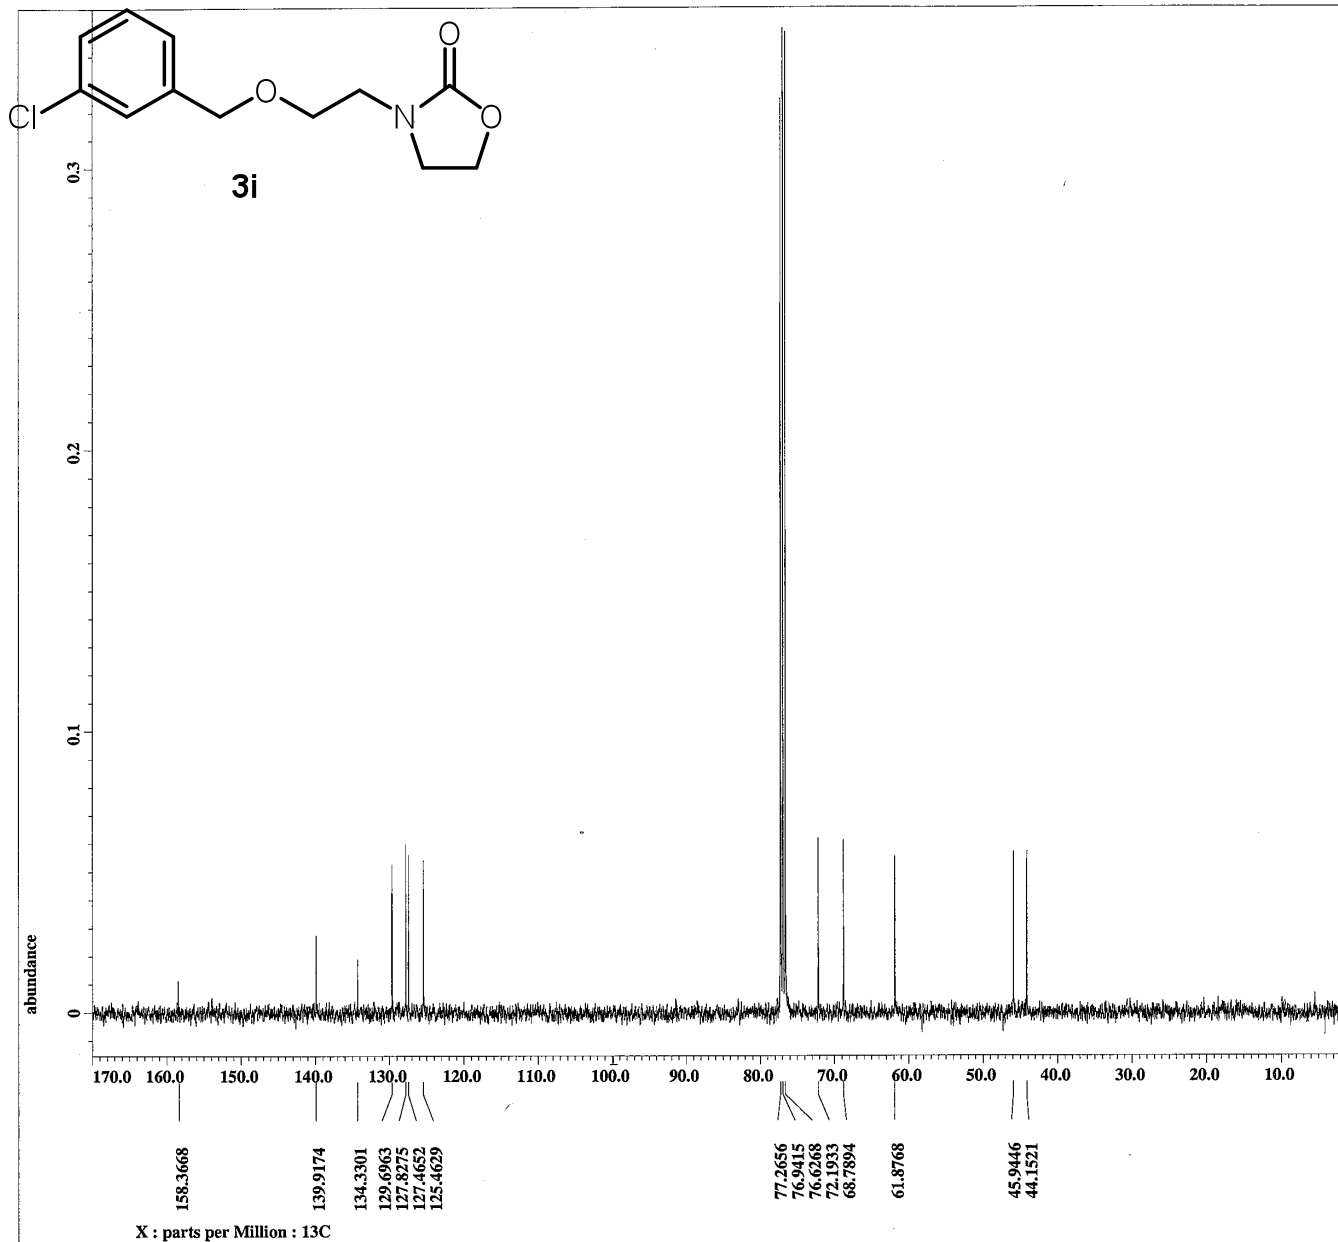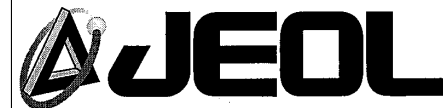

----- PROCESSING PARAMETERS -----  
 dc\_balance : 0 : FALSE  
 sexp : 2.0[Hz] : 0.0[s]  
 trapezoid3 : 0[%] : 80[%] : 100[%]  
 zerofill : 1  
 fft : 1 : TRUE : TRUE  
 machinephase  
 ppm  
 reference : 77.166[ppm] : 77[ppm]  
 Derived from: 80-1447,r.t.,13C,CDC13-1.j

Filename = 80-1447,r.t.,13C,CDC1  
 Author = delta  
 Experiment = single\_pulse\_dec  
 Sample\_id = 1  
 Solvent = CHLOROFORM-D  
 Creation\_time = 1-FEB-2012 15:51:50  
 Revision\_time = 1-FEB-2012 15:56:08  
 Current\_time = 1-FEB-2012 15:56:34

Comment = single pulse decouple  
 Data\_format = 1D\_COMPLEX  
 Dim\_size = 26214  
 Dim\_title = 13C  
 Dim\_units = [ppm]  
 Dimensions = X  
 Site = ECX 400P  
 Spectrometer = DELTA2\_NMR

Field\_strength = 9.389766[T] (400[MHz])  
 X\_acq\_duration = 1.0433312[s]  
 X\_domain = 13C  
 X\_freq = 100.52530333[MHz]  
 X\_offset = 100[ppm]  
 X\_points = 32768  
 X\_prescans = 2  
 X\_resolution = 0.95846665[Hz]  
 X\_sweep = 31.40703518[kHz]  
 Irr\_domain = 1H  
 Irr\_freq = 399.78219838[MHz]  
 Irr\_offset = 5[ppm]  
 Clipped = FALSE  
 Mod\_return = 1  
 Scans = 125  
 Total\_scans = 125

X\_90\_width = 8.5[us]  
 X\_acq\_time = 1.0433312[s]  
 X\_angle = 30[deg]  
 X\_atn = 3.6[dB]  
 X\_pulse = 2.83333333[us]  
 Irr\_atn\_dec = 20.356[dB]  
 Irr\_atn\_noe = 20.356[dB]  
 Irr\_noise = WALTZ  
 Decoupling = TRUE  
 Initial\_wait = 1[s]  
 Noe = TRUE  
 Noe\_time = 3[s]  
 Recvr\_gain = 50  
 Relaxation\_deley = 3[s]  
 Repetition\_time = 4.0433312[s]  
 Temp\_get = 25.3[degC]

Br

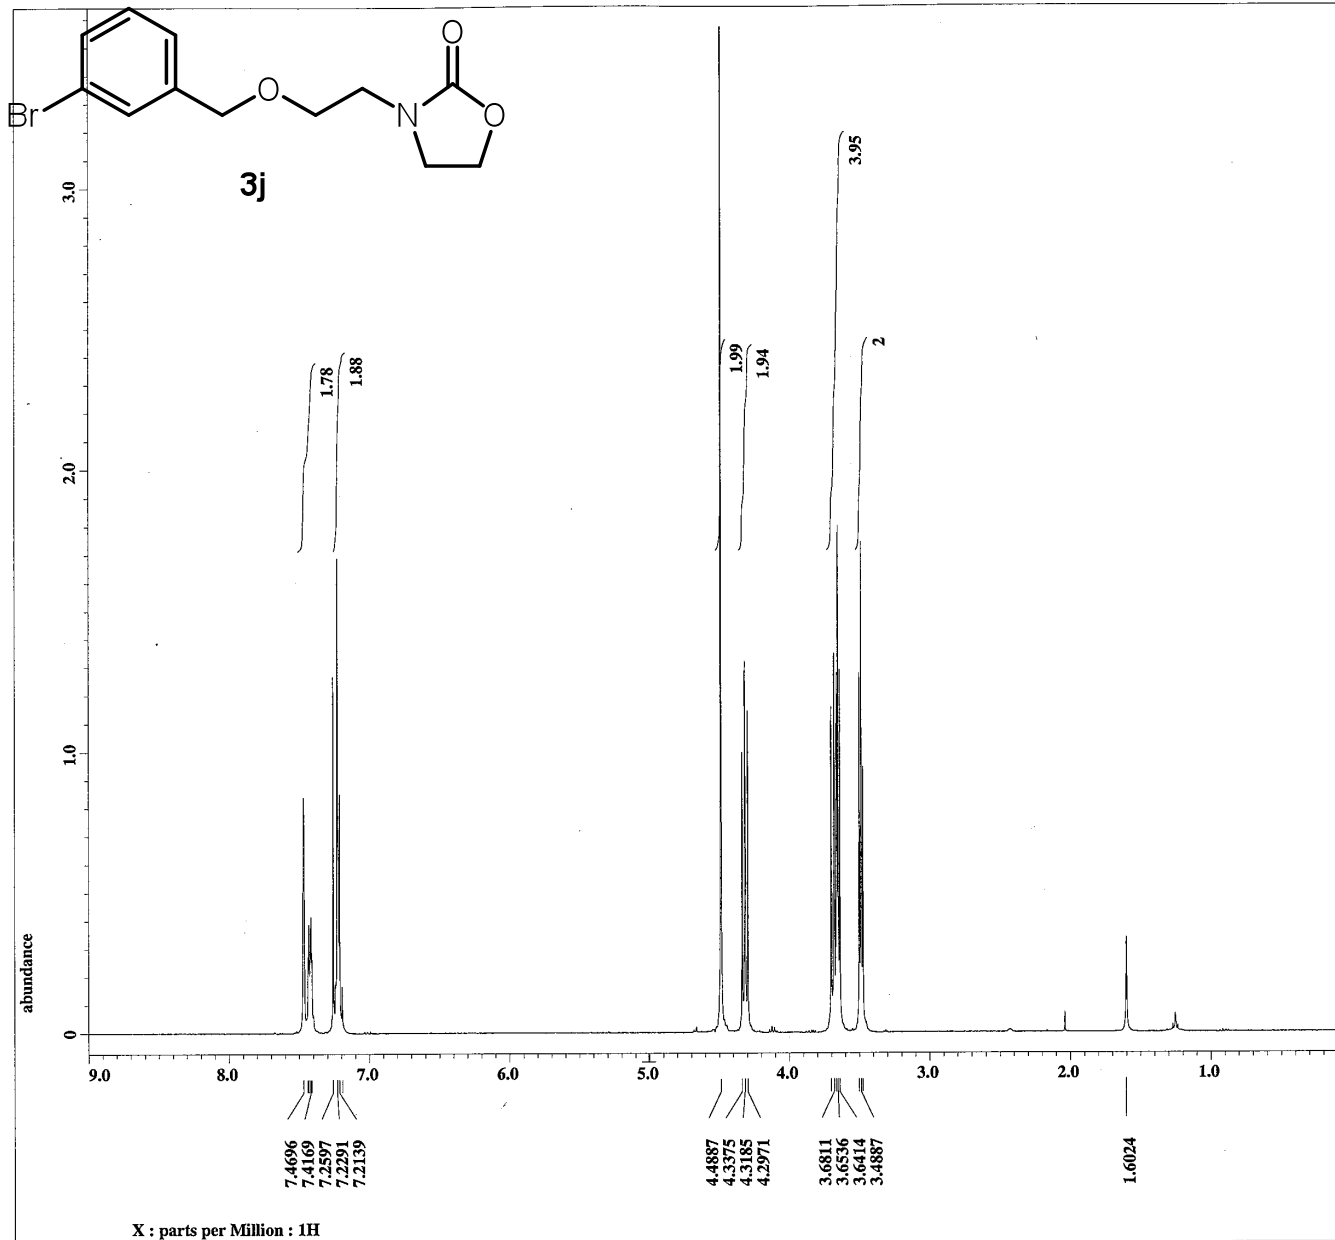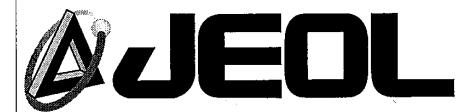

----- PROCESSING PARAMETERS -----  
dc\_balance : 0 : FALSE  
sexp : 0.2[Hz] : 0.0[s]  
trapezoid3 : 0[%] : 80[%] : 100[%]  
zerofill : 1  
fft : 1 : TRUE : TRUE  
machinephase  
ppm  
base\_correct : None : 0 : Smooth  
reference : 7.253[ppm] : 7.26[ppm]  
Derived from: 80-1449-2,r.t.,1H,CDC13-1.

Filename = 80-1449-2,r.t.,1H,CDC  
Author = delta  
Experiment = single\_pulse.ex2  
Sample\_id = 1  
Solvent = CHLOROFORM-D  
Creation\_time = 1-FEB-2012 15:09:37  
Revision\_time = 1-FEB-2012 15:16:01  
Current\_time = 1-FEB-2012 15:16:35

Comment = single\_pulse  
Data\_format = 1D REAL  
Dim\_size = 26214  
Dim\_title = 1H  
Dim\_units = [ppm]  
Dimensions = X  
Site = ECX 400P  
Spectrometer = DELTA2\_NMR

Field\_strength = 9.389766[T] (400[MHz])  
X\_acq\_duration = 3.2768[s]  
X\_domain = 1H  
X\_freq = 399.78219838[MHz]  
X\_offset = 5[ppm]  
X\_points = 32768  
X\_prescans = 0  
X\_resolution = 0.30517578[Hz]  
X\_sweep = 10[kHz]  
Irr\_domain = 1H  
Irr\_freq = 399.78219838[MHz]  
Irr\_offset = 5[ppm]  
Tri\_domain = 1H  
Tri\_freq = 399.78219838[MHz]  
Tri\_offset = 5[ppm]  
Clipped = FALSE  
Mod\_return = 1  
Scans = 8  
Total\_scans = 8

X\_90\_width = 13.2[us]  
X\_acq\_time = 3.2768[s]  
X\_angle = 45[deg]  
X\_atn = 2.1[dB]  
X\_pulse = 6.6[us]  
Irr\_mode = Off  
Tri\_mode = Off  
Dante\_preset = FALSE  
Initial\_wait = 1[s]  
Recvr\_gain = 44  
Relaxation\_delay = 2[s]  
Repetition\_time = 5.2768[s]  
Temp\_get = 24.9[dc]

3r

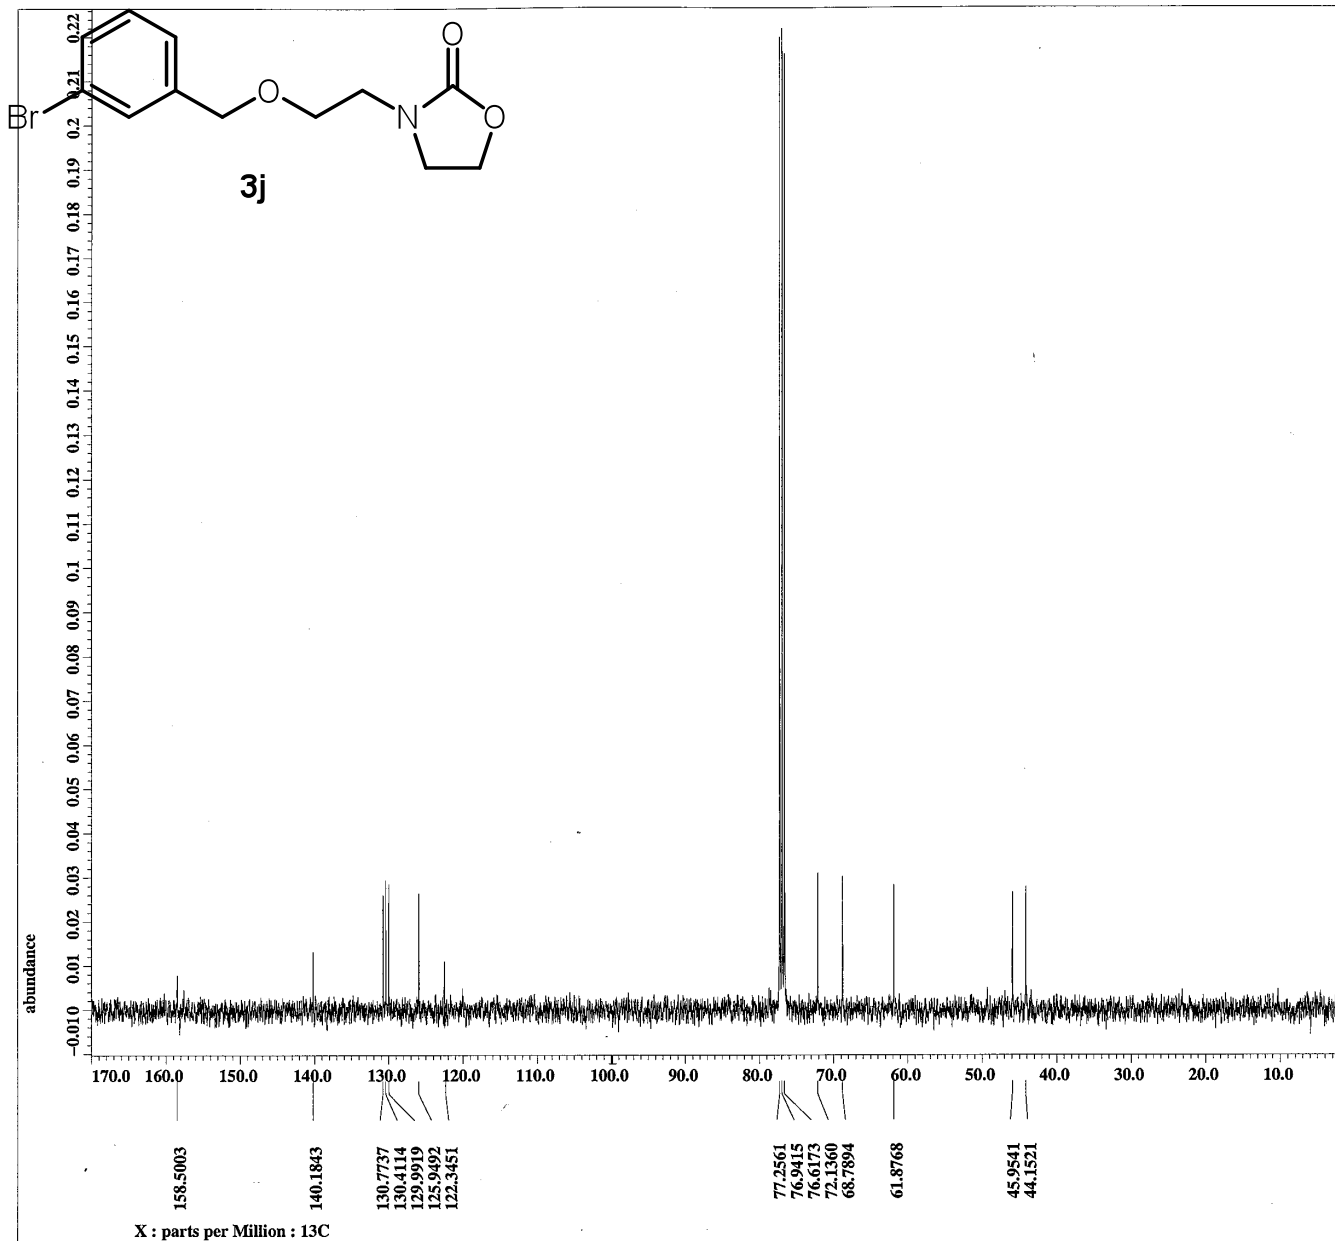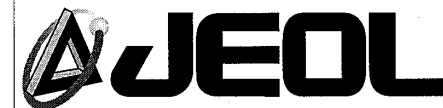

----- PROCESSING PARAMETERS -----  
dc\_balance : 0 : FALSE  
sexp : 2.0 [Hz] : 0.0 [s]  
trapezoid3 : 0 [%] : 80 [%] : 100 [%]  
zerofill : 1  
fft : 1 : TRUE : TRUE  
machinephase  
ppm  
reference : 77.166 [ppm] : 77 [ppm]  
Derived from: 80-1449,r.t.,13C,CDC13-1.j

Filename = 80-1449,r.t.,13C,CDC1  
Author = delta  
Experiment = single\_pulse\_dec  
Sample\_id = 1  
Solvent = CHLOROFORM-D  
Creation\_time = 1-FEB-2012 15:37:19  
Revision\_time = 1-FEB-2012 15:42:29  
Current\_time = 1-FEB-2012 15:43:31

Comment = single pulse decouple  
Data\_format = 1D COMPLEX  
Dim\_size = 26214  
Dim\_title = 13C  
Dim\_units = [ppm]  
Dimensions = X  
Site = ECX 400P  
Spectrometer = DELTA2\_NMR

Field\_strength = 9.389766 [T] (400 [MHz])  
X\_acq\_duration = 1.04333312 [s]  
X\_domain = 13C  
X\_freq = 100.52530333 [MHz]  
X\_offset = 100 [ppm]  
X\_points = 32768  
X\_prescans = 2  
X\_resolution = 0.95846665 [Hz]  
X\_sweep = 31.40703518 [kHz]  
Irr\_domain = 1H  
Irr\_freq = 399.78219838 [MHz]  
Irr\_offset = 5 [ppm]  
Clipped = FALSE  
Mod\_return = 1  
Scans = 60  
Total\_scans = 60

X\_90\_width = 8.5 [us]  
X\_acq\_time = 1.04333312 [s]  
X\_angle = 30 [deg]  
X\_atn = 3.6 [dB]  
X\_pulse = 2.83333333 [us]  
Irr\_atn\_dec = 20.356 [dB]  
Irr\_atn\_noe = 20.356 [dB]  
Irr\_noise = WALTZ  
Decoupling = TRUE  
Initial\_wait = 1 [s]  
Noe = TRUE  
Noe\_time = 3 [s]  
Recvr\_gain = 46  
Relaxation\_delay = 3 [s]  
Repetition\_time = 4.04333312 [s]  
Temp\_get = 25.2 [dC]

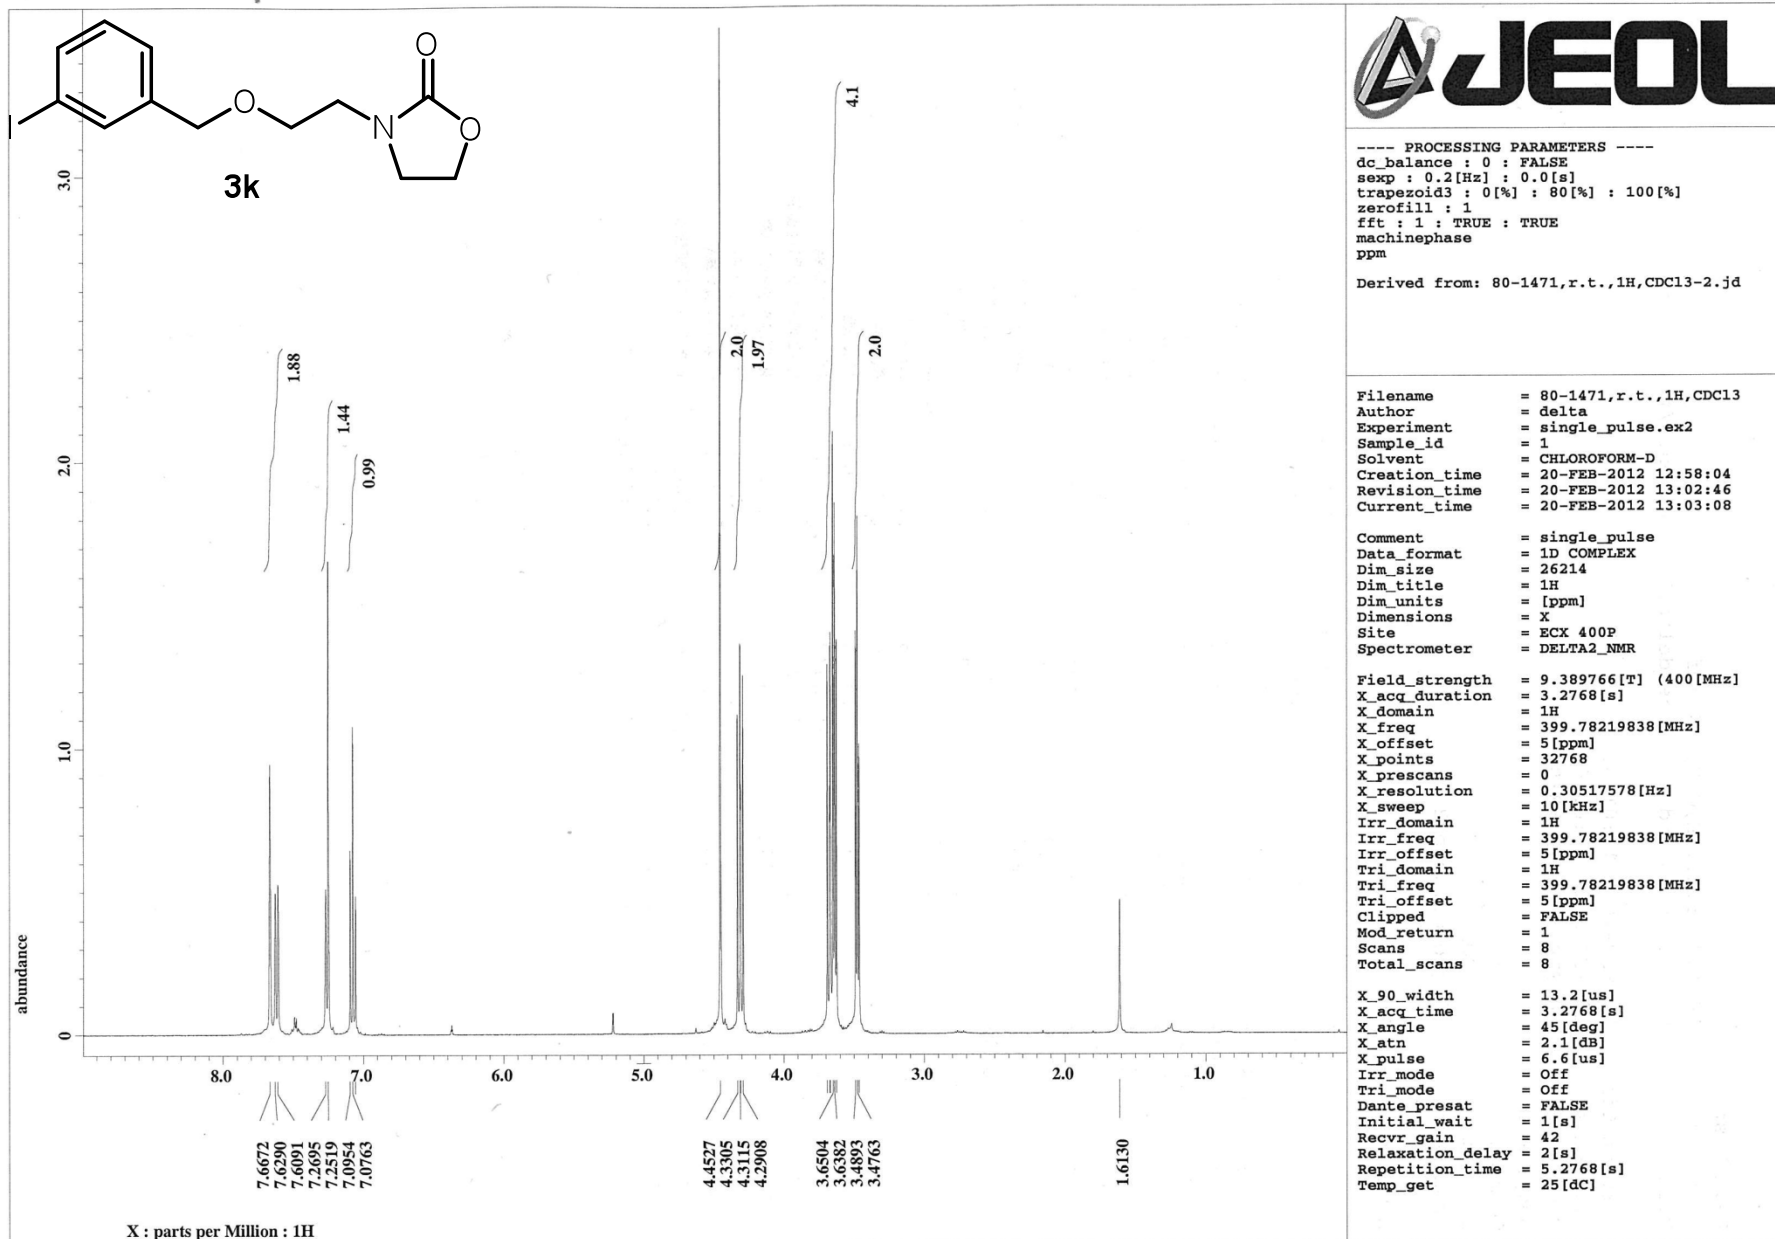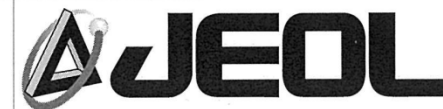

----- PROCESSING PARAMETERS -----  
 dc\_balance : 0 : FALSE  
 secp : 0.2[Hz] : 0.0[s]  
 trapezoid3 : 0[%] : 80[%] : 100[%]  
 zerofill : 1  
 fft : 1 : TRUE : TRUE  
 machinephase  
 ppm  
 Derived from: 80-1471,r.t.,1H,CDC13-2.jd

Filename = 80-1471,r.t.,1H,CDC13  
 Author = delta  
 Experiment = single\_pulse.ex2  
 Sample\_id = 1  
 Solvent = CHLOROFORM-D  
 Creation\_time = 20-FEB-2012 12:58:04  
 Revision\_time = 20-FEB-2012 13:02:46  
 Current\_time = 20-FEB-2012 13:03:08

Comment = single\_pulse  
 Data\_format = 1D COMPLEX  
 Dim\_size = 26214  
 Dim\_title = 1H  
 Dim\_units = [ppm]  
 Dimensions = X  
 Site = ECX 400P  
 Spectrometer = DELTA2\_NMR

Field\_strength = 9.389766[T] (400[MHz])  
 X\_acq\_duration = 3.2768[s]  
 X\_domain = 1H  
 X\_freq = 399.78219838[MHz]  
 X\_offset = 5[ppm]  
 X\_points = 32768  
 X\_prescans = 0  
 X\_resolution = 0.30517578[Hz]  
 X\_sweep = 10[kHz]  
 Irr\_domain = 1H  
 Irr\_freq = 399.78219838[MHz]  
 Irr\_offset = 5[ppm]  
 Tri\_domain = 1H  
 Tri\_freq = 399.78219838[MHz]  
 Tri\_offset = 5[ppm]  
 Clipped = FALSE  
 Mod\_return = 1  
 Scans = 8  
 Total\_scans = 8

X\_90\_width = 13.2[us]  
 X\_acq\_time = 3.2768[s]  
 X\_angle = 45[deg]  
 X\_atn = 2.1[dB]  
 X\_pulse = 6.6[us]  
 Irr\_mode = Off  
 Tri\_mode = Off  
 Dante\_presat = FALSE  
 Initial\_wait = 1[s]  
 Recvr\_gain = 42  
 Relaxation\_delay = 2[s]  
 Repetition\_time = 5.2768[s]  
 Temp\_get = 25[dc]

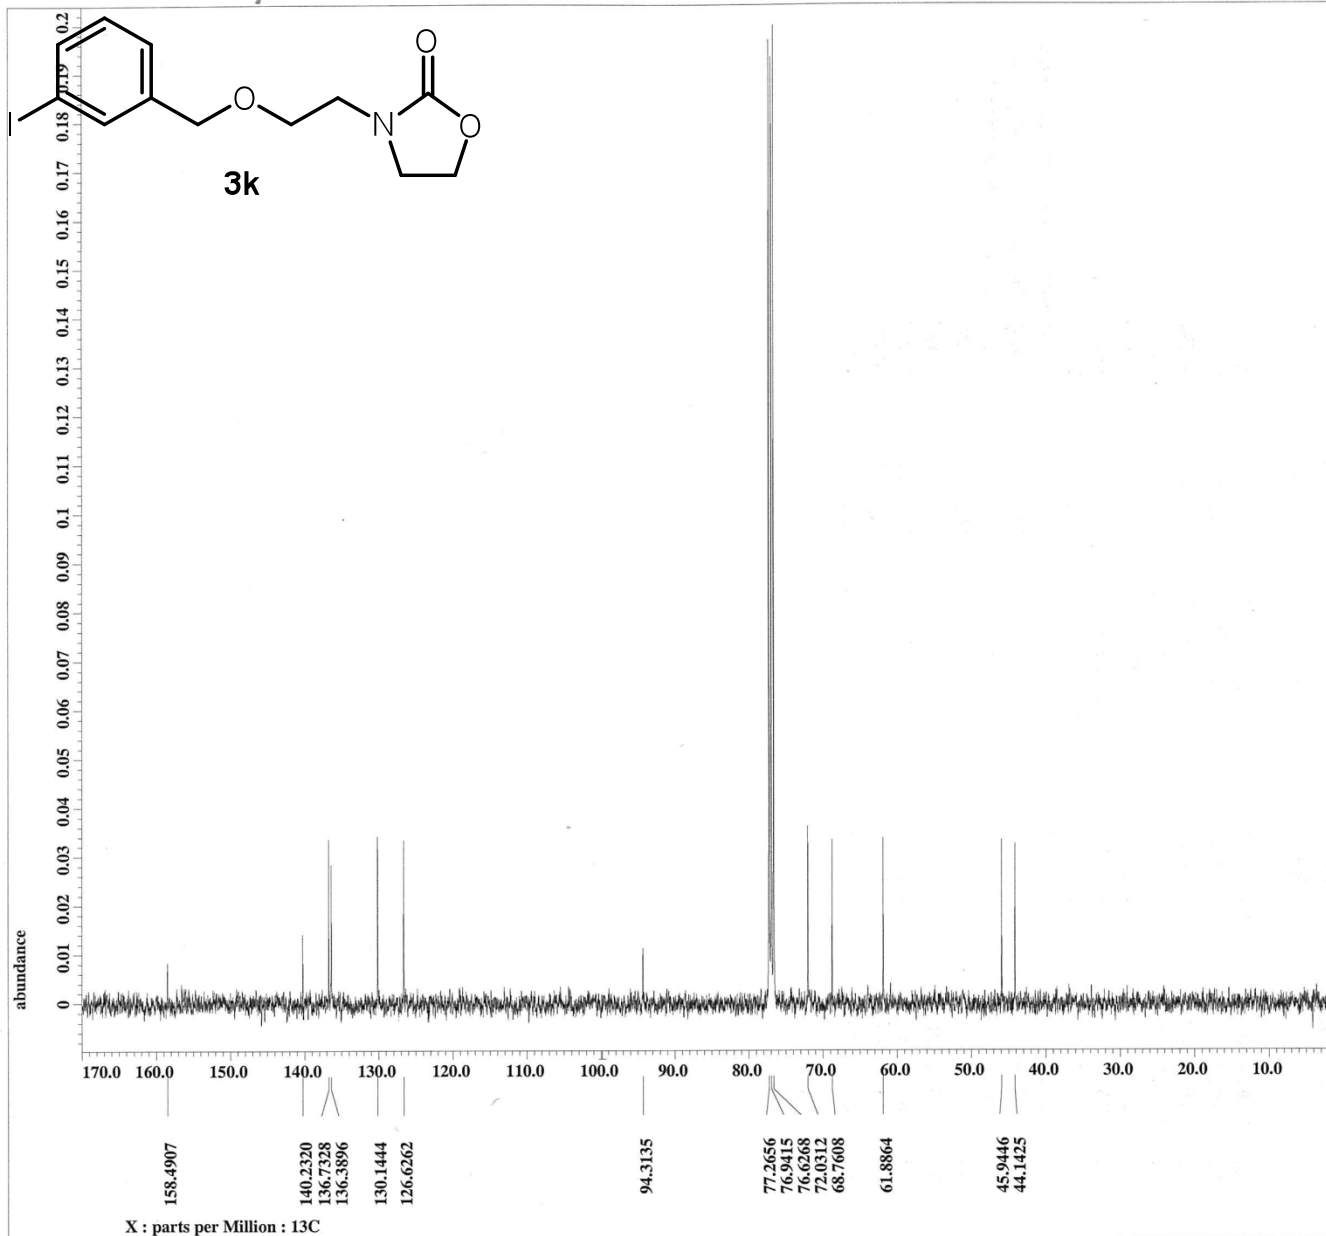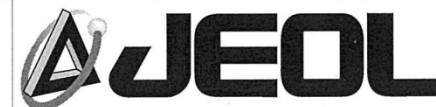

----- PROCESSING PARAMETERS -----  
dc\_balance : 0 : FALSE  
sexp : 2.0 [Hz] : 0.0 [s]  
trapezoid3 : 0 [%] : 80 [%] : 100 [%]  
zerofill : 1  
fft : 1 : TRUE : TRUE  
machinephase  
ppm  
reference : 77.166 [ppm] : 77 [ppm]  
Derived from: 80-1471,r.t.,13C,CDCl3-1.j

Filename = 80-1471,r.t.,13C,CDCl  
Author = delta  
Experiment = single\_pulse\_dec  
Sample\_id = 1  
Solvent = CHLOROFORM-D  
Creation\_time = 20-FEB-2012 13:09:04  
Revision\_time = 20-FEB-2012 13:13:08  
Current\_time = 20-FEB-2012 13:13:39

Comment = single pulse decouple  
Data\_format = 1D COMPLEX  
Dim\_size = 26214  
Dim\_title = 13C  
Dim\_units = [ppm]  
Dimensions = X  
Site = ECX 400P  
Spectrometer = DELTA2\_NMR

Field\_strength = 9.389766 [T] (400 [MHz])  
X\_acq\_duration = 1.0433312 [s]  
X\_domain = 13C  
X\_freq = 100.52530333 [MHz]  
X\_offset = 100 [ppm]  
X\_points = 32768  
X\_prescans = 2  
X\_resolution = 0.95846665 [Hz]  
X\_sweep = 31.40703518 [kHz]  
Irr\_domain = 1H  
Irr\_freq = 399.78219838 [MHz]  
Irr\_offset = 5 [ppm]  
Clipped = FALSE  
Mod\_return = 1  
Scans = 98  
Total\_scans = 98

X\_90\_width = 8.5 [us]  
X\_acq\_time = 1.0433312 [s]  
X\_angle = 30 [deg]  
X\_atn = 3.6 [dB]  
X\_pulse = 2.83333333 [us]  
Irr\_atn\_dec = 20.356 [dB]  
Irr\_atn\_noe = 20.356 [dB]  
Irr\_noise = WALTZ  
Decoupling = TRUE  
Initial\_wait = 1 [s]  
Noe = TRUE  
Noe\_time = 3 [s]  
Recvr\_gain = 46  
Relaxation\_delay = 3 [s]  
Repetition\_time = 4.0433312 [s]  
Temp\_get = 25.3 [dC]

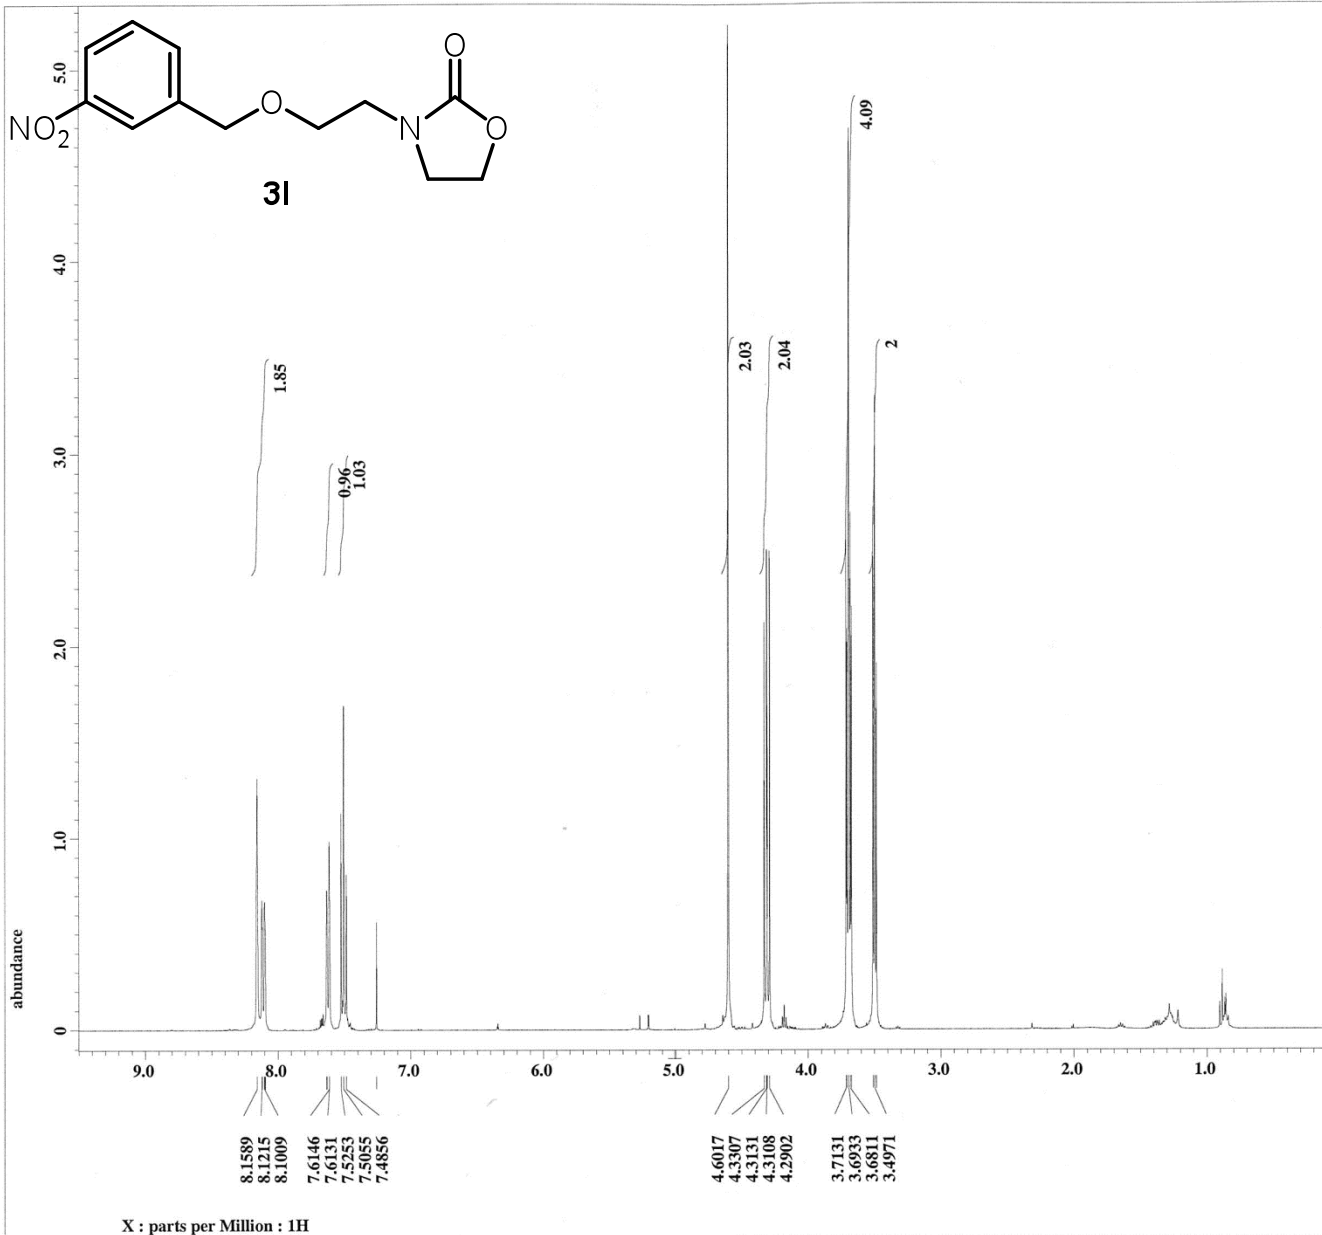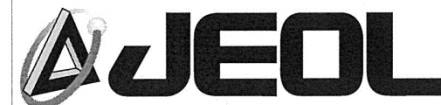

---- PROCESSING PARAMETERS ----  
 dc\_balance : 0 : FALSE  
 secp : 0.2[Hz] : 0.0[s]  
 trapezoid3 : 0[%] : 80[%] : 100[%]  
 zerofill : 1  
 fft : 1 : TRUE : TRUE  
 machinephase  
 ppm  
 base\_correct : None : 0 : Smooth  
 reference : 7.253[ppm] : 7.26[ppm]  
 Derived from: 80-NO2,r.t.,1H,CDCl3-2.jdf

Filename = 80-NO2,r.t.,1H,CDCl3-  
 Author = delta  
 Experiment = single\_pulse.ex2  
 Sample\_id = 1  
 Solvent = CHLOROFORM-D  
 Creation\_time = 6-FEB-2012 11:03:30  
 Revision\_time = 6-FEB-2012 11:09:02  
 Current\_time = 6-FEB-2012 11:09:32

Comment = single\_pulse  
 Data\_format = 1D REAL  
 Dim\_size = 26214  
 Dim\_title = 1H  
 Dim\_units = [ppm]  
 Dimensions = X  
 Site = ECX 400P  
 Spectrometer = DELTA2\_NMR

Field\_strength = 9.389766[T] (400[MHz])  
 X\_acq\_duration = 3.2768[s]  
 X\_domain = 1H  
 X\_freq = 399.78219838[MHz]  
 X\_offset = 5[ppm]  
 X\_points = 32768  
 X\_prescans = 0  
 X\_resolution = 0.30517578[Hz]  
 X\_sweep = 10[kHz]  
 Irr\_domain = 1H  
 Irr\_freq = 399.78219838[MHz]  
 Irr\_offset = 5[ppm]  
 Tri\_domain = 1H  
 Tri\_freq = 399.78219838[MHz]  
 Tri\_offset = 5[ppm]  
 Clipped = FALSE  
 Mod\_return = 1  
 Scans = 8  
 Total\_scans = 8

X\_90\_width = 13.2[us]  
 X\_acq\_time = 3.2768[s]  
 X\_angle = 45[deg]  
 X\_atn = 2.1[dB]  
 X\_pulse = 6.6[us]  
 Irr\_mode = Off  
 Tri\_mode = Off  
 Dante\_presat = FALSE  
 Initial\_wait = 1[s]  
 Recvr\_gain = 32  
 Relaxation\_delay = 2[s]  
 Repetition\_time = 5.2768[s]  
 Temp\_get = 24.7[dc]

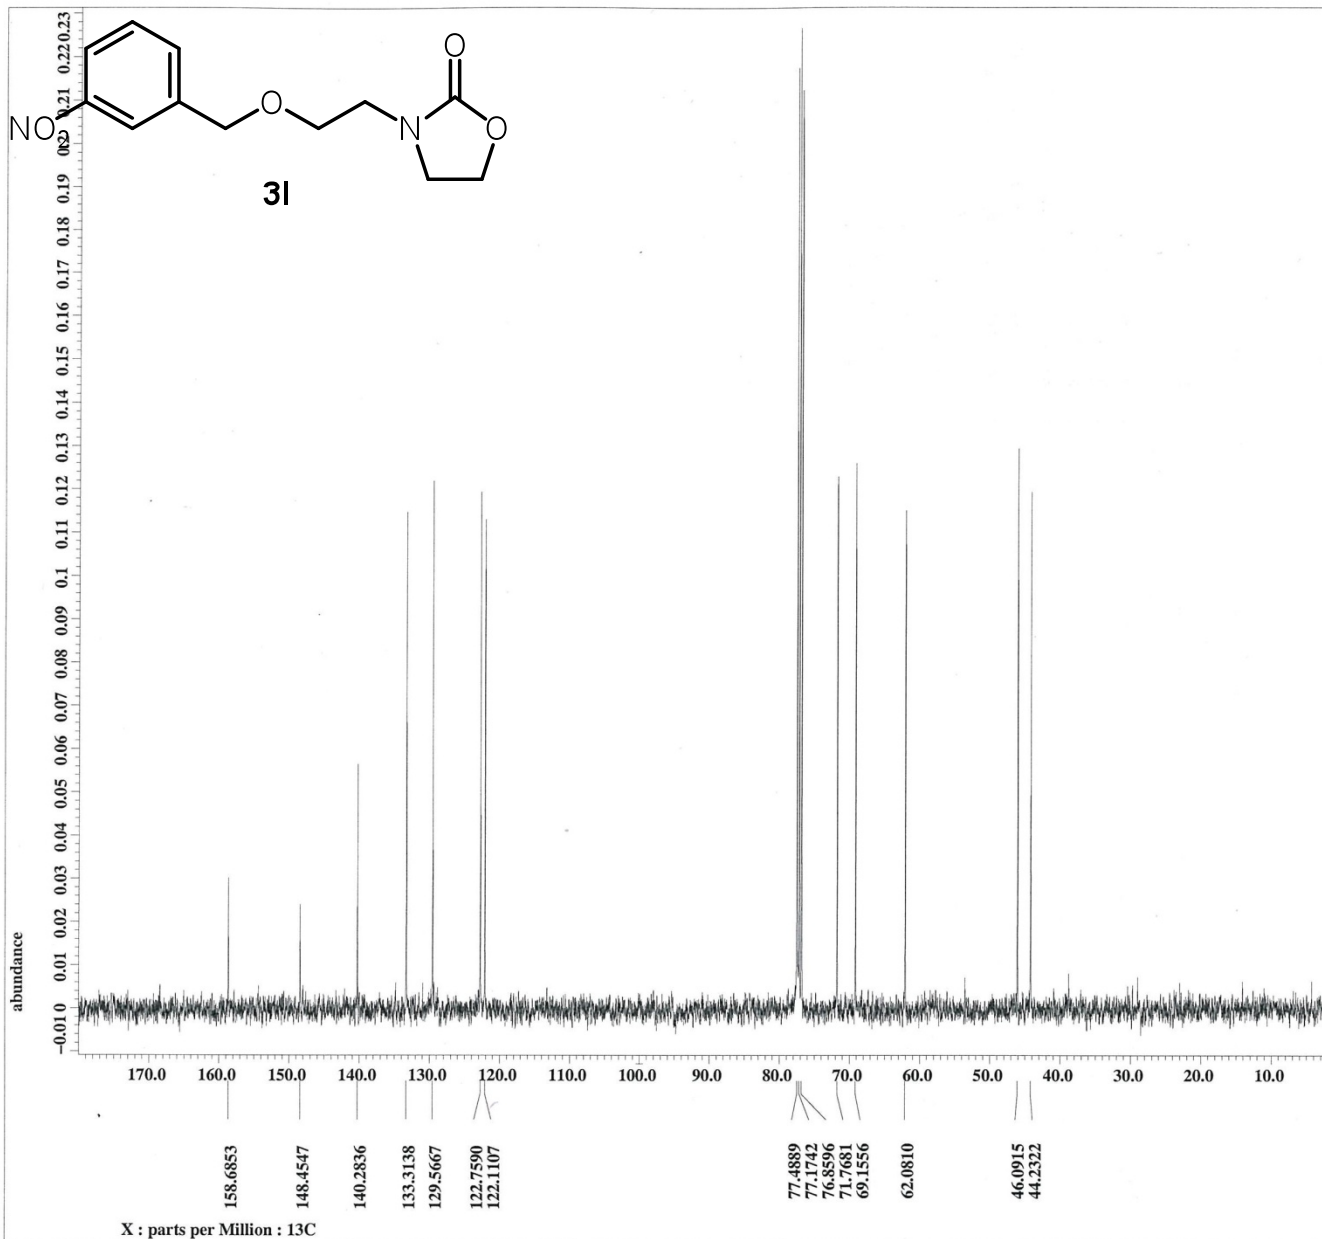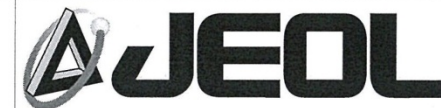

---- PROCESSING PARAMETERS ----  
dc\_balance : 0 : FALSE  
sexp : 2.0[Hz] : 0.0[s]  
trapezoid3 : 0[%] : 80[%] : 100[%]  
zerofill : 1  
fft : 1 : TRUE : TRUE  
machinephase  
ppm  
Derived from: 80-NO2,r.t.,13C,CDC13-2.jd

Filename = 80-NO2,r.t.,13C,CDC13  
Author = delta  
Experiment = single\_pulse\_dec  
Sample\_id = 1  
Solvent = CHLOROFORM-D  
Creation\_time = 3-FEB-2012 10:46:43  
Revision\_time = 3-FEB-2012 10:50:48  
Current\_time = 3-FEB-2012 10:51:18

Comment = single\_pulse decouple  
Data\_format = 1D COMPLEX  
Dim\_size = 26214  
Dim\_title = 13C  
Dim\_units = [ppm]  
Dimensions = X  
Site = ECX 400P  
Spectrometer = DELTA2\_NMR

Field\_strength = 9.389766[T] (400[MHz])  
X\_acq\_duration = 1.04333312[s]  
X\_domain = 13C  
X\_freq = 100.52530333[MHz]  
X\_offset = 100[ppm]  
X\_points = 32768  
X\_prescans = 2  
X\_resolution = 0.95846665[Hz]  
X\_sweep = 31.40703518[kHz]  
Irr\_domain = 1H  
Irr\_freq = 399.78219838[MHz]  
Irr\_offset = 5[ppm]  
Clipped = FALSE  
Mod\_return = 1  
Scans = 51  
Total\_scans = 51

X\_90\_width = 8.5[us]  
X\_acq\_time = 1.04333312[s]  
X\_angle = 30[deg]  
X\_atn = 3.6[db]  
X\_pulse = 2.83333333[us]  
Irr\_atn\_dec = 20.356[db]  
Irr\_atn\_noe = 20.356[db]  
Irr\_noise = WALZ  
Decoupling = TRUE  
Initial\_wait = 1[s]  
Noe = TRUE  
Noe\_time = 3[s]  
Recvr\_gain = 46  
Relaxation\_delay = 3[s]  
Repetition\_time = 4.04333312[s]  
Temp\_get = 24.9[dc]

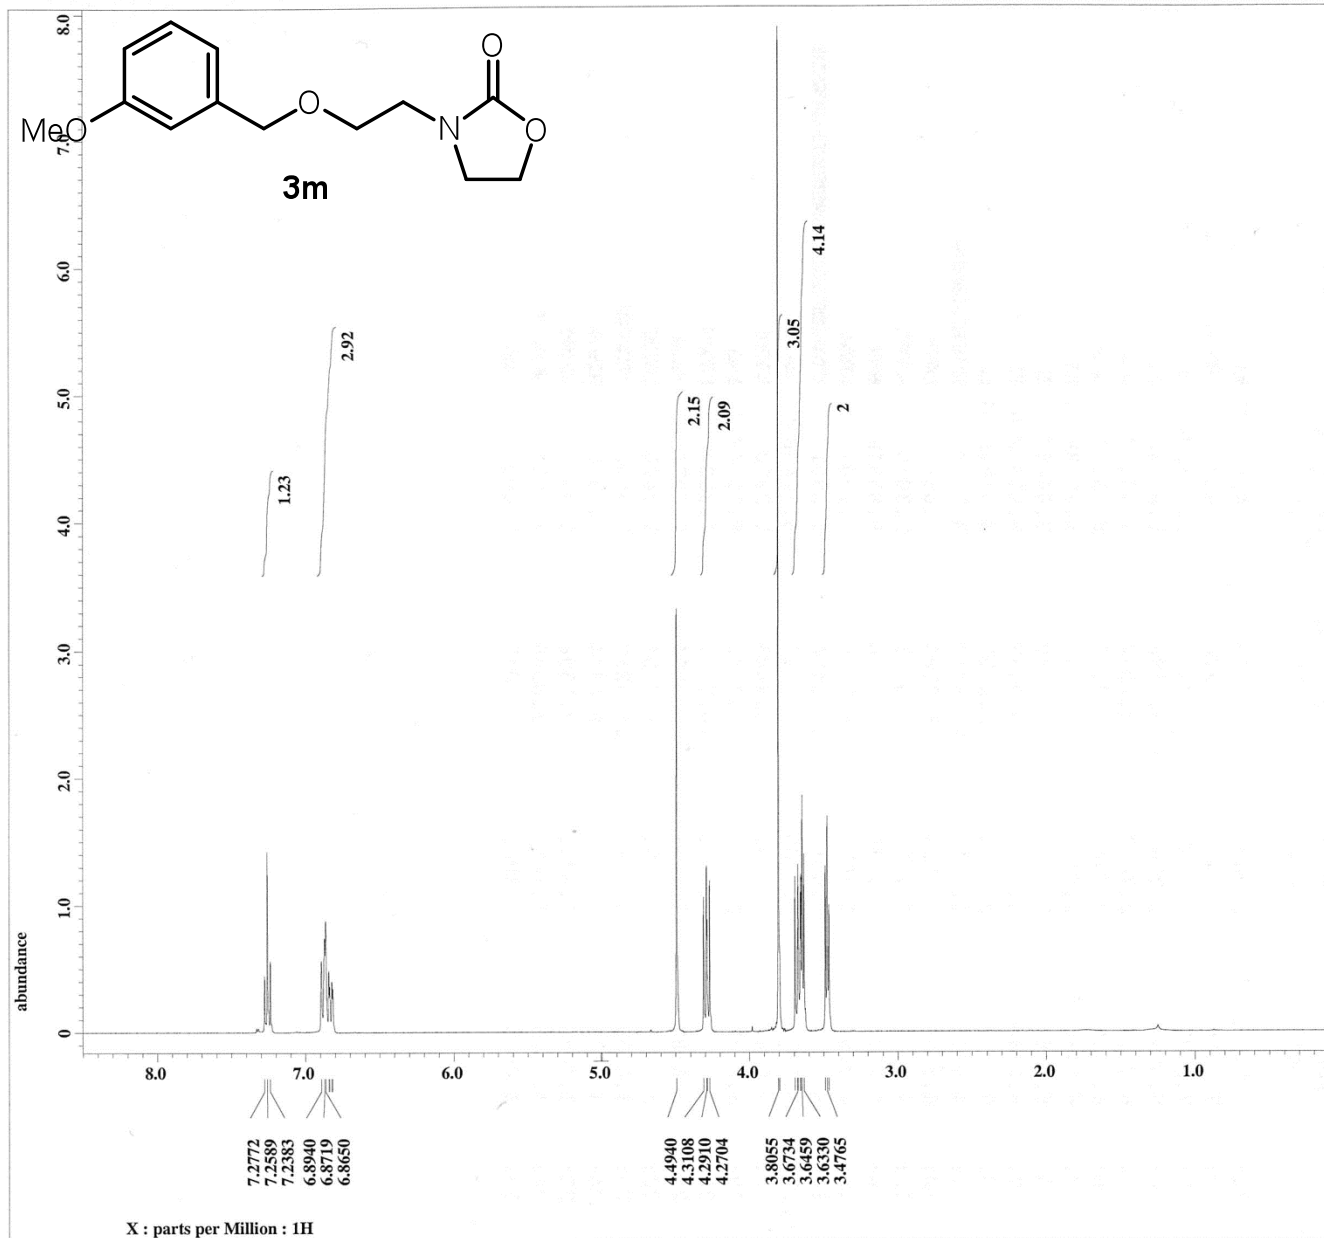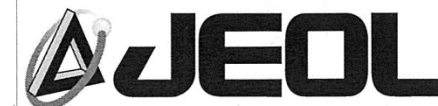

---- PROCESSING PARAMETERS ----  
dc\_balance : 0 : FALSE  
sexp : 0.2 [Hz] : 0.0 [s]  
trapezoid3 : 0 [%] : 80 [%] : 100 [%]  
zerofill : 1  
fft : 1 : TRUE : TRUE  
machinephase  
ppm  
base\_correct : None : 0 : Smooth  
reference : 7.253 [ppm] : 7.26 [ppm]  
Derived from: 80-1457,r.t.,1H,CDC13-2.jd

Filename = 80-1457,r.t.,1H,CDC13  
Author = delta  
Experiment = single\_pulse.ex2  
Sample\_id = 1  
Solvent = CHLOROFORM-D  
Creation\_time = 9-FEB-2012 16:04:33  
Revision\_time = 9-FEB-2012 16:09:59  
Current\_time = 9-FEB-2012 16:10:22

Comment = single\_pulse  
Data\_format = 1D REAL  
Dim\_size = 26214  
Dim\_title = 1H  
Dim\_units = [ppm]  
Dimensions = X  
Site = ECX 400P  
Spectrometer = DELTA2\_NMR

Field\_strength = 9.389766 [T] (400 [MHz])  
X\_acq\_duration = 3.2768 [s]  
X\_domain = 1H  
X\_freq = 399.78219838 [MHz]  
X\_offset = 5 [ppm]  
X\_points = 32768  
X\_prescans = 0  
X\_resolution = 0.30517578 [Hz]  
X\_sweep = 10 [kHz]  
Irr\_domain = 1H  
Irr\_freq = 399.78219838 [MHz]  
Irr\_offset = 5 [ppm]  
Tri\_domain = 1H  
Tri\_freq = 399.78219838 [MHz]  
Tri\_offset = 5 [ppm]  
Clipped = FALSE  
Mod\_return = 1  
Scans = 8  
Total\_scans = 8

X\_90\_width = 13.2 [us]  
X\_acq\_time = 3.2768 [s]  
X\_angle = 45 [deg]  
X\_atn = 2.1 [dB]  
X\_pulse = 6.6 [us]  
Irr\_mode = Off  
Tri\_mode = Off  
Dante\_presat = FALSE  
Initial\_wait = 1 [s]  
Recvr\_gain = 36  
Relaxation\_delay = 2 [s]  
Repetition\_time = 5.2768 [s]  
Temp\_get = 24.4 [dC]



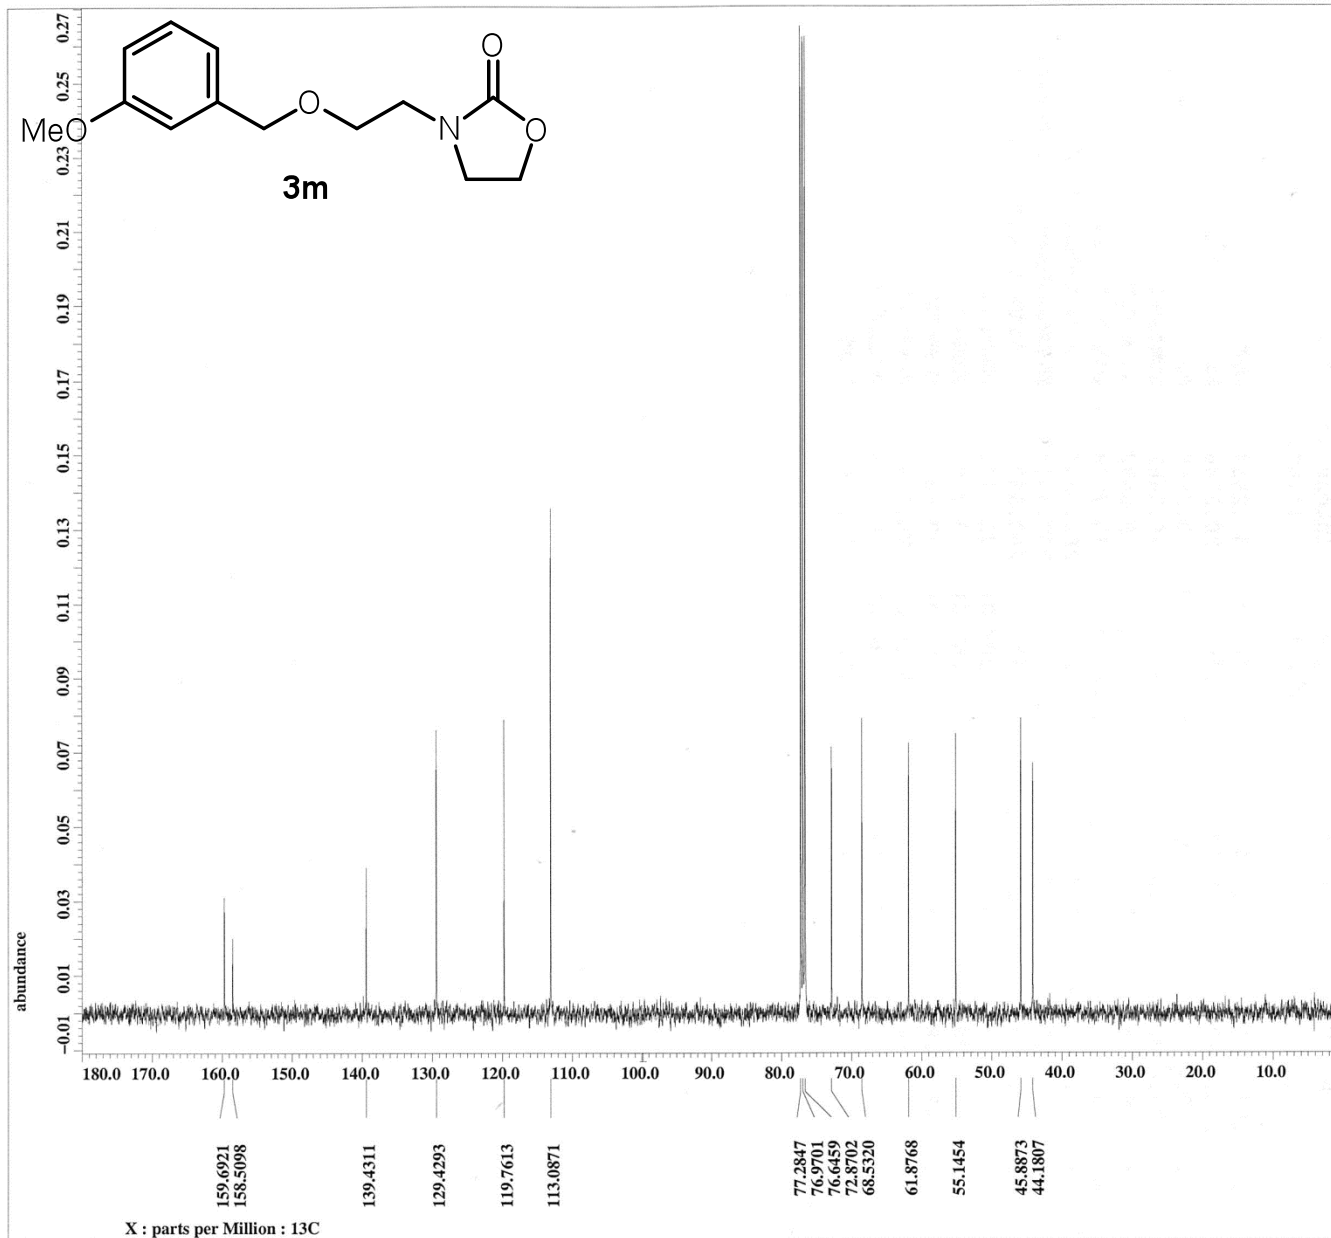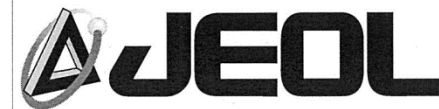

---- PROCESSING PARAMETERS ----  
dc\_balance : 0 : FALSE  
sexp : 2.0[Hz] : 0.0[s]  
trapezoid3 : 0[%] : 80[%] : 100[%]  
zerofill : 1  
fft : 1 : TRUE : TRUE  
machinephase  
ppm  
reference : 77.166[ppm] : 77[ppm]  
Derived from: 80-1457,r.t.,13C,CDC13-1.j

Filename = 80-1457,r.t.,13C,CDC1  
Author = delta  
Experiment = single\_pulse\_dec  
Sample\_id = 1  
Solvent = CHLOROFORM-D  
Creation\_time = 9-FEB-2012 16:15:32  
Revision\_time = 9-FEB-2012 16:20:43  
Current\_time = 9-FEB-2012 16:21:10

Comment = single pulse decouple  
Data\_format = 1D COMPLEX  
Dim\_size = 26214  
Dim\_title = 13C  
Dim\_units = [ppm]  
Dimensions = X  
Site = ECX 400P  
Spectrometer = DELTA2\_NMR

Field\_strength = 9.389766[T] (400[MHz])  
X\_acq\_duration = 1.04333312[s]  
X\_domain = 13C  
X\_freq = 100.52530333[MHz]  
X\_offset = 100[ppm]  
X\_points = 32768  
X\_prescans = 2  
X\_resolution = 0.95846665[Hz]  
X\_sweep = 31.40703518[kHz]  
Irr\_domain = 1H  
Irr\_freq = 399.78219838[MHz]  
Irr\_offset = 5[ppm]  
Clipped = FALSE  
Mod\_return = 1  
Scans = 99  
Total\_scans = 99

X\_90\_width = 8.5[us]  
X\_acq\_time = 1.04333312[s]  
X\_angle = 30[deg]  
X\_atn = 3.6[dB]  
X\_pulse = 2.83333333[us]  
Irr\_atn\_dec = 20.356[dB]  
Irr\_atn\_noe = 20.356[dB]  
Irr\_noise = WALTZ  
Decoupling = TRUE  
Initial\_wait = 1[s]  
Noe = TRUE  
Noe\_time = 3[s]  
Recvr\_gain = 48  
Relaxation\_delay = 3[s]  
Repetition\_time = 4.04333312[s]  
Temp\_get = 24.7[dC]

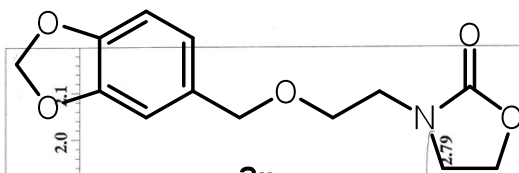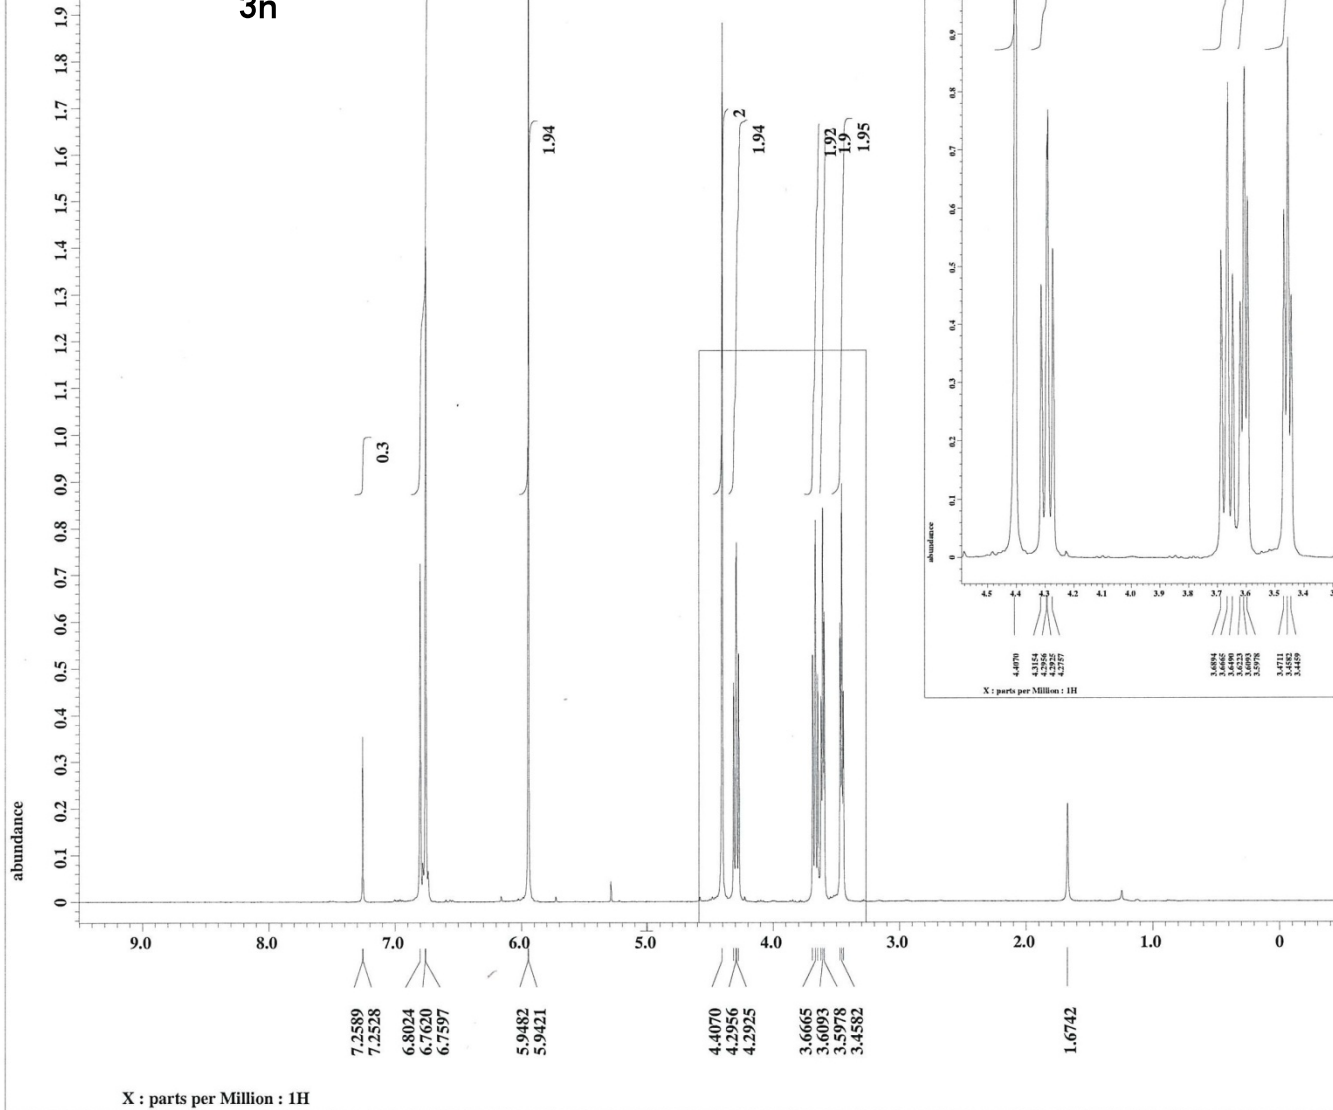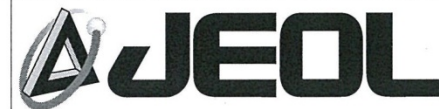

----- PROCESSING PARAMETERS -----  
dc\_balance : 0 : FALSE  
sexp : 0.2[Hz] : 0.0[s]  
trapezoid3 : 0[%] : 80[%] : 100[%]  
zerofill : 1  
fft : 1 : TRUE : TRUE  
machinephase  
ppm  
base\_correct : None : 0 : Smooth  
reference : 7.253[ppm] : 7.26[ppm]  
Derived from: 80-ac,r.t.,1H,CDC13-1.jdf

Filename = 80-ac,r.t.,1H,CDC13-5  
Author = delta  
Experiment = single\_pulse.ex2  
Sample\_id = 1  
Solvent = CHLOROFORM-D  
Creation\_time = 19-DEC-2011 10:18:52  
Revision\_time = 19-DEC-2011 10:22:35  
Current\_time = 19-DEC-2011 10:25:24

Comment = single\_pulse  
Data\_format = 1D\_REAL  
Dim\_size = 26214  
Dim\_title = 1H  
Dim\_units = [ppm]  
Dimensions = X  
Site = ECX 400P  
Spectrometer = DELTA2\_NMR

Field\_strength = 9.389766[T] (400[MHz])  
X\_acq\_duration = 3.2768[s]  
X\_domain = 1H  
X\_freq = 399.78219838[MHz]  
X\_offset = 5[ppm]  
X\_points = 32768  
X\_prescans = 0  
X\_resolution = 0.30517578[Hz]  
X\_sweep = 10[kHz]  
Irr\_domain = 1H  
Irr\_freq = 399.78219838[MHz]  
Irr\_offset = 5[ppm]  
Tri\_domain = 1H  
Tri\_freq = 399.78219838[MHz]  
Tri\_offset = 5[ppm]  
Clipped = FALSE  
Mod\_return = 1  
Scans = 16  
Total\_scans = 16

X\_90\_width = 14[us]  
X\_acq\_time = 3.2768[s]  
X\_angle = 45[deg]  
X\_atn = 2.1[dB]  
X\_pulse = 7[us]  
Irr\_mode = Off  
Tri\_mode = Off  
Dante\_presat = FALSE  
Initial\_wait = 1[s]  
Recvr\_gain = 36  
Relaxation\_delay = 2[s]  
Repetition\_time = 5.2768[s]  
Temp\_get = 403.1[degC]

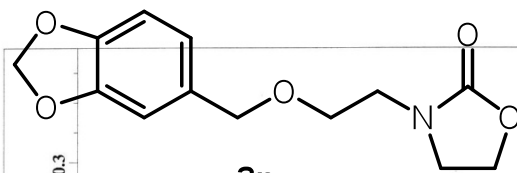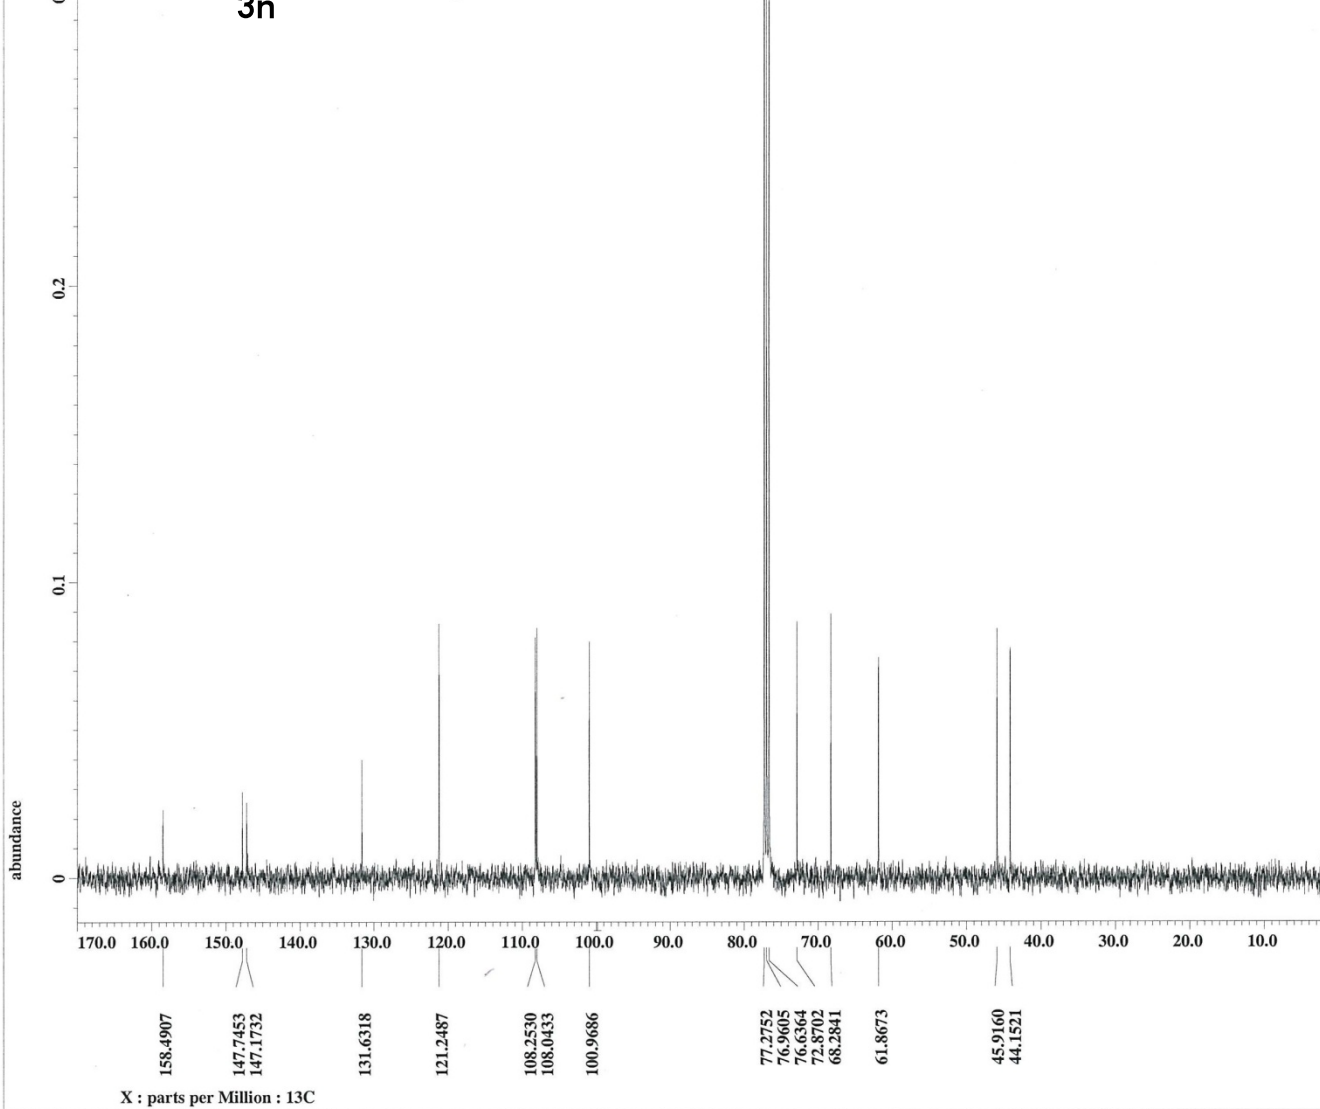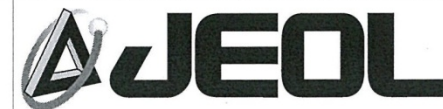

---- PROCESSING PARAMETERS ----  
dc\_balance : 0 : FALSE  
sexp : 2.0 [Hz] : 0.0 [s]  
trapezoid3 : 0 [%] : 80 [%] : 100 [%]  
zerofill : 1  
fft : 1 : TRUE : TRUE  
machinephase  
ppm  
reference : 77.166 [ppm] : 77 [ppm]  
Derived from: 80-ac,13C, r.t., CDC13-1.j

Filename = 80-ac,13C, r.t., CDC1  
Author = delta  
Experiment = single\_pulse\_dec  
Sample\_id = 1  
Solvent = CHLOROFORM-D  
Creation\_time = 19-DEC-2011 10:33:04  
Revision\_time = 19-DEC-2011 10:32:53  
Current\_time = 19-DEC-2011 10:33:25

Comment = single pulse decouple  
Data\_format = 1D COMPLEX  
Dim\_size = 26214  
Dim\_title = 13C  
Dim\_units = [ppm]  
Dimensions = X  
Site = ECX 400P  
Spectrometer = DELTA2\_NMR

Field\_strength = 9.389766 [T] (400 [MHz])  
X\_acq\_duration = 1.04333312 [s]  
X\_domain = 13C  
X\_freq = 100.52530333 [MHz]  
X\_offset = 100 [ppm]  
X\_points = 32768  
X\_prescans = 2  
X\_resolution = 0.95846665 [Hz]  
X\_sweep = 31.40703518 [kHz]  
Irr\_domain = 1H  
Irr\_freq = 399.78219838 [MHz]  
Irr\_offset = 5 [ppm]  
Clipped = FALSE  
Mod\_return = 1  
Scans = 85  
Total\_scans = 85

X\_90\_width = 11.8 [us]  
X\_acq\_time = 1.04333312 [s]  
X\_angle = 30 [deg]  
X\_atn = 6 [dB]  
X\_pulse = 3.93333333 [us]  
Irr\_atn\_dec = 21.035 [dB]  
Irr\_atn\_noe = 21.035 [dB]  
Irr\_noise = WALTZ  
Decoupling = TRUE  
Initial\_wait = 1 [s]  
Noe = TRUE  
Noe\_time = 3 [s]  
Recvr\_gain = 54  
Relaxation\_delay = 3 [s]  
Repetition\_time = 4.04333312 [s]  
Temp\_get = 403.1 [dC]

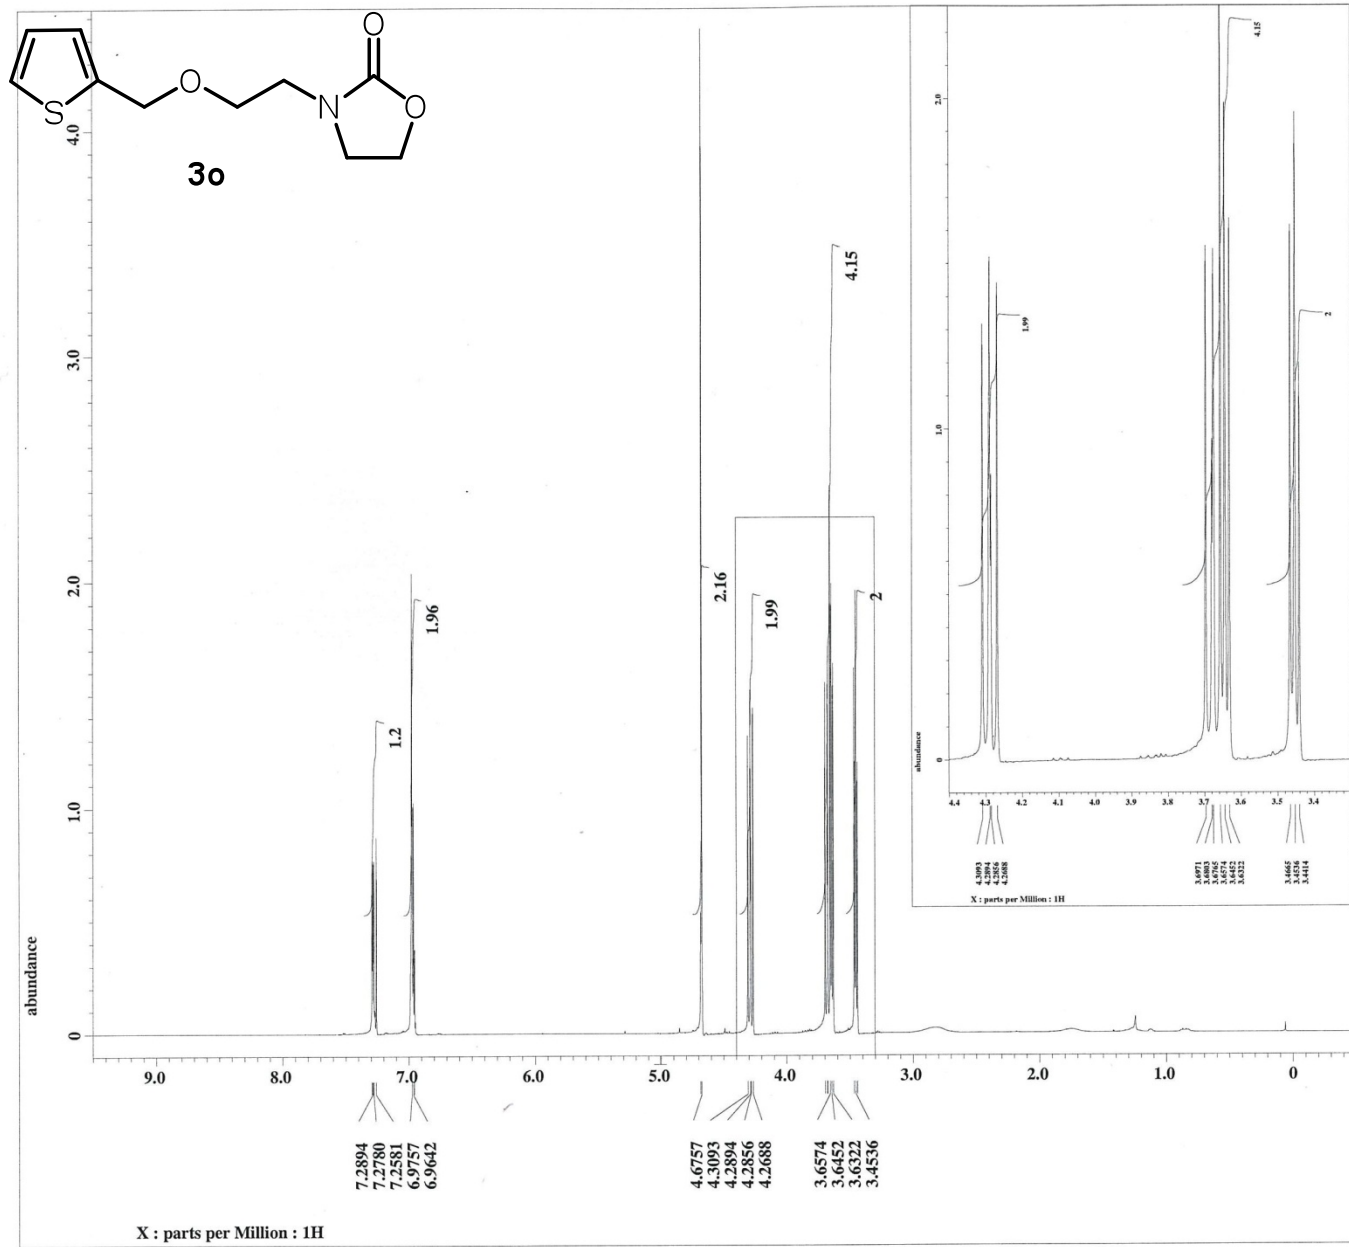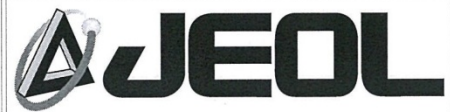

----- PROCESSING PARAMETERS -----  
 dc\_balance : 0 : FALSE  
 sexp : 0.2[Hz] : 0.0[s]  
 trapezoid3 : 0[%] : 80[%] : 100[%]  
 zerofill : 1  
 fft : 1 : TRUE : TRUE  
 machinephase  
 ppm  
 base\_correct : None : 0 : Smooth  
 reference : 7.253[ppm] : 7.26[ppm]  
 Derived from: 80-Th,r.t.,1H,CDC13-1.jdf

Filename = 80-Th,r.t.,1H,CDC13-6  
 Author = delta  
 Experiment = single\_pulse.ex2  
 Sample\_id = 1  
 Solvent = CHLOROFORM-D  
 Creation\_time = 19-DEC-2011 10:12:39  
 Revision\_time = 19-DEC-2011 10:19:46  
 Current\_time = 19-DEC-2011 10:20:17

Comment = single\_pulse  
 Data\_format = 1D REAL  
 Dim\_size = 26214  
 Dim\_title = 1H  
 Dim\_units = [ppm]  
 Dimensions = X  
 Site = ECX 400P  
 Spectrometer = DELTA2-NMR

Field\_strength = 9.389766[T] (400[MHz])  
 X\_acq\_duration = 3.2768[s]  
 X\_domain = 1H  
 X\_freq = 399.78219838[MHz]  
 X\_offset = 5[ppm]  
 X\_points = 32768  
 X\_prescans = 0  
 X\_resolution = 0.30517578[Hz]  
 X\_sweep = 10[kHz]  
 Irr\_domain = 1H  
 Irr\_freq = 399.78219838[MHz]  
 Irr\_offset = 5[ppm]  
 Tri\_domain = 1H  
 Tri\_freq = 399.78219838[MHz]  
 Tri\_offset = 5[ppm]  
 Clipped = FALSE  
 Mod\_return = 1  
 Scans = 16  
 Total\_scans = 16

X\_90\_width = 14[us]  
 X\_acq\_time = 3.2768[s]  
 X\_angle = 45[deg]  
 X\_atn = 2.1[dB]  
 X\_pulse = 7[us]  
 Irr\_mode = Off  
 Tri\_mode = Off  
 Dante\_presat = FALSE  
 Initial\_wait = 1[s]  
 Recvr\_gain = 36  
 Relaxation\_delay = 2[s]  
 Repetition\_time = 5.2768[s]  
 Temp\_get = 403.1[dC]

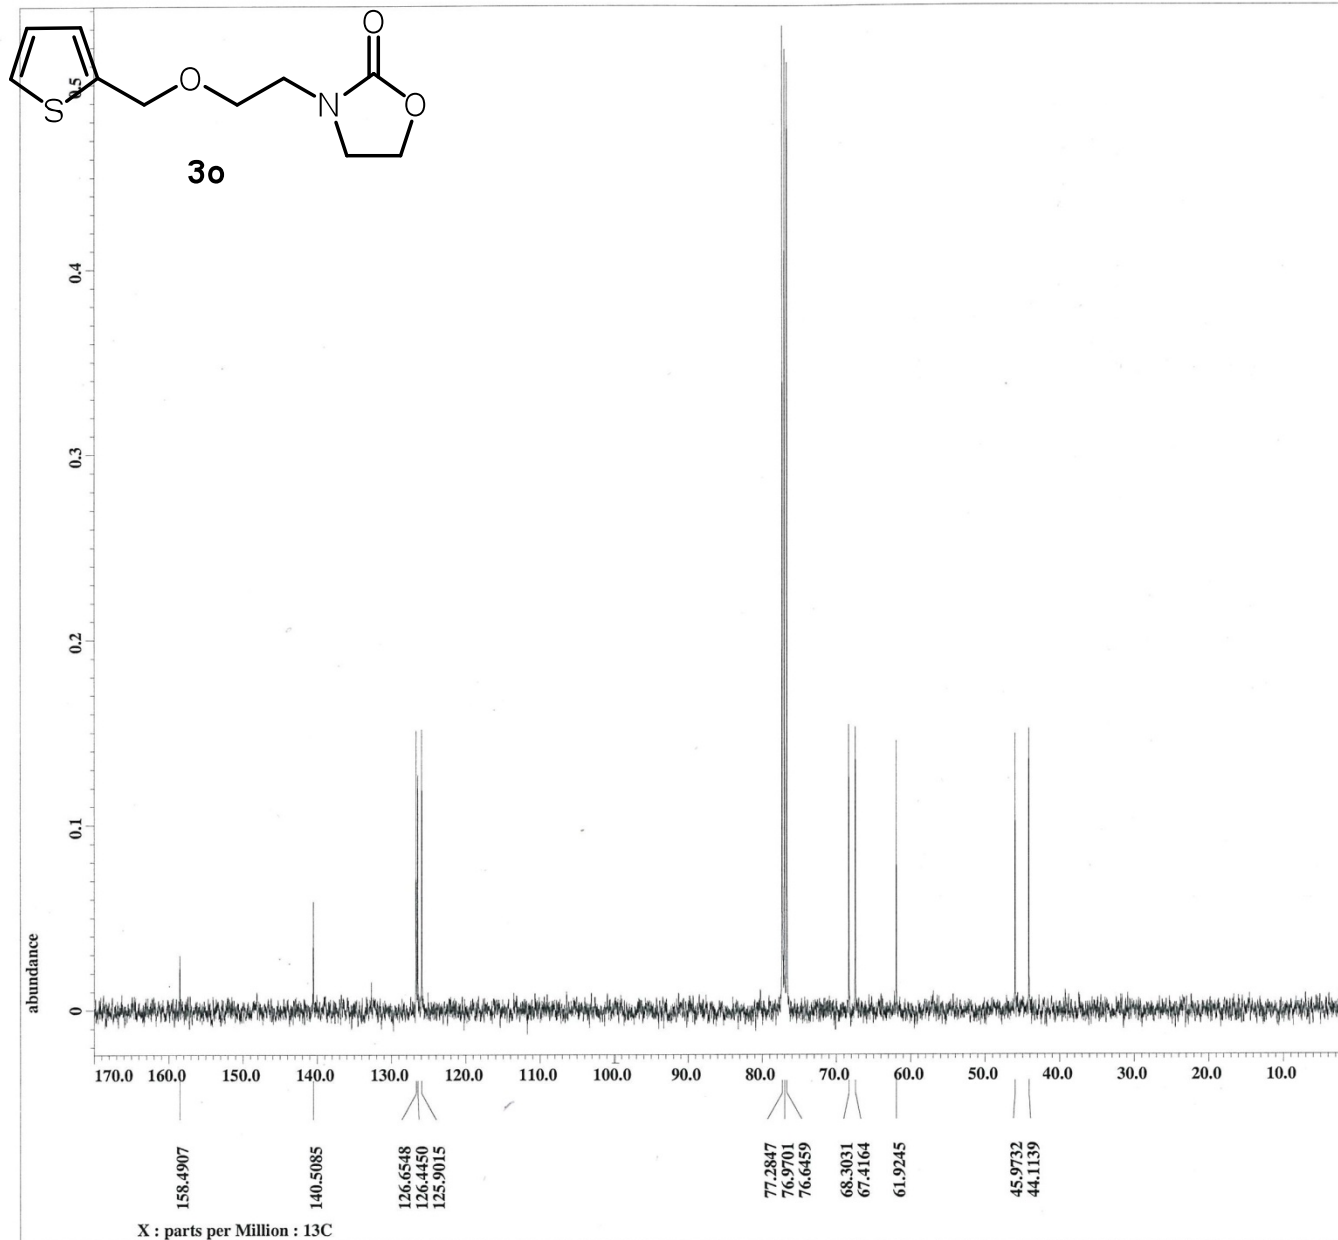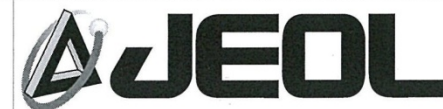

----- PROCESSING PARAMETERS -----  
dc\_balance : 0 : FALSE  
sexp : 2.0 [Hz] : 0.0 [s]  
trapezoid3 : 0 [%] : 80 [%] : 100 [%]  
zerofill : 1  
fft : 1 : TRUE : TRUE  
machinephase  
ppm  
reference : 77.166 [ppm] : 77 [ppm]  
Derived from: 80-Th,13C, r.t., CDC13-1.j

Filename = 80-Th,13C, r.t., CDC1  
Author = delta  
Experiment = single\_pulse\_dec  
Sample\_id = 1  
Solvent = CHLOROFORM-D  
Creation\_time = 19-DEC-2011 10:44:11  
Revision\_time = 19-DEC-2011 10:42:49  
Current\_time = 19-DEC-2011 10:43:17

Comment = single pulse decouple  
Data\_format = 1D COMPLEX  
Dim\_size = 26214  
Dim\_title = 13C  
Dim\_units = [ppm]  
Dimensions = X  
Site = ECX 400P  
Spectrometer = DELTA2\_NMR

Field\_strength = 9.389766 [T] (400 [MHz])  
X\_acq\_duration = 1.04333312 [s]  
X\_domain = 13C  
X\_freq = 100.52530333 [MHz]  
X\_offset = 100 [ppm]  
X\_points = 32768  
X\_prescans = 2  
X\_resolution = 0.95846665 [Hz]  
X\_sweep = 31.40703518 [kHz]  
Irr\_domain = 1H  
Irr\_freq = 399.78219838 [MHz]  
Irr\_offset = 5 [ppm]  
Clipped = FALSE  
Mod\_return = 1  
Scans = 101  
Total\_scans = 101

X\_90\_width = 11.8 [us]  
X\_acq\_time = 1.04333312 [s]  
X\_angle = 30 [deg]  
X\_atn = 6 [dB]  
X\_pulse = 3.93333333 [us]  
Irr\_atn\_dec = 21.035 [dB]  
Irr\_atn\_noe = 21.035 [dB]  
Irr\_noise = WALTZ  
Decoupling = TRUE  
Initial\_wait = 1 [s]  
Noe = TRUE  
Noe\_time = 3 [s]  
Recvr\_gain = 58  
Relaxation\_delay = 3 [s]  
Repetition\_time = 4.04333312 [s]  
Temp\_get = 403.1 [dC]
